# Supplementary material for: Mechanistic Insights into MinD Regulation and Pattern Formation in Bacillus subtilis
Source: eLife journal article supplement (doi:10.7554/elife.101517), 2024-09-11
Supplement: fig1-figsupp1-data2 [file Figure 1–figure supplement 1-source data 1.pdf › Figure 1–figure supplement 1-source data 1.pdf]

Figure 1—figure supplement 1—source data 1

SDS-PAGE Gel

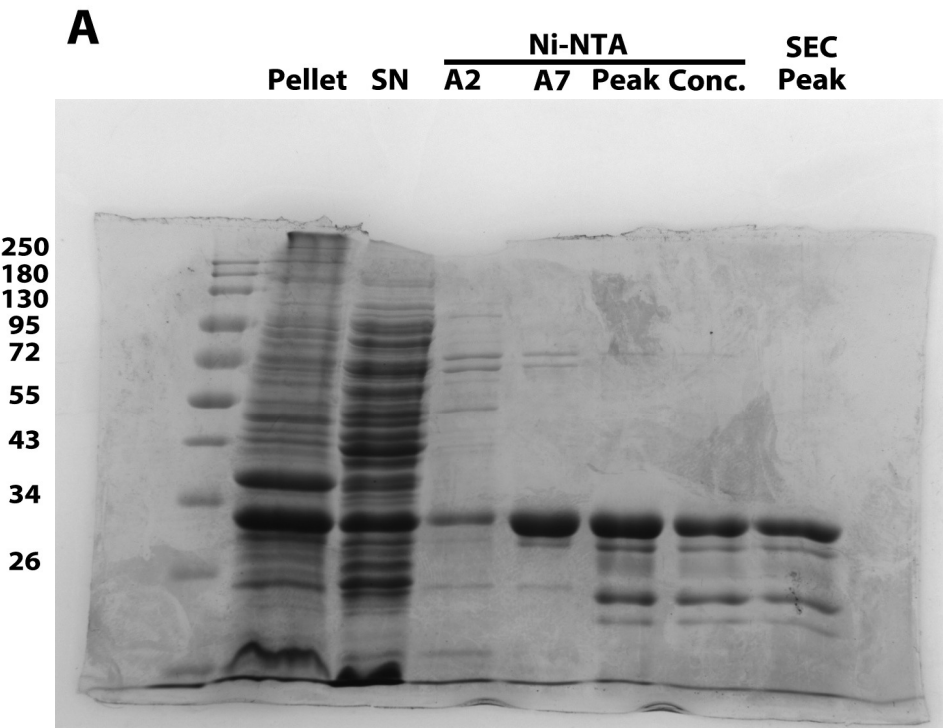

Western blot

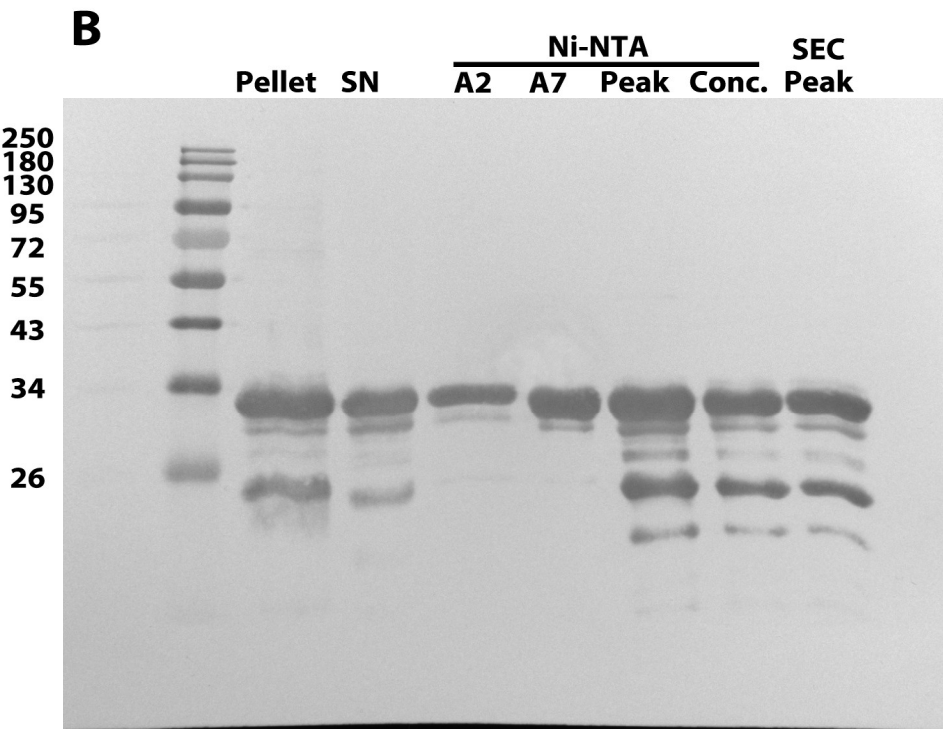

SN = Supernatant  
Conc. = Concentrated sample after Amicon centrifugation  
SEC Peak = Gel filtration / size exclusion peak
