# Supplementary material for: Mechanistic Insights into MinD Regulation and Pattern Formation in Bacillus subtilis
Source: eLife journal article supplement (doi:10.7554/elife.101517), 2024-09-11
Supplement: fig4-figsupp2-data2 [file Figure 4–figure supplement 2-source data 1.pdf › Figure 4–figure supplement 2-source data 1.pdf]

Figure 4—figure supplement 2—source data 1

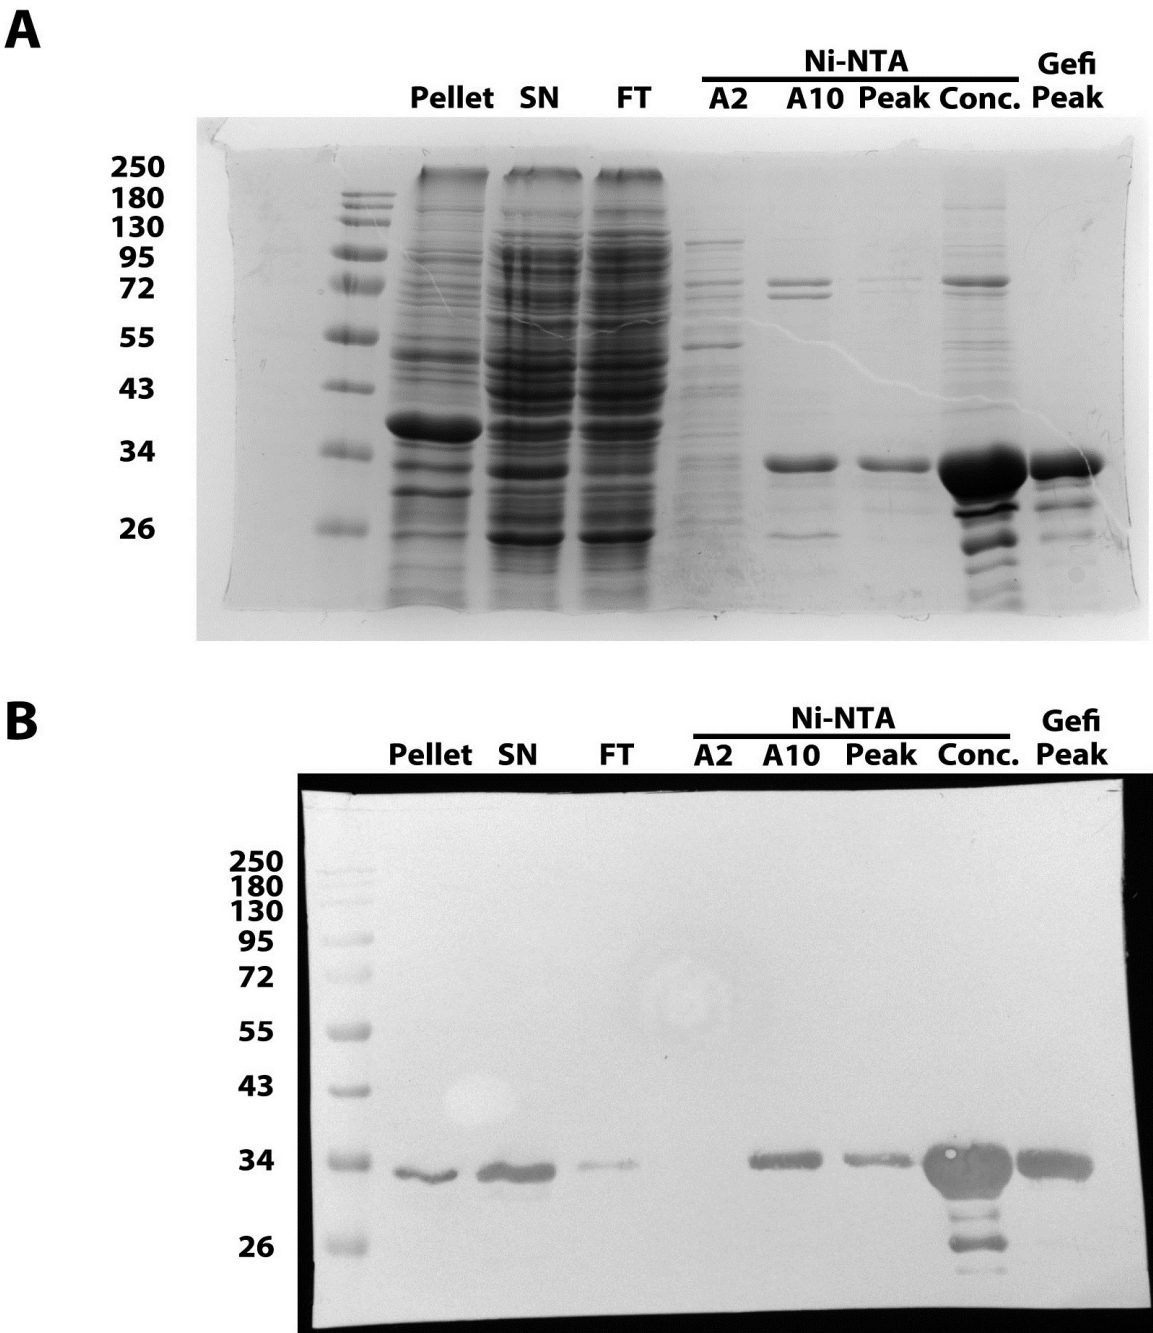

SN = Supernatant  
FT = Flow through  
Conc. = Concentrated sample after Amicon centrifugation  
Gefi Peak = Gel filtration / size exclusion peak
