# Supplementary material for: Membrane binding controls the ATPase cycle and localization of MinD in Bacillus subtilis
Source: eLife. 2026 Jun 8;13:RP101517. doi: 10.7554/eLife.101517 (PMC13246001; doi:10.7554/eLife.101517)
Supplement: Source data 1. [file elife-101517-data1.xlsx]

## Sheet: Figure 1 A
Figure 1—source data 1							GraphPadPrism linear regression:
							Best-fit values
Final Plot source data							Slope	0.3836
MinD [µM]	Pi release [µM/min]						Y-intercept	0.1538
X	Mean	SD	N				X-intercept	-0.4011
0.5	0.157566	0.00752594	3				1/slope	2.607
1	0.376669	0.0306799	3
2	0.782202	0.0568683	3				Std. Error
4	1.9725	0.130057	3				Slope	0.01437
8	3.86689	0.100791	3				Y-intercept	0.1119
12	5.04796	0.340772	3
16	5.71282	0.137674	3				95% Confidence Intervals
							Slope	0.3538 to 0.4134
Plot Source Data after background substraction, normalization and conversion							Y-intercept	-0.07830 to 0.3860
Pi[µM]/min	Pi release [µM/min]						X-intercept	-1.067 to 0.1937
MinD [µM]	MinD Well 1	MinD Well 2	MinD Well 3	Average	StDev
0	0	0	0	0	0		Goodness of Fit
0.5	0.167523	0.149331	0.155845	0.157566	0.00752594		R squared	0.97
1	0.407998	0.335009	0.387001	0.376669	0.0306799		Sy.x	0.3926
2	0.862562	0.744798	0.739245	0.782202	0.0568683
4	1.82087	1.95815	2.13847	1.9725	0.130057		Is slope significantly non-zero?
8	3.7283	3.96503	3.90735	3.86689	0.100791		F	712.2
12	4.57192	5.35098	5.22099	5.04796	0.340772		DFn, DFd	1, 22
16	5.55414	5.69445	5.88987	5.71282	0.137674		P value	<0.0001
							Deviation from zero?	Significant
							Equation	Y = 0.3836*X + 0.1538
							Data
							Number of X values	24
							Maximum number of Y replicates	1
							Total number of values	24
							Number of missing values	0
Raw plate reader data
MinD [0-16 µM] + ATP [2 µM] + Liposomes [0.4 mg/ml]
MinD Row 1
Time [s]	0	60.1	120	180	240	300.1	360.1	420.1	480.1	540.1	600.1	660.1	720.1	780.1	840.1	900.1	960.1	1020.1	1080.1	1140.1	1200.2	1260.2	1320.2	1380.2	1440.2	1500.2	1560.2	1620.2	1680.2	1740.2	1800.2	1860.2	1920.2	1980.2	2040.2	2100.3	2160.3	2220.3	2280.3	2340.3	2400.3	2460.3	2520.3	2580.3	2640.3	2700.3	2760.3	2820.3	2880.3
MinD [0 µM]	0.1883	0.1881	0.1871	0.1857	0.1856	0.1844	0.184	0.1835	0.183	0.1832	0.1831	0.183	0.1829	0.183	0.1825	0.1827	0.1827	0.1819	0.1819	0.1818	0.1817	0.1804	0.181	0.1805	0.1801	0.18	0.1799	0.1799	0.179	0.1787	0.1792	0.1786	0.1784	0.1778	0.1777	0.1774	0.1773	0.1769	0.177	0.1764	0.176	0.1755	0.1753	0.175	0.1739	0.1733	0.1734	0.1733	0.1731
MinD [0.5 µM]	0.1683	0.1683	0.1669	0.1648	0.1657	0.1632	0.164	0.1631	0.1635	0.1627	0.1641	0.1637	0.1635	0.1629	0.1614	0.1616	0.161	0.1588	0.1582	0.1577	0.1575	0.1569	0.1575	0.1575	0.1573	0.1575	0.1576	0.1579	0.1577	0.1578	0.1579	0.158	0.1577	0.1577	0.158	0.1582	0.1585	0.1579	0.1586	0.1584	0.1586	0.158	0.1586	0.1586	0.1587	0.1587	0.1592	0.1595	0.1595
MinD [1 µM]	0.1903	0.1917	0.1918	0.1912	0.1903	0.1889	0.1887	0.1892	0.1887	0.1898	0.1897	0.1901	0.1908	0.1917	0.1915	0.1914	0.1929	0.193	0.1924	0.1927	0.1928	0.192	0.1927	0.1931	0.1933	0.1942	0.1944	0.1953	0.1958	0.1963	0.1976	0.1984	0.1991	0.1996	0.2006	0.2013	0.2027	0.2028	0.2038	0.2046	0.2054	0.2064	0.2072	0.2076	0.2092	0.21	0.2112	0.2123	0.2132
MinD [2 µM]	0.2079	0.2109	0.2128	0.2134	0.2129	0.2121	0.2126	0.2133	0.2144	0.2156	0.2167	0.2178	0.2192	0.2188	0.2201	0.2216	0.2237	0.2248	0.2261	0.228	0.2297	0.2312	0.2332	0.2352	0.2364	0.2381	0.2401	0.2425	0.2449	0.2459	0.2471	0.2525	0.2517	0.2526	0.2547	0.2551	0.2551	0.2563	0.2647	0.2591	0.2608	0.2618	0.2636	0.2658	0.2674	0.2699	0.2712	0.2736	0.2762
MinD [4 µM]	0.2284	0.2325	0.2344	0.2384	0.2404	0.241	0.2454	0.2494	0.2548	0.2583	0.2644	0.267	0.2724	0.2743	0.2803	0.2853	0.2909	0.2954	0.2988	0.3037	0.3081	0.316	0.3205	0.3241	0.3348	0.3322	0.3368	0.3417	0.346	0.3502	0.3672	0.3573	0.3619	0.3634	0.366	0.3677	0.3734	0.3728	0.3781	0.3791	0.3799	0.3808	0.3843	0.3853	0.3873	0.3874	0.3883	0.3888	0.3889
MinD [8 µM]	0.2594	0.2679	0.2787	0.2896	0.2987	0.3078	0.3173	0.3278	0.3384	0.3504	0.3625	0.3727	0.3831	0.3911	0.3992	0.4077	0.4143	0.4195	0.4262	0.4311	0.4334	0.4357	0.4385	0.4423	0.4423	0.4437	0.4448	0.4448	0.444	0.4461	0.4442	0.4458	0.4477	0.4439	0.444	0.4448	0.4432	0.4463	0.4444	0.4444	0.4452	0.4444	0.4448	0.4441	0.4437	0.4443	0.4435	0.4427	0.4426
MinD [12 µM]	0.2651	0.279	0.2891	0.2995	0.312	0.3256	0.3391	0.3529	0.3644	0.3756	0.3876	0.3965	0.4047	0.4127	0.4187	0.4237	0.4275	0.4322	0.4352	0.437	0.4377	0.4388	0.4398	0.4407	0.4404	0.4421	0.4413	0.4433	0.4429	0.4409	0.442	0.4403	0.4389	0.4389	0.44	0.437	0.4384	0.4365	0.4387	0.4356	0.4358	0.4349	0.4349	0.4353	0.4352	0.4358	0.4348	0.4345	0.4343
MinD [16 µM]	0.287	0.3074	0.3238	0.3379	0.3524	0.368	0.3829	0.3976	0.4105	0.4203	0.4291	0.435	0.44	0.4431	0.4454	0.4473	0.4495	0.449	0.4488	0.449	0.4502	0.4498	0.4491	0.4493	0.4483	0.4489	0.4491	0.4485	0.4483	0.4482	0.4504	0.4487	0.4477	0.4487	0.4488	0.4486	0.4485	0.4475	0.4481	0.4476	0.4477	0.4471	0.4471	0.4464	0.445	0.4451	0.446	0.4461	0.4442
MinD Row2
Time [s]	0	60.1	120	180.1	240.1	300.1	360.1	420.1	480.1	540.1	600.1	660.1	720.1	780.1	840.1	900.1	960.1	1020.1	1080.2	1140.2	1200.2	1260.2	1320.2	1380.2	1440.2	1500.2	1560.2	1620.2	1680.2	1740.2	1800.2	1860.2	1920.2	1980.3	2040.3	2100.3	2160.3	2220.3	2280.3	2340.3	2400.3	2460.3	2520.3	2580.3	2640.3	2700.3	2760.3	2820.4	2880.4
MinD [0 µM]	0.2348	0.2346	0.234	0.233	0.2333	0.2328	0.233	0.232	0.2314	0.2331	0.2332	0.2318	0.2323	0.2325	0.233	0.2328	0.2338	0.2331	0.2335	0.233	0.2337	0.2329	0.2326	0.2322	0.2332	0.2323	0.2321	0.2323	0.2325	0.2312	0.2311	0.2315	0.2307	0.23	0.2299	0.2307	0.2301	0.2292	0.23	0.2294	0.23	0.2287	0.2289	0.2282	0.2283	0.2273	0.2274	0.228	0.2273
MinD [0.5 µM]	0.1862	0.1851	0.1834	0.1824	0.182	0.1817	0.1806	0.1811	0.1805	0.1808	0.1809	0.1808	0.1813	0.1812	0.1813	0.1815	0.1817	0.1821	0.1821	0.1825	0.1825	0.1825	0.1826	0.1829	0.183	0.1831	0.1832	0.184	0.1834	0.183	0.1834	0.1828	0.1821	0.18	0.1796	0.1794	0.1795	0.1787	0.1788	0.1785	0.1785	0.1785	0.1786	0.1788	0.1792	0.1793	0.1797	0.1801	0.1795
MinD [1 µM]	0.1934	0.1932	0.1924	0.1913	0.1916	0.1898	0.1898	0.19	0.1904	0.1909	0.1934	0.1908	0.1903	0.1911	0.1911	0.1914	0.1928	0.193	0.1929	0.1939	0.1942	0.1945	0.1953	0.196	0.1958	0.1976	0.1965	0.197	0.1962	0.1956	0.1958	0.1957	0.1962	0.1959	0.1962	0.1972	0.1978	0.1976	0.1993	0.1989	0.1998	0.2004	0.2009	0.2018	0.2023	0.2034	0.2044	0.205	0.2056
MinD [2 µM]	0.1861	0.1893	0.1914	0.192	0.1918	0.1915	0.1918	0.1925	0.1935	0.1953	0.1962	0.1963	0.1987	0.1994	0.202	0.2027	0.2046	0.2062	0.2075	0.2097	0.2118	0.2126	0.2148	0.2164	0.2184	0.2202	0.2215	0.2242	0.2254	0.2269	0.2289	0.2324	0.2334	0.2348	0.2352	0.2371	0.2385	0.2391	0.2408	0.2414	0.2426	0.2442	0.2456	0.2472	0.2484	0.2505	0.2525	0.2542	0.2573
MinD [4 µM]	0.2184	0.2234	0.2298	0.2334	0.2369	0.2393	0.243	0.2464	0.2497	0.2563	0.26	0.2653	0.2721	0.2726	0.2794	0.2853	0.2886	0.2945	0.2994	0.3056	0.3103	0.3147	0.3215	0.3251	0.3318	0.3353	0.342	0.347	0.3492	0.3546	0.358	0.3634	0.3658	0.3794	0.3714	0.3771	0.3779	0.3774	0.3788	0.3818	0.3799	0.379	0.414	0.3799	0.3802	0.3814	0.3817	0.3797	0.3797
MinD [8 µM]	0.263	0.2773	0.2876	0.2998	0.3109	0.3205	0.3308	0.3419	0.3536	0.3671	0.3811	0.3947	0.4066	0.4176	0.427	0.4366	0.4461	0.4529	0.4597	0.4656	0.4691	0.4713	0.4751	0.4754	0.4773	0.479	0.4776	0.4785	0.4782	0.476	0.4753	0.4748	0.473	0.472	0.4715	0.4692	0.4685	0.4666	0.4677	0.4657	0.465	0.4654	0.4642	0.4637	0.4641	0.4627	0.4618	0.4611	0.462
MinD [12 µM]	0.2764	0.2922	0.3057	0.321	0.3377	0.3516	0.3657	0.3798	0.3921	0.4043	0.4148	0.4241	0.4317	0.4388	0.4424	0.4487	0.451	0.4533	0.4543	0.4551	0.4546	0.4537	0.4527	0.4525	0.451	0.4509	0.4504	0.4504	0.4492	0.4502	0.4489	0.4492	0.4493	0.4496	0.4494	0.4495	0.4496	0.4494	0.45	0.4503	0.4497	0.4498	0.4489	0.4492	0.4491	0.4498	0.4497	0.4488	0.4484
MinD [16 µM]	0.2826	0.3009	0.3165	0.3318	0.3479	0.3641	0.3795	0.3942	0.4072	0.4187	0.4278	0.4354	0.441	0.4449	0.4478	0.4508	0.4528	0.4532	0.4537	0.4541	0.455	0.4537	0.4542	0.4535	0.4532	0.4528	0.453	0.4531	0.4526	0.4527	0.4522	0.4527	0.4525	0.4515	0.4519	0.4523	0.4523	0.4515	0.4522	0.4526	0.452	0.4521	0.452	0.4521	0.4521	0.4519	0.4521	0.4515	0.4516
MinD Row 3
Time [s]	0	60.1	120	180.1	240.1	300.1	360.1	420.1	480.1	540.1	600.1	660.1	720.1	780.1	840.1	900.1	960.1	1020.1	1080.2	1140.2	1200.2	1260.2	1320.2	1380.2	1440.2	1500.2	1560.2	1620.2	1680.2	1740.2	1800.2	1860.2	1920.2	1980.3	2040.3	2100.3	2160.3	2220.3	2280.3	2340.3	2400.3	2460.3	2520.3	2580.3	2640.3	2700.3	2760.3	2820.4	2880.4
MinD [0 µM]	0.1725	0.1728	0.1736	0.1729	0.1727	0.1707	0.1686	0.1683	0.1677	0.1688	0.1684	0.1666	0.1667	0.1677	0.1665	0.1664	0.1666	0.1661	0.1676	0.1658	0.1655	0.1671	0.1651	0.1646	0.1642	0.1643	0.1647	0.1652	0.1634	0.1633	0.1649	0.1635	0.1625	0.1625	0.162	0.1619	0.1619	0.1614	0.1615	0.1609	0.1609	0.1601	0.1602	0.16	0.1599	0.1593	0.1595	0.1589	0.1586
MinD [0.5 µM]	0.1829	0.1853	0.1847	0.184	0.1835	0.1826	0.1819	0.1821	0.1819	0.1816	0.1819	0.1815	0.182	0.1819	0.1822	0.1825	0.183	0.1829	0.1835	0.1833	0.1835	0.1829	0.1841	0.1842	0.1836	0.1842	0.1843	0.1842	0.1839	0.1839	0.1844	0.1838	0.183	0.1821	0.1812	0.1812	0.1811	0.1807	0.1804	0.1805	0.18	0.1796	0.1799	0.1807	0.1806	0.1808	0.181	0.1815	0.1812
MinD [1 µM]	0.1843	0.184	0.1834	0.1824	0.1815	0.1809	0.1802	0.1809	0.1806	0.1807	0.1804	0.1805	0.1809	0.1812	0.1824	0.1825	0.1836	0.1838	0.1839	0.1851	0.1851	0.1851	0.1862	0.1867	0.1865	0.1873	0.1878	0.1879	0.1876	0.1873	0.1873	0.1871	0.1869	0.1867	0.1869	0.1879	0.1882	0.1889	0.1897	0.1899	0.1906	0.1908	0.1917	0.1925	0.1934	0.194	0.1948	0.1956	0.196
MinD [2 µM]	0.1987	0.1997	0.2041	0.2045	0.204	0.2044	0.2041	0.2053	0.2058	0.2088	0.2078	0.209	0.2104	0.2114	0.2125	0.2143	0.2152	0.217	0.2189	0.2202	0.2224	0.223	0.2244	0.2265	0.2277	0.2292	0.2317	0.2333	0.2348	0.2369	0.2391	0.2393	0.242	0.2424	0.2438	0.247	0.2486	0.2477	0.2496	0.25	0.2519	0.2544	0.2534	0.2561	0.2579	0.2686	0.2595	0.2616	0.2635
MinD [4 µM]	0.2239	0.2285	0.2332	0.238	0.2401	0.2426	0.2469	0.2514	0.2559	0.2611	0.2671	0.2719	0.2795	0.2841	0.286	0.2925	0.299	0.3029	0.3095	0.3167	0.3215	0.3258	0.3315	0.3384	0.3433	0.3491	0.3539	0.3596	0.3654	0.3693	0.3739	0.3844	0.381	0.3846	0.3876	0.3905	0.3926	0.3961	0.3989	0.3989	0.4009	0.4002	0.4035	0.4014	0.4019	0.4016	0.4011	0.3996	0.3998
MinD [8 µM]	0.2499	0.2647	0.2766	0.2862	0.2961	0.3065	0.3168	0.328	0.3409	0.3536	0.3674	0.38	0.3929	0.4025	0.4143	0.4231	0.4315	0.4385	0.4443	0.4487	0.4521	0.4533	0.4544	0.4565	0.4564	0.457	0.4557	0.4539	0.4526	0.4525	0.45	0.4508	0.4495	0.4497	0.4484	0.4485	0.4495	0.4474	0.4498	0.4496	0.4483	0.4488	0.4475	0.4481	0.4475	0.4461	0.4468	0.4461	0.4452
MinD [12 µM]	0.2734	0.2923	0.3071	0.3204	0.3334	0.3457	0.361	0.3774	0.3939	0.4092	0.4227	0.4332	0.4446	0.4526	0.4574	0.4639	0.4686	0.4714	0.4749	0.4758	0.477	0.4781	0.4801	0.4796	0.4781	0.4774	0.4764	0.4773	0.4753	0.4744	0.4766	0.4755	0.4761	0.476	0.4738	0.4756	0.4793	0.474	0.4746	0.4744	0.4776	0.4733	0.474	0.4729	0.4719	0.4718	0.4724	0.4724	0.4715
MinD [16 µM]	0.2902	0.3092	0.3261	0.3402	0.3579	0.3753	0.3915	0.4054	0.4172	0.4283	0.437	0.4442	0.4497	0.4534	0.457	0.4594	0.462	0.4629	0.4629	0.4632	0.4641	0.4634	0.4637	0.4633	0.4628	0.4625	0.4618	0.4623	0.4627	0.4629	0.4624	0.463	0.4634	0.4631	0.4637	0.4628	0.4626	0.4626	0.4627	0.4624	0.461	0.4627	0.4604	0.4608	0.4599	0.4597	0.4598	0.4597	0.4591
Phosphate standard
Pi Standard [µM]	Lane 4	Lane 5	Average
0	0.128	0.114	0.121
5	0.1198	0.1226	0.1212
10	0.1344	0.1395	0.13695
15	0.1487	0.1489	0.1488
20	0.1581	0.1637	0.1609
50	0.2493	0.2459	0.2476
100	0.3898	0.3884	0.3891
His-MinD MW	31690	g/mole (Daltons)
	0.003169	mg of MinD per µM in 100µl
[truncated: 132 more columns]

## Sheet: Figure 1 B
Figure 1—source data 2
Final Plot source data
MinD [µM]	Activity [nmol/min/mg]
X	Mean	SD	N
0.5	9.94422	0.474972	3
1	11.8861	0.968125	3
2	12.3415	0.89726	3
4	15.5609	1.02601	3
8	15.2528	0.397565	3
12	13.2743	0.896109	3
16	11.267	0.271525	3
Plot Source Data after background substraction, normalization and conversion
	Activity [nmol/min/mg]
MinD [µM]	MinD Well 1	MinD Well 2	MinD Well 3	Average	StDev
0	0	0	0	0	0
0.5	10.5726	9.42448	9.83557	9.94422	0.474972
1	12.8747	10.5715	12.2121	11.8861	0.968125
2	13.6094	11.7513	11.6637	12.3415	0.89726
4	14.3647	15.4477	16.8702	15.5609	1.02601
8	14.7061	15.6399	15.4124	15.2528	0.397565
12	12.0225	14.0712	13.7293	13.2743	0.896109
16	10.954	11.2308	11.6162	11.267	0.271525
Raw plate reader data
MinD [0-16 µM] + ATP [2 µM] + Liposomes [0.4 mg/ml]
MinD Row 1
Time [s]	0	60.1	120	180	240	300.1	360.1	420.1	480.1	540.1	600.1	660.1	720.1	780.1	840.1	900.1	960.1	1020.1	1080.1	1140.1	1200.2	1260.2	1320.2	1380.2	1440.2	1500.2	1560.2	1620.2	1680.2	1740.2	1800.2	1860.2	1920.2	1980.2	2040.2	2100.3	2160.3	2220.3	2280.3	2340.3	2400.3	2460.3	2520.3	2580.3	2640.3	2700.3	2760.3	2820.3	2880.3
MinD [0 µM]	0.1883	0.1881	0.1871	0.1857	0.1856	0.1844	0.184	0.1835	0.183	0.1832	0.1831	0.183	0.1829	0.183	0.1825	0.1827	0.1827	0.1819	0.1819	0.1818	0.1817	0.1804	0.181	0.1805	0.1801	0.18	0.1799	0.1799	0.179	0.1787	0.1792	0.1786	0.1784	0.1778	0.1777	0.1774	0.1773	0.1769	0.177	0.1764	0.176	0.1755	0.1753	0.175	0.1739	0.1733	0.1734	0.1733	0.1731
MinD [0.5 µM]	0.1683	0.1683	0.1669	0.1648	0.1657	0.1632	0.164	0.1631	0.1635	0.1627	0.1641	0.1637	0.1635	0.1629	0.1614	0.1616	0.161	0.1588	0.1582	0.1577	0.1575	0.1569	0.1575	0.1575	0.1573	0.1575	0.1576	0.1579	0.1577	0.1578	0.1579	0.158	0.1577	0.1577	0.158	0.1582	0.1585	0.1579	0.1586	0.1584	0.1586	0.158	0.1586	0.1586	0.1587	0.1587	0.1592	0.1595	0.1595
MinD [1 µM]	0.1903	0.1917	0.1918	0.1912	0.1903	0.1889	0.1887	0.1892	0.1887	0.1898	0.1897	0.1901	0.1908	0.1917	0.1915	0.1914	0.1929	0.193	0.1924	0.1927	0.1928	0.192	0.1927	0.1931	0.1933	0.1942	0.1944	0.1953	0.1958	0.1963	0.1976	0.1984	0.1991	0.1996	0.2006	0.2013	0.2027	0.2028	0.2038	0.2046	0.2054	0.2064	0.2072	0.2076	0.2092	0.21	0.2112	0.2123	0.2132
MinD [2 µM]	0.2079	0.2109	0.2128	0.2134	0.2129	0.2121	0.2126	0.2133	0.2144	0.2156	0.2167	0.2178	0.2192	0.2188	0.2201	0.2216	0.2237	0.2248	0.2261	0.228	0.2297	0.2312	0.2332	0.2352	0.2364	0.2381	0.2401	0.2425	0.2449	0.2459	0.2471	0.2525	0.2517	0.2526	0.2547	0.2551	0.2551	0.2563	0.2647	0.2591	0.2608	0.2618	0.2636	0.2658	0.2674	0.2699	0.2712	0.2736	0.2762
MinD [4 µM]	0.2284	0.2325	0.2344	0.2384	0.2404	0.241	0.2454	0.2494	0.2548	0.2583	0.2644	0.267	0.2724	0.2743	0.2803	0.2853	0.2909	0.2954	0.2988	0.3037	0.3081	0.316	0.3205	0.3241	0.3348	0.3322	0.3368	0.3417	0.346	0.3502	0.3672	0.3573	0.3619	0.3634	0.366	0.3677	0.3734	0.3728	0.3781	0.3791	0.3799	0.3808	0.3843	0.3853	0.3873	0.3874	0.3883	0.3888	0.3889
MinD [8 µM]	0.2594	0.2679	0.2787	0.2896	0.2987	0.3078	0.3173	0.3278	0.3384	0.3504	0.3625	0.3727	0.3831	0.3911	0.3992	0.4077	0.4143	0.4195	0.4262	0.4311	0.4334	0.4357	0.4385	0.4423	0.4423	0.4437	0.4448	0.4448	0.444	0.4461	0.4442	0.4458	0.4477	0.4439	0.444	0.4448	0.4432	0.4463	0.4444	0.4444	0.4452	0.4444	0.4448	0.4441	0.4437	0.4443	0.4435	0.4427	0.4426
MinD [12 µM]	0.2651	0.279	0.2891	0.2995	0.312	0.3256	0.3391	0.3529	0.3644	0.3756	0.3876	0.3965	0.4047	0.4127	0.4187	0.4237	0.4275	0.4322	0.4352	0.437	0.4377	0.4388	0.4398	0.4407	0.4404	0.4421	0.4413	0.4433	0.4429	0.4409	0.442	0.4403	0.4389	0.4389	0.44	0.437	0.4384	0.4365	0.4387	0.4356	0.4358	0.4349	0.4349	0.4353	0.4352	0.4358	0.4348	0.4345	0.4343
MinD [16 µM]	0.287	0.3074	0.3238	0.3379	0.3524	0.368	0.3829	0.3976	0.4105	0.4203	0.4291	0.435	0.44	0.4431	0.4454	0.4473	0.4495	0.449	0.4488	0.449	0.4502	0.4498	0.4491	0.4493	0.4483	0.4489	0.4491	0.4485	0.4483	0.4482	0.4504	0.4487	0.4477	0.4487	0.4488	0.4486	0.4485	0.4475	0.4481	0.4476	0.4477	0.4471	0.4471	0.4464	0.445	0.4451	0.446	0.4461	0.4442
MinD Row2
Time [s]	0	60.1	120	180.1	240.1	300.1	360.1	420.1	480.1	540.1	600.1	660.1	720.1	780.1	840.1	900.1	960.1	1020.1	1080.2	1140.2	1200.2	1260.2	1320.2	1380.2	1440.2	1500.2	1560.2	1620.2	1680.2	1740.2	1800.2	1860.2	1920.2	1980.3	2040.3	2100.3	2160.3	2220.3	2280.3	2340.3	2400.3	2460.3	2520.3	2580.3	2640.3	2700.3	2760.3	2820.4	2880.4
MinD [0 µM]	0.2348	0.2346	0.234	0.233	0.2333	0.2328	0.233	0.232	0.2314	0.2331	0.2332	0.2318	0.2323	0.2325	0.233	0.2328	0.2338	0.2331	0.2335	0.233	0.2337	0.2329	0.2326	0.2322	0.2332	0.2323	0.2321	0.2323	0.2325	0.2312	0.2311	0.2315	0.2307	0.23	0.2299	0.2307	0.2301	0.2292	0.23	0.2294	0.23	0.2287	0.2289	0.2282	0.2283	0.2273	0.2274	0.228	0.2273
MinD [0.5 µM]	0.1862	0.1851	0.1834	0.1824	0.182	0.1817	0.1806	0.1811	0.1805	0.1808	0.1809	0.1808	0.1813	0.1812	0.1813	0.1815	0.1817	0.1821	0.1821	0.1825	0.1825	0.1825	0.1826	0.1829	0.183	0.1831	0.1832	0.184	0.1834	0.183	0.1834	0.1828	0.1821	0.18	0.1796	0.1794	0.1795	0.1787	0.1788	0.1785	0.1785	0.1785	0.1786	0.1788	0.1792	0.1793	0.1797	0.1801	0.1795
MinD [1 µM]	0.1934	0.1932	0.1924	0.1913	0.1916	0.1898	0.1898	0.19	0.1904	0.1909	0.1934	0.1908	0.1903	0.1911	0.1911	0.1914	0.1928	0.193	0.1929	0.1939	0.1942	0.1945	0.1953	0.196	0.1958	0.1976	0.1965	0.197	0.1962	0.1956	0.1958	0.1957	0.1962	0.1959	0.1962	0.1972	0.1978	0.1976	0.1993	0.1989	0.1998	0.2004	0.2009	0.2018	0.2023	0.2034	0.2044	0.205	0.2056
MinD [2 µM]	0.1861	0.1893	0.1914	0.192	0.1918	0.1915	0.1918	0.1925	0.1935	0.1953	0.1962	0.1963	0.1987	0.1994	0.202	0.2027	0.2046	0.2062	0.2075	0.2097	0.2118	0.2126	0.2148	0.2164	0.2184	0.2202	0.2215	0.2242	0.2254	0.2269	0.2289	0.2324	0.2334	0.2348	0.2352	0.2371	0.2385	0.2391	0.2408	0.2414	0.2426	0.2442	0.2456	0.2472	0.2484	0.2505	0.2525	0.2542	0.2573
MinD [4 µM]	0.2184	0.2234	0.2298	0.2334	0.2369	0.2393	0.243	0.2464	0.2497	0.2563	0.26	0.2653	0.2721	0.2726	0.2794	0.2853	0.2886	0.2945	0.2994	0.3056	0.3103	0.3147	0.3215	0.3251	0.3318	0.3353	0.342	0.347	0.3492	0.3546	0.358	0.3634	0.3658	0.3794	0.3714	0.3771	0.3779	0.3774	0.3788	0.3818	0.3799	0.379	0.414	0.3799	0.3802	0.3814	0.3817	0.3797	0.3797
MinD [8 µM]	0.263	0.2773	0.2876	0.2998	0.3109	0.3205	0.3308	0.3419	0.3536	0.3671	0.3811	0.3947	0.4066	0.4176	0.427	0.4366	0.4461	0.4529	0.4597	0.4656	0.4691	0.4713	0.4751	0.4754	0.4773	0.479	0.4776	0.4785	0.4782	0.476	0.4753	0.4748	0.473	0.472	0.4715	0.4692	0.4685	0.4666	0.4677	0.4657	0.465	0.4654	0.4642	0.4637	0.4641	0.4627	0.4618	0.4611	0.462
MinD [12 µM]	0.2764	0.2922	0.3057	0.321	0.3377	0.3516	0.3657	0.3798	0.3921	0.4043	0.4148	0.4241	0.4317	0.4388	0.4424	0.4487	0.451	0.4533	0.4543	0.4551	0.4546	0.4537	0.4527	0.4525	0.451	0.4509	0.4504	0.4504	0.4492	0.4502	0.4489	0.4492	0.4493	0.4496	0.4494	0.4495	0.4496	0.4494	0.45	0.4503	0.4497	0.4498	0.4489	0.4492	0.4491	0.4498	0.4497	0.4488	0.4484
MinD [16 µM]	0.2826	0.3009	0.3165	0.3318	0.3479	0.3641	0.3795	0.3942	0.4072	0.4187	0.4278	0.4354	0.441	0.4449	0.4478	0.4508	0.4528	0.4532	0.4537	0.4541	0.455	0.4537	0.4542	0.4535	0.4532	0.4528	0.453	0.4531	0.4526	0.4527	0.4522	0.4527	0.4525	0.4515	0.4519	0.4523	0.4523	0.4515	0.4522	0.4526	0.452	0.4521	0.452	0.4521	0.4521	0.4519	0.4521	0.4515	0.4516
MinD Row 3
Time [s]	0	60.1	120	180.1	240.1	300.1	360.1	420.1	480.1	540.1	600.1	660.1	720.1	780.1	840.1	900.1	960.1	1020.1	1080.2	1140.2	1200.2	1260.2	1320.2	1380.2	1440.2	1500.2	1560.2	1620.2	1680.2	1740.2	1800.2	1860.2	1920.2	1980.3	2040.3	2100.3	2160.3	2220.3	2280.3	2340.3	2400.3	2460.3	2520.3	2580.3	2640.3	2700.3	2760.3	2820.4	2880.4
MinD [0 µM]	0.1725	0.1728	0.1736	0.1729	0.1727	0.1707	0.1686	0.1683	0.1677	0.1688	0.1684	0.1666	0.1667	0.1677	0.1665	0.1664	0.1666	0.1661	0.1676	0.1658	0.1655	0.1671	0.1651	0.1646	0.1642	0.1643	0.1647	0.1652	0.1634	0.1633	0.1649	0.1635	0.1625	0.1625	0.162	0.1619	0.1619	0.1614	0.1615	0.1609	0.1609	0.1601	0.1602	0.16	0.1599	0.1593	0.1595	0.1589	0.1586
MinD [0.5 µM]	0.1829	0.1853	0.1847	0.184	0.1835	0.1826	0.1819	0.1821	0.1819	0.1816	0.1819	0.1815	0.182	0.1819	0.1822	0.1825	0.183	0.1829	0.1835	0.1833	0.1835	0.1829	0.1841	0.1842	0.1836	0.1842	0.1843	0.1842	0.1839	0.1839	0.1844	0.1838	0.183	0.1821	0.1812	0.1812	0.1811	0.1807	0.1804	0.1805	0.18	0.1796	0.1799	0.1807	0.1806	0.1808	0.181	0.1815	0.1812
MinD [1 µM]	0.1843	0.184	0.1834	0.1824	0.1815	0.1809	0.1802	0.1809	0.1806	0.1807	0.1804	0.1805	0.1809	0.1812	0.1824	0.1825	0.1836	0.1838	0.1839	0.1851	0.1851	0.1851	0.1862	0.1867	0.1865	0.1873	0.1878	0.1879	0.1876	0.1873	0.1873	0.1871	0.1869	0.1867	0.1869	0.1879	0.1882	0.1889	0.1897	0.1899	0.1906	0.1908	0.1917	0.1925	0.1934	0.194	0.1948	0.1956	0.196
MinD [2 µM]	0.1987	0.1997	0.2041	0.2045	0.204	0.2044	0.2041	0.2053	0.2058	0.2088	0.2078	0.209	0.2104	0.2114	0.2125	0.2143	0.2152	0.217	0.2189	0.2202	0.2224	0.223	0.2244	0.2265	0.2277	0.2292	0.2317	0.2333	0.2348	0.2369	0.2391	0.2393	0.242	0.2424	0.2438	0.247	0.2486	0.2477	0.2496	0.25	0.2519	0.2544	0.2534	0.2561	0.2579	0.2686	0.2595	0.2616	0.2635
MinD [4 µM]	0.2239	0.2285	0.2332	0.238	0.2401	0.2426	0.2469	0.2514	0.2559	0.2611	0.2671	0.2719	0.2795	0.2841	0.286	0.2925	0.299	0.3029	0.3095	0.3167	0.3215	0.3258	0.3315	0.3384	0.3433	0.3491	0.3539	0.3596	0.3654	0.3693	0.3739	0.3844	0.381	0.3846	0.3876	0.3905	0.3926	0.3961	0.3989	0.3989	0.4009	0.4002	0.4035	0.4014	0.4019	0.4016	0.4011	0.3996	0.3998
MinD [8 µM]	0.2499	0.2647	0.2766	0.2862	0.2961	0.3065	0.3168	0.328	0.3409	0.3536	0.3674	0.38	0.3929	0.4025	0.4143	0.4231	0.4315	0.4385	0.4443	0.4487	0.4521	0.4533	0.4544	0.4565	0.4564	0.457	0.4557	0.4539	0.4526	0.4525	0.45	0.4508	0.4495	0.4497	0.4484	0.4485	0.4495	0.4474	0.4498	0.4496	0.4483	0.4488	0.4475	0.4481	0.4475	0.4461	0.4468	0.4461	0.4452
MinD [12 µM]	0.2734	0.2923	0.3071	0.3204	0.3334	0.3457	0.361	0.3774	0.3939	0.4092	0.4227	0.4332	0.4446	0.4526	0.4574	0.4639	0.4686	0.4714	0.4749	0.4758	0.477	0.4781	0.4801	0.4796	0.4781	0.4774	0.4764	0.4773	0.4753	0.4744	0.4766	0.4755	0.4761	0.476	0.4738	0.4756	0.4793	0.474	0.4746	0.4744	0.4776	0.4733	0.474	0.4729	0.4719	0.4718	0.4724	0.4724	0.4715
MinD [16 µM]	0.2902	0.3092	0.3261	0.3402	0.3579	0.3753	0.3915	0.4054	0.4172	0.4283	0.437	0.4442	0.4497	0.4534	0.457	0.4594	0.462	0.4629	0.4629	0.4632	0.4641	0.4634	0.4637	0.4633	0.4628	0.4625	0.4618	0.4623	0.4627	0.4629	0.4624	0.463	0.4634	0.4631	0.4637	0.4628	0.4626	0.4626	0.4627	0.4624	0.461	0.4627	0.4604	0.4608	0.4599	0.4597	0.4598	0.4597	0.4591
Phosphate standard
Pi Standard [µM]	Lane 4	Lane 5	Average
0	0.128	0.114	0.121
5	0.1198	0.1226	0.1212
10	0.1344	0.1395	0.13695
15	0.1487	0.1489	0.1488
20	0.1581	0.1637	0.1609
50	0.2493	0.2459	0.2476
100	0.3898	0.3884	0.3891
His-MinD MW	31690	g/mole (Daltons)
	0.003169	mg of MinD per µM in 100µl
[truncated: 132 more columns]

## Sheet: Figure 1 C
Figure 1—source data 3							GraphPadPrism nonlinear fit for Vmax [nmol/mg/min]:						GraphPadPrism nonlinear fit for kcat [µM/min]:
													kcat
Final Plot source data							Best-fit values						Best-fit values
ATP [mM]	MinD [10 µM] activity [nmol/mg/min]						Et	= 10.00					Et	= 10.00
X	Mean	SD	N				kcat	1.95	(note: unconverted value, unit mismatch between Et [µM] and Vmax [nmol/mg/min])				kcat	0.6045	(per minute)
0	0	0	3				Km	0.1726					Km	0.1726
0.05	2.31368	0.516889	3				Vmax	19.5					Vmax	6.045
0.1	5.68303	0.683432	3				95% CI (profile likelihood)						95% CI (profile likelihood)
0.2	11.2253	0.61504	3				kcat	1.805 to 2.103					kcat	0.5595 to 0.6520
0.5	16.9611	1.93455	3				Km	0.1274 to 0.2317					Km	0.1274 to 0.2317
1	17.7397	0.66823	3				Goodness of Fit						Goodness of Fit
2	17.3746	0.508398	3				Degrees of Freedom	22					Degrees of Freedom	22
5	17.1371	1.20772	3				R squared	0.9427					R squared	0.9427
							Sum of Squares	66.78					Sum of Squares	6.417
							Sy.x	1.742					Sy.x	0.5401
Plot Source Data after background substraction, normalization and conversion							Constraints						Constraints
	MinD [10 µM] activity [nmol/mg/min]						Et	Et = 10					Et	Et = 10
ATP [mM]	Replicate 1	Replicate 2	Replicate 3
0	0	0	0				Number of points						Number of points
0.05	2.20371	2.8767	1.86062				# of X values	24					# of X values	24
0.1	6.03052	6.12289	4.89567				# Y values analyzed	24					# Y values analyzed	24
0.2	11.6256	11.5332	10.5171
0.5	17.8672	18.2763	14.7398										10 µM MinD: 0.3169 mg·ml⁻¹
1	17.1678	17.5769	18.4742										kcat [1/min]	0.6045
2	17.3526	17.8936	16.8775										kcat [1/h]	36.27
5	17.1678	18.3291	15.9142
Raw plate reader data
MinD [10 µM] + ATP [0-5 µM] + Liposomes [0.4 mg/ml]
MinD Row 1
Time [s]	0	60.1	120	180	240	300.1	360.1	420.1	480.1	540.1	600.1	660.1	720.1	780.1	840.1	900.1	960.1	1020.1	1080.1	1140.2	1200.2	1260.2	1320.2	1380.2	1440.2	1500.2	1560.2	1620.2	1680.2	1740.2	1800.2	1860.2	1920.2	1980.2	2040.2	2100.3	2160.3	2220.3	2280.3	2340.3	2400.3	2460.3	2520.3	2580.3	2640.3	2700.3	2760.3	2820.3	2880.3
ATP [0 µM]	0.1876	0.1871	0.1882	0.1872	0.1869	0.19	0.1874	0.1871	0.1873	0.1876	0.1883	0.1887	0.1892	0.19	0.1907	0.1917	0.1918	0.1931	0.1933	0.1933	0.1944	0.1948	0.1943	0.196	0.1954	0.195	0.1936	0.1918	0.1927	0.1915	0.1869	0.1857	0.1839	0.1823	0.1784	0.1781	0.1739	0.1738	0.177	0.1711	0.1687	0.1664	0.1669	0.1661	0.1639	0.1657	0.1615	0.1622	0.1596
ATP [0.05 µM]	0.1905	0.192	0.1938	0.1958	0.1976	0.2003	0.2024	0.2042	0.206	0.2079	0.2096	0.211	0.2124	0.2139	0.2155	0.2166	0.2178	0.2189	0.2201	0.2206	0.2217	0.2223	0.2235	0.224	0.225	0.2264	0.2277	0.2284	0.2293	0.23	0.2305	0.2309	0.2315	0.235	0.2341	0.2336	0.2334	0.2339	0.2325	0.2338	0.2335	0.2329	0.2338	0.2338	0.2332	0.2334	0.2326	0.2308	0.2327
ATP [0.1 µM]	0.2055	0.2106	0.2157	0.2215	0.2275	0.2334	0.2388	0.2447	0.2493	0.254	0.2587	0.2619	0.2658	0.2691	0.2714	0.2736	0.2759	0.2775	0.2789	0.2803	0.2815	0.2825	0.2844	0.2852	0.2866	0.287	0.2883	0.2884	0.2889	0.2903	0.2906	0.2916	0.2918	0.2938	0.2939	0.2934	0.2947	0.295	0.2955	0.2959	0.2968	0.2966	0.2965	0.2973	0.2977	0.2983	0.2986	0.2984	0.2989
ATP [0.2 µM]	0.2074	0.215	0.2245	0.2352	0.2449	0.255	0.2653	0.2755	0.2856	0.2957	0.3052	0.3131	0.3208	0.3277	0.335	0.3419	0.3466	0.3523	0.3564	0.3608	0.3634	0.3665	0.3697	0.3718	0.3744	0.3774	0.3792	0.382	0.3822	0.3843	0.3851	0.3878	0.3863	0.3875	0.3877	0.389	0.3902	0.3918	0.3913	0.3914	0.3914	0.3921	0.3909	0.3923	0.3945	0.3953	0.3959	0.3945	0.3948
ATP [0.5 µM]	0.226	0.2372	0.2501	0.2635	0.2785	0.2949	0.3107	0.3269	0.3428	0.3579	0.372	0.386	0.3977	0.4083	0.4175	0.4249	0.4311	0.4355	0.4394	0.4411	0.4426	0.4432	0.4437	0.4442	0.445	0.4441	0.4426	0.4437	0.4428	0.442	0.4424	0.441	0.4411	0.44	0.4397	0.4404	0.4387	0.4382	0.4378	0.438	0.4368	0.4367	0.4355	0.4352	0.4343	0.4347	0.4334	0.4335	0.4323
ATP [1 µM]	0.2261	0.2427	0.2561	0.2668	0.2801	0.294	0.3092	0.326	0.3426	0.3577	0.3729	0.3867	0.399	0.4109	0.4198	0.4277	0.4344	0.4386	0.4437	0.4465	0.4467	0.4469	0.4474	0.4469	0.4474	0.4468	0.4477	0.4475	0.4471	0.4474	0.4471	0.4476	0.4467	0.4466	0.4482	0.4455	0.4452	0.4453	0.445	0.4449	0.4456	0.444	0.4437	0.4437	0.4442	0.4446	0.4439	0.4443	0.4436
ATP [2 µM]	0.2451	0.265	0.2802	0.2945	0.3086	0.3225	0.3389	0.3548	0.3724	0.3867	0.3998	0.4122	0.4224	0.4316	0.4383	0.4444	0.4483	0.451	0.4533	0.4542	0.4557	0.4562	0.4564	0.4558	0.4561	0.4548	0.4541	0.4541	0.4533	0.453	0.4527	0.452	0.4513	0.4513	0.4509	0.451	0.4502	0.4503	0.4502	0.4499	0.4487	0.449	0.4485	0.4483	0.4481	0.4479	0.4476	0.4468	0.4469
ATP [5 µM]	0.2568	0.2939	0.3178	0.3369	0.3552	0.3748	0.3915	0.4067	0.42	0.4311	0.4411	0.4484	0.4546	0.4599	0.4626	0.4647	0.4666	0.4673	0.4685	0.4688	0.4686	0.4687	0.468	0.4678	0.4673	0.4669	0.4665	0.4655	0.4655	0.4647	0.4642	0.4633	0.4622	0.4621	0.461	0.4606	0.4601	0.4596	0.4593	0.4589	0.4585	0.4575	0.457	0.4563	0.4556	0.4551	0.454	0.4546	0.4536
MinD Row2
Time [s]	0	60.1	120	180.1	240.1	300.1	360.1	420.1	480.1	540.1	600.1	660.1	720.1	780.1	840.1	900.1	960.1	1020.1	1080.2	1140.2	1200.2	1260.2	1320.2	1380.2	1440.2	1500.2	1560.2	1620.2	1680.2	1740.2	1800.2	1860.2	1920.2	1980.3	2040.3	2100.3	2160.3	2220.3	2280.3	2340.3	2400.3	2460.3	2520.3	2580.3	2640.3	2700.3	2760.3	2820.4	2880.4
ATP [0 µM]	0.1941	0.1945	0.1936	0.1937	0.1932	0.1922	0.1919	0.1899	0.1899	0.1896	0.1898	0.1898	0.1896	0.19	0.1905	0.1903	0.1909	0.1907	0.1915	0.1915	0.1921	0.1923	0.1926	0.1926	0.1924	0.1907	0.1902	0.1891	0.1887	0.1866	0.1859	0.1853	0.1817	0.1802	0.1776	0.1811	0.1729	0.1737	0.1709	0.1681	0.1687	0.1676	0.1661	0.1652	0.164	0.163	0.1633	0.1595	0.1587
ATP [0.05 µM]	0.1899	0.1909	0.1935	0.1961	0.1978	0.2	0.2024	0.2041	0.2064	0.2079	0.2099	0.2115	0.2128	0.2147	0.2159	0.2174	0.2185	0.2192	0.2201	0.2208	0.2216	0.2215	0.2225	0.2228	0.2232	0.2239	0.2252	0.2253	0.2274	0.2264	0.2275	0.2282	0.2296	0.229	0.2289	0.2293	0.2298	0.2299	0.2298	0.2308	0.232	0.2316	0.2317	0.2304	0.2305	0.2302	0.2307	0.2294	0.2299
ATP [0.1 µM]	0.1954	0.203	0.2075	0.213	0.2185	0.2236	0.2282	0.2339	0.2383	0.2429	0.2467	0.2501	0.2534	0.2564	0.2566	0.2593	0.2608	0.2622	0.2637	0.2649	0.2659	0.2662	0.2677	0.2708	0.2699	0.2705	0.271	0.2717	0.2727	0.2725	0.2733	0.2737	0.2748	0.2749	0.2756	0.2764	0.2769	0.2773	0.2779	0.2788	0.2793	0.2803	0.2804	0.2806	0.2828	0.2824	0.2827	0.2828	0.2832
ATP [0.2 µM]	0.2099	0.2221	0.2288	0.2408	0.2497	0.2628	0.2738	0.2814	0.2885	0.2961	0.3039	0.3124	0.3175	0.3244	0.3283	0.3337	0.3382	0.341	0.3448	0.3478	0.3501	0.3524	0.3546	0.3628	0.3577	0.3627	0.3604	0.3638	0.363	0.3636	0.3704	0.3653	0.3665	0.3672	0.3671	0.3686	0.3693	0.3703	0.3704	0.3714	0.3718	0.3724	0.3725	0.3739	0.3736	0.3742	0.3745	0.3742	0.3747
ATP [0.5 µM]	0.22	0.2326	0.2444	0.2578	0.2734	0.2897	0.3056	0.3208	0.3359	0.3512	0.3672	0.3791	0.3911	0.4026	0.4117	0.4194	0.4259	0.4294	0.4326	0.4343	0.435	0.4357	0.4375	0.4368	0.4368	0.4373	0.437	0.4372	0.4354	0.4357	0.4359	0.4338	0.4332	0.4322	0.4324	0.4315	0.4317	0.43	0.4301	0.4303	0.4304	0.4392	0.4297	0.4261	0.4267	0.4272	0.4251	0.4252	0.4249
ATP [1 µM]	0.2216	0.2385	0.2553	0.2706	0.2844	0.3	0.3146	0.3285	0.3435	0.3562	0.3695	0.3847	0.3983	0.4109	0.4224	0.4288	0.4349	0.4395	0.4429	0.4457	0.4473	0.4477	0.4479	0.4476	0.4477	0.4475	0.447	0.4473	0.4469	0.4467	0.4461	0.446	0.4455	0.4455	0.4449	0.4449	0.4444	0.4433	0.4433	0.443	0.4428	0.4419	0.4416	0.4412	0.4409	0.4416	0.4403	0.4408	0.4399
ATP [2 µM]	0.2435	0.264	0.2781	0.2918	0.3057	0.3226	0.3384	0.3549	0.3702	0.3846	0.3977	0.4099	0.4203	0.4292	0.4372	0.4427	0.4481	0.4511	0.4536	0.4548	0.4551	0.4559	0.4565	0.4558	0.4555	0.4556	0.4552	0.4551	0.4544	0.4552	0.4552	0.4544	0.4536	0.454	0.4531	0.4525	0.4525	0.4526	0.4523	0.4522	0.4518	0.4517	0.4505	0.4496	0.4499	0.4496	0.4506	0.4505	0.4501
ATP [5 µM]	0.2407	0.2825	0.3084	0.3269	0.3451	0.3609	0.3779	0.3968	0.4125	0.4258	0.436	0.4435	0.4496	0.4552	0.4585	0.4608	0.4621	0.4659	0.4628	0.4634	0.4653	0.4632	0.4625	0.4614	0.4613	0.4607	0.4622	0.4597	0.4593	0.4586	0.4589	0.4589	0.4575	0.4562	0.4555	0.4545	0.4539	0.4534	0.4529	0.4523	0.4513	0.4513	0.4502	0.4494	0.45	0.4497	0.4474	0.4468	0.4465
MinD Row 3
Time [s]	0	60.1	120	180.1	240.1	300.1	360.1	420.1	480.1	540.1	600.1	660.1	720.1	780.1	840.1	900.1	960.1	1020.1	1080.2	1140.2	1200.2	1260.2	1320.2	1380.2	1440.2	1500.2	1560.2	1620.2	1680.2	1740.2	1800.2	1860.2	1920.2	1980.3	2040.3	2100.3	2160.3	2220.3	2280.3	2340.3	2400.3	2460.3	2520.3	2580.3	2640.3	2700.3	2760.3	2820.4	2880.4
ATP [0 µM]	0.1904	0.1903	0.1907	0.1912	0.1907	0.1913	0.1907	0.1904	0.1896	0.1903	0.1905	0.1909	0.1944	0.1935	0.1954	0.1959	0.197	0.1977	0.1995	0.2009	0.2022	0.202	0.2024	0.2016	0.2024	0.2026	0.2017	0.2015	0.198	0.1962	0.1943	0.1939	0.1932	0.1887	0.1889	0.1865	0.1853	0.1812	0.1808	0.1796	0.1782	0.1729	0.173	0.1714	0.1701	0.1767	0.1738	0.1772	0.1676
ATP [0.05 µM]	0.2021	0.2047	0.2044	0.2063	0.2083	0.21	0.2111	0.2129	0.2146	0.2158	0.2177	0.2187	0.2203	0.2219	0.2227	0.2241	0.2252	0.2263	0.2269	0.2281	0.2284	0.2298	0.2304	0.2308	0.2322	0.2333	0.2344	0.2353	0.2371	0.2375	0.2387	0.2403	0.2403	0.2417	0.2422	0.2427	0.2425	0.2426	0.2427	0.2432	0.2442	0.2447	0.2419	0.2423	0.2422	0.2409	0.2404	0.2403	0.238
ATP [0.1 µM]	0.2028	0.2089	0.2126	0.2139	0.2187	0.2251	0.2283	0.233	0.2378	0.2435	0.2468	0.2499	0.2533	0.2569	0.2595	0.2623	0.2646	0.2662	0.2692	0.27	0.2715	0.2726	0.2739	0.275	0.2762	0.2769	0.2779	0.2789	0.2796	0.2803	0.2825	0.2817	0.2825	0.2832	0.2827	0.2834	0.2846	0.2849	0.2848	0.2855	0.2862	0.287	0.2872	0.2875	0.288	0.2888	0.2894	0.2892	0.2905
ATP [0.2 µM]	0.2043	0.2129	0.2185	0.227	0.2362	0.2451	0.2538	0.2643	0.273	0.2811	0.2899	0.2984	0.3064	0.3141	0.3195	0.3253	0.3321	0.3368	0.3416	0.3466	0.3509	0.3543	0.3582	0.3603	0.3638	0.3663	0.3447	0.346	0.3479	0.3493	0.3511	0.3527	0.3526	0.3542	0.3552	0.3565	0.3566	0.3575	0.3587	0.3592	0.3613	0.3601	0.3604	0.3608	0.3616	0.3617	0.3622	0.363	0.3623
ATP [0.5 µM]	0.2307	0.2439	0.2581	0.2734	0.2892	0.3053	0.3215	0.3377	0.354	0.3692	0.3844	0.3983	0.4113	0.4229	0.4332	0.4409	0.448	0.4523	0.4564	0.4599	0.4614	0.4624	0.4624	0.4629	0.4633	0.4637	0.463	0.4628	0.4637	0.4627	0.4625	0.4622	0.4307	0.4303	0.4291	0.4296	0.4278	0.4276	0.4267	0.4275	0.4264	0.4261	0.4252	0.4246	0.424	0.4247	0.4217	0.4214	0.4216
ATP [1 µM]	0.2154	0.2322	0.2447	0.2554	0.2668	0.2787	0.2905	0.304	0.3174	0.3303	0.3437	0.3566	0.3687	0.3803	0.39	0.3987	0.4064	0.4128	0.4174	0.421	0.4243	0.4258	0.4269	0.4278	0.4287	0.4288	0.4289	0.4299	0.4295	0.4294	0.429	0.4287	0.429	0.4295	0.4288	0.4287	0.4282	0.4288	0.4289	0.4283	0.4281	0.4276	0.4277	0.428	0.4283	0.4285	0.4287	0.4279	0.4273
ATP [2 µM]	0.2332	0.2567	0.2753	0.2893	0.302	0.3177	0.3331	0.3505	0.3629	0.3769	0.3912	0.4034	0.4146	0.4225	0.4319	0.4345	0.4395	0.4411	0.4421	0.4423	0.4418	0.442	0.4413	0.4416	0.4402	0.4412	0.442	0.4396	0.4373	0.4377	0.4384	0.4371	0.4369	0.4375	0.4372	0.4363	0.4366	0.4363	0.4364	0.4364	0.4352	0.4359	0.4344	0.4348	0.4342	0.4343	0.4336	0.4338	0.433
ATP [5 µM]	0.2473	0.2864	0.306	0.3255	0.3443	0.3593	0.3749	0.3911	0.401	0.4121	0.4209	0.4268	0.4329	0.4372	0.4391	0.4411	0.4426	0.4423	0.4409	0.4405	0.4421	0.4388	0.4385	0.4366	0.4357	0.435	0.4324	0.4309	0.4305	0.4305	0.4295	0.4282	0.4269	0.4275	0.426	0.4283	0.4303	0.4319	0.4319	0.4308	0.4289	0.4245	0.4238	0.4229	0.424	0.4243	0.4276	0.4273	0.4251
Phosphate standard
Pi Standard [µM]	Lane 4	Lane 5	Average
0	0.1371	0.1323	0.1347
2	0.15	0.136	0.143
5	0.149	0.1402	0.1446
10	0.1479	0.1482	0.14805
20	0.1726	0.1751	0.17385
50	0.2574	0.2685	0.26295
100	0.4063	0.4017	0.404
150	0.4597	0.4505	0.4551
His-MinD MW	31690	g/mole (Daltons)
	0.003169	mg of MinD per µM in 100µl
[truncated: 132 more columns]

## Sheet: Figure 1 D
Figure 1—source data 4						GraphPad Michaelis-Menten Least squares fit
						Michaelis-Menten
Final Plot source data						Best-fit values
Liposomes [mg/ml]	MinD [6 µM] activity [nmol/mg/min]					Vmax	22.05
X	Mean	SD	N			Km	0.04368
0.005	1.4333	0.079	3			95% CI (profile likelihood)
0.01	2.44854	0.260313	3			Vmax	20.20 to 24.08
0.02	4.9369	0.243197	3			Km	0.03288 to 0.05790
0.05	13.1883	0.452194	3			Goodness of Fit
0.1	17.946	0.932863	3			Degrees of Freedom	22
0.2	17.8181	0.844935	3			R squared	0.9581
0.5	18.8418	0.158008	3			Sum of Squares	58.83
						Sy.x	1.635
Plot Source Data after background substraction, normalization and conversion						Constraints
	MinD [6 µM] activity [nmol/mg/min]					Km	Km > 0
Liposomes [mg/ml]	MinD Well 1	MinD Well 2	MinD Well 3
0	0	0	0			Number of points
0.005	1.40343	1.37358	1.52287			# of X values	24
0.01	2.26938	2.32911	2.74714			# Y values analyzed	24
0.02	5.10611	4.65821	5.04639
0.05	13.7059	12.9892	12.8698
0.1	16.8711	18.5432	18.4238
0.2	18.5731	16.9055	17.9759
0.5	18.7821	19.021	18.7224
Raw plate reader data
MinD [6 µM] + ATP [2 µM] + Liposomes [0-0.5 mg/ml]
MinD Row 1
Time [s]	0	60.1	120	180.1	240.1	300.1	360.1	420.1	480.1	540.1	600.1	660.1	720.1	780.1	840.1	900.1	960.1	1020.1	1080.2	1140.2	1200.2	1260.2	1320.2	1380.2	1440.2	1500.2	1560.2	1620.2	1680.2	1740.2	1800.2	1860.2	1920.2	1980.3	2040.3	2100.3	2160.3	2220.3	2280.3	2340.3	2400.3	2460.3	2520.3	2580.3	2640.3	2700.3	2760.3	2820.4	2880.4
Lipo [0 mg/ml]	0.2016	0.2023	0.2022	0.2014	0.2018	0.2016	0.2006	0.1993	0.1995	0.198	0.1983	0.197	0.1956	0.1958	0.1949	0.1943	0.1943	0.1942	0.1931	0.1943	0.1938	0.1925	0.1923	0.1922	0.1918	0.1911	0.1903	0.1911	0.1896	0.1891	0.189	0.1887	0.1882	0.1878	0.182	0.1816	0.1811	0.1803	0.18	0.18	0.1799	0.1789	0.1789	0.1779	0.1778	0.1772	0.1769	0.1763	0.1764
Lipo [0.005 mg/ml]	0.1999	0.1961	0.1965	0.1976	0.1973	0.197	0.1972	0.1974	0.1977	0.1979	0.199	0.1985	0.1982	0.1985	0.1992	0.1996	0.1997	0.2004	0.2004	0.2013	0.2013	0.2016	0.2025	0.2021	0.2029	0.2032	0.2039	0.2038	0.2039	0.2047	0.2047	0.2054	0.2057	0.2059	0.2062	0.2069	0.2068	0.2071	0.2076	0.208	0.2082	0.2087	0.2089	0.2094	0.2097	0.21	0.2101	0.2109	0.2112
Lipo [0.01 mg/ml]	0.1948	0.1973	0.1971	0.1982	0.1991	0.1991	0.1997	0.2007	0.2017	0.2027	0.2057	0.2051	0.2066	0.2077	0.209	0.2091	0.2101	0.2112	0.2117	0.2131	0.2131	0.2137	0.2157	0.2156	0.2171	0.2181	0.2193	0.2204	0.2216	0.2238	0.2235	0.2247	0.2257	0.2266	0.2275	0.2289	0.2294	0.2306	0.2312	0.2324	0.2337	0.2343	0.2356	0.2366	0.2372	0.2386	0.2392	0.2404	0.2421
Lipo [0.02 mg/ml]	0.2077	0.2114	0.2137	0.2156	0.2172	0.2193	0.2209	0.2233	0.2245	0.2264	0.229	0.2307	0.2327	0.2348	0.2373	0.2398	0.2421	0.245	0.2473	0.2496	0.2524	0.2548	0.2579	0.2594	0.2624	0.2649	0.2673	0.2695	0.2721	0.2764	0.2782	0.281	0.2836	0.2863	0.2881	0.2915	0.2934	0.2962	0.2989	0.3011	0.3039	0.3064	0.3088	0.311	0.3136	0.3165	0.3188	0.3213	0.324
Lipo [0.05 mg/ml]	0.2496	0.2535	0.2589	0.2649	0.2693	0.2747	0.281	0.2866	0.2914	0.2982	0.3037	0.3099	0.316	0.3231	0.3305	0.3362	0.344	0.3515	0.3594	0.3644	0.3758	0.3855	0.392	0.3991	0.4064	0.4135	0.4205	0.4271	0.4333	0.4419	0.4504	0.453	0.4602	0.4675	0.4733	0.4829	0.4847	0.4936	0.4958	0.5	0.5054	0.5105	0.5151	0.5195	0.5235	0.5269	0.5306	0.5334	0.5357
Lipo [0.1 mg/ml]	0.2547	0.262	0.2685	0.2758	0.2838	0.293	0.3011	0.3108	0.3198	0.3291	0.3397	0.3491	0.3575	0.3662	0.3749	0.3842	0.3922	0.4017	0.4115	0.4193	0.4285	0.4374	0.4467	0.4544	0.4628	0.4707	0.4793	0.4875	0.4941	0.5017	0.5076	0.514	0.5193	0.5244	0.5287	0.5328	0.5357	0.5381	0.5403	0.5414	0.5429	0.5441	0.5447	0.5452	0.5456	0.5459	0.5471	0.5469	0.547
Lipo [0.2 mg/ml]	0.2349	0.2413	0.2486	0.2562	0.2645	0.2724	0.2805	0.283	0.291	0.2988	0.3085	0.3185	0.3282	0.3387	0.3491	0.3586	0.3683	0.3788	0.3879	0.3972	0.4056	0.4151	0.4241	0.4317	0.44	0.4457	0.4524	0.4586	0.4626	0.467	0.471	0.4744	0.477	0.4788	0.4793	0.4817	0.4817	0.4827	0.4836	0.4841	0.4845	0.483	0.4836	0.4837	0.4827	0.4829	0.4827	0.483	0.4826
Lipo [0.5 mg/ml]	0.2391	0.2505	0.2607	0.2712	0.2808	0.2918	0.2996	0.3108	0.3224	0.3347	0.3468	0.3596	0.3746	0.3854	0.3967	0.4069	0.4184	0.4269	0.435	0.442	0.4517	0.4561	0.462	0.4663	0.4703	0.4726	0.4756	0.4767	0.4776	0.4793	0.4791	0.4802	0.4808	0.4806	0.4796	0.4802	0.4796	0.4799	0.4797	0.4794	0.48	0.4796	0.4794	0.4798	0.4797	0.48	0.4788	0.4791	0.4792
MinD Row2
Time [s]	0	60.1	120	180.1	240.1	300.1	360.1	420.1	480.1	540.1	600.1	660.1	720.1	780.1	840.1	900.1	960.1	1020.1	1080.2	1140.2	1200.2	1260.2	1320.2	1380.2	1440.2	1500.2	1560.2	1620.2	1680.2	1740.2	1800.2	1860.2	1920.2	1980.3	2040.3	2100.3	2160.3	2220.3	2280.3	2340.3	2400.3	2460.3	2520.3	2580.3	2640.3	2700.3	2760.3	2820.4	2880.4
Lipo [0 mg/ml]	0.2049	0.2073	0.2075	0.2074	0.2073	0.2072	0.2066	0.2068	0.2063	0.2059	0.2062	0.1892	0.1885	0.1882	0.1882	0.1878	0.187	0.1868	0.1865	0.1857	0.1849	0.1844	0.1848	0.184	0.1841	0.1834	0.1832	0.183	0.1821	0.1826	0.1817	0.1813	0.1815	0.1806	0.1802	0.1804	0.1799	0.179	0.1789	0.1786	0.1781	0.1773	0.1773	0.1773	0.1767	0.1763	0.1757	0.1755	0.1753
Lipo [0.005 mg/ml]	0.1997	0.2002	0.2009	0.2012	0.2024	0.2024	0.2025	0.203	0.203	0.2033	0.204	0.2039	0.2041	0.2042	0.2051	0.2051	0.2055	0.2061	0.2067	0.2066	0.2071	0.2073	0.2082	0.2083	0.2089	0.2092	0.2095	0.2101	0.2104	0.211	0.2113	0.2119	0.2126	0.2126	0.2128	0.2136	0.2137	0.2144	0.2143	0.2153	0.2155	0.2153	0.216	0.2169	0.2169	0.2176	0.2174	0.2185	0.2188
Lipo [0.01 mg/ml]	0.201	0.2048	0.2073	0.2076	0.2078	0.2081	0.2082	0.2092	0.21	0.2102	0.211	0.211	0.2122	0.2133	0.2141	0.2151	0.2161	0.2173	0.218	0.2195	0.2203	0.2209	0.2225	0.2229	0.2243	0.2253	0.2262	0.2267	0.2278	0.2295	0.2301	0.2313	0.232	0.2332	0.2337	0.2355	0.2364	0.2372	0.2385	0.2399	0.2406	0.2409	0.2422	0.2433	0.244	0.2457	0.2461	0.2476	0.2485
Lipo [0.02 mg/ml]	0.1905	0.1957	0.1986	0.2006	0.2021	0.2037	0.2052	0.2067	0.2089	0.2101	0.2124	0.2137	0.2151	0.2171	0.2196	0.2214	0.2235	0.2263	0.2287	0.2313	0.2334	0.2354	0.2381	0.24	0.2394	0.2418	0.2446	0.2467	0.2485	0.2511	0.2533	0.2561	0.2582	0.2605	0.2627	0.2656	0.2681	0.2703	0.2724	0.2745	0.2773	0.2791	0.282	0.2845	0.2866	0.2891	0.2916	0.2939	0.2961
Lipo [0.05 mg/ml]	0.235	0.2377	0.2441	0.2506	0.2553	0.2614	0.2673	0.2727	0.2774	0.2844	0.2906	0.297	0.3027	0.3074	0.3158	0.3215	0.329	0.3355	0.3442	0.3505	0.3604	0.3665	0.3743	0.3812	0.3875	0.3956	0.4015	0.4084	0.4146	0.4213	0.4284	0.4344	0.4422	0.4482	0.4537	0.4626	0.4667	0.4723	0.4779	0.4837	0.4892	0.4944	0.4988	0.5044	0.509	0.5137	0.5171	0.5204	0.5215
Lipo [0.1 mg/ml]	0.2222	0.2322	0.2408	0.25	0.2543	0.2608	0.2688	0.2769	0.2846	0.2932	0.302	0.3109	0.3214	0.3302	0.3414	0.3518	0.3621	0.3715	0.3815	0.3905	0.4008	0.4097	0.4201	0.428	0.4367	0.446	0.4537	0.4614	0.4693	0.4759	0.4821	0.488	0.4935	0.4979	0.5021	0.5063	0.5089	0.5106	0.5135	0.5146	0.5168	0.5181	0.5188	0.5192	0.519	0.5195	0.5205	0.5193	0.5198
Lipo [0.2 mg/ml]	0.2893	0.2871	0.2732	0.2811	0.2877	0.2922	0.3033	0.3056	0.3122	0.3191	0.3273	0.3352	0.3435	0.3426	0.3534	0.3621	0.3715	0.3784	0.3889	0.3968	0.4102	0.42	0.4274	0.4426	0.4435	0.4566	0.4623	0.4702	0.4794	0.4861	0.4944	0.4991	0.5105	0.515	0.5194	0.5284	0.5325	0.5369	0.5434	0.5508	0.5503	0.5541	0.5567	0.56	0.5624	0.5656	0.5673	0.5669	0.5672
Lipo [0.5 mg/ml]	0.2485	0.2592	0.2697	0.2699	0.2784	0.2869	0.2953	0.3049	0.3142	0.3238	0.3357	0.3495	0.3613	0.3726	0.3821	0.3932	0.4038	0.4133	0.423	0.4329	0.4415	0.4513	0.4604	0.4676	0.4752	0.4815	0.488	0.4926	0.4972	0.5001	0.5028	0.5055	0.5084	0.5095	0.511	0.512	0.5119	0.5132	0.5135	0.5131	0.5137	0.5133	0.5133	0.5137	0.5134	0.5137	0.5129	0.5129	0.5135
MinD Row3
Time [s]	0	60.1	120	180.1	240.1	300.1	360.1	420.1	480.1	540.1	600.1	660.1	720.1	780.1	840.1	900.1	960.1	1020.1	1080.2	1140.2	1200.2	1260.2	1320.2	1380.2	1440.2	1500.2	1560.2	1620.2	1680.2	1740.2	1800.2	1860.2	1920.2	1980.3	2040.3	2100.3	2160.3	2220.3	2280.3	2340.3	2400.3	2460.3	2520.3	2580.3	2640.3	2700.3	2760.3	2820.4	2880.4
Lipo [0 mg/ml]	0.2372	0.2386	0.2393	0.2394	0.2403	0.2399	0.2399	0.2402	0.2399	0.24	0.2399	0.2395	0.2389	0.2385	0.2381	0.2379	0.2375	0.237	0.2366	0.2267	0.226	0.2248	0.2246	0.2241	0.224	0.224	0.2234	0.2227	0.222	0.2222	0.2212	0.2206	0.22	0.2194	0.2186	0.2187	0.2176	0.217	0.2169	0.2163	0.2158	0.2149	0.2144	0.2142	0.2134	0.213	0.2128	0.2122	0.2118
Lipo [0.005 mg/ml]	0.1942	0.1978	0.1997	0.1995	0.2002	0.1967	0.1967	0.1971	0.1975	0.1977	0.1989	0.1999	0.2	0.2007	0.2012	0.2019	0.2018	0.2023	0.2028	0.2026	0.2027	0.2029	0.2051	0.2044	0.2054	0.2058	0.2067	0.2072	0.2072	0.2085	0.2084	0.2092	0.2099	0.2104	0.2109	0.212	0.2122	0.2126	0.2134	0.214	0.2142	0.2147	0.2158	0.2158	0.2165	0.2172	0.217	0.2183	0.2189
Lipo [0.01 mg/ml]	0.1962	0.1985	0.1931	0.1938	0.1942	0.1948	0.1951	0.196	0.1967	0.1968	0.1987	0.1984	0.1994	0.2007	0.2023	0.2032	0.2037	0.2047	0.2063	0.2079	0.2075	0.2091	0.2108	0.2112	0.2118	0.2131	0.2147	0.2155	0.216	0.2172	0.2175	0.219	0.2203	0.2212	0.2224	0.2232	0.2238	0.225	0.2269	0.2273	0.228	0.2297	0.2308	0.2317	0.2322	0.2342	0.2348	0.2355	0.2361
Lipo [0.02 mg/ml]	0.213	0.217	0.2198	0.2211	0.2223	0.2235	0.2252	0.2269	0.2287	0.2304	0.233	0.2175	0.2195	0.2216	0.2243	0.2267	0.2287	0.2313	0.2341	0.2361	0.2386	0.2406	0.2432	0.2448	0.2485	0.2496	0.2529	0.2551	0.2571	0.259	0.2616	0.2645	0.2667	0.2689	0.2711	0.2734	0.2756	0.2777	0.28	0.2825	0.285	0.2879	0.2903	0.2925	0.2949	0.2975	0.299	0.301	0.3037
Lipo [0.05 mg/ml]	0.2302	0.2405	0.2473	0.2527	0.2571	0.2626	0.2679	0.2732	0.278	0.2835	0.2892	0.2944	0.2994	0.3056	0.3126	0.3197	0.3267	0.3336	0.3402	0.3467	0.3532	0.3602	0.3669	0.3731	0.3801	0.3868	0.3928	0.3997	0.406	0.4125	0.4191	0.4255	0.4324	0.4384	0.4443	0.4515	0.4572	0.4621	0.4683	0.4739	0.4787	0.483	0.4877	0.4928	0.4964	0.5009	0.5038	0.5076	0.5099
Lipo [0.1 mg/ml]	0.2281	0.2382	0.2459	0.2535	0.2608	0.2676	0.2753	0.284	0.2921	0.2993	0.3088	0.3184	0.3256	0.3359	0.3456	0.3551	0.3653	0.3763	0.385	0.3944	0.4041	0.4125	0.4232	0.4311	0.4405	0.4481	0.4576	0.4655	0.4739	0.4815	0.4879	0.4954	0.5006	0.5067	0.5111	0.5149	0.5192	0.5225	0.5247	0.5268	0.5283	0.5288	0.5308	0.5308	0.5317	0.5322	0.5315	0.5316	0.5317
Lipo [0.2 mg/ml]	0.2063	0.2128	0.2199	0.227	0.2341	0.2419	0.249	0.2587	0.2674	0.2773	0.2866	0.296	0.3052	0.3151	0.3253	0.3346	0.3449	0.3537	0.3631	0.3723	0.382	0.3907	0.4	0.4081	0.4166	0.4242	0.4316	0.4386	0.4449	0.4509	0.4563	0.4613	0.4658	0.4682	0.4715	0.474	0.4757	0.4767	0.4783	0.4793	0.4795	0.4798	0.4801	0.4797	0.4808	0.4804	0.4807	0.481	0.4809
Lipo [0.5 mg/ml]	0.2391	0.2505	0.2607	0.2712	0.2808	0.2918	0.2996	0.3108	0.3224	0.3347	0.3468	0.3596	0.3746	0.3854	0.3967	0.4069	0.4184	0.4269	0.435	0.442	0.4517	0.4561	0.462	0.4663	0.4703	0.4726	0.4756	0.4767	0.4776	0.4793	0.4791	0.4802	0.4808	0.4806	0.4796	0.4802	0.4796	0.4799	0.4797	0.4794	0.48	0.4796	0.4794	0.4798	0.4797	0.48	0.4788	0.4791	0.4792
Phosphate standards
Pi Standard [µM]	Lane 4	Lane 5	Average
0	0.1623	0.1615	0.1619
2	0.1635	0.1631	0.1633
5	0.1728	0.1715	0.17215
10	0.1765	0.1815	0.179
20	0.2057	0.2051	0.2054
50	0.2662	0.296	0.2811
100	0.419	0.4251	0.42205
150	0.5575	0.5475	0.5525
His-MinD MW	31690	g/mole (Daltons)
	0.003169	mg of MinD per µM in 100µl
[truncated: 132 more columns]

## Sheet: Figure 1—figure supplement 1
Figure 1—figure supplement 1—source data 1
SDS-PAGE Gel
Western blot

## Sheet: Figure 1—figure supplement 2
Figure 1—figure supplement 2—source data 1
DATA NORMALIZED AND SYNCHRONIZED FOR SEC INJECTION TIME									RAW DATA
MinD	Inject: 4.59	MinD G12V	Inject: 4.73	MinD K16A	Inject: 4.54	MinD D40A	Inject: 4.62		MinD	Inject: 4.59	MinD G12V	Inject: 4.73	MinD K16A	Inject: 4.54	MinD D40A	Inject: 4.62			SEC Standard 2025001:10_UV1_280nm				Standard Calibration Curve
ml	mAU	ml	mAU	ml	mAU	ml	mAU		ml	mAU	ml	mAU	ml	mAU	ml	mAU			ml	mAU			Peak [ml]	MW [kDa]	mAU [280 nm]
0	2.261	0	0.046	0	3.068	0	-0.009		0	949.632	0	5.286	0	-18.035	0	553.585			0	-1.483			9.58412	670	300.976
0.045	0.647	0.045	3.542	0.045	10.879	0.0451681	-0.011		0.045	939.205	0.045	12.876	0.045	-19.062	0.0451681	553.645			0.0399338	0.022			12.8587	158	398.454
0.09	-0.221	0.09	2.424	0.09	4.834	0.0903362	-0.003		0.09	933.385	0.09	8.646	0.09	-20.098	0.0903362	553.15			0.0798676	0.081			15.4544	44	221.032
0.135	-0.288	0.135	1.223	0.135	0.941	0.135504	0.016		0.135	933.484	0.135	10.017	0.135	-20.659	0.135504	554.309			0.119801	0.526			17.3313	17	424.996
0.179	-0.257	0.179	1.221	0.18	0.866	0.180672	-0.002		0.179	933.529	0.179	10.531	0.18	-20.99	0.180672	555.139			0.159735	1.794			20.2864	1.35	532.304
0.224	-0.144	0.224	1.432	0.225	0.862	0.225841	0		0.224	932.838	0.224	9.491	0.225	-21.19	0.225841	553.527			0.199669	1.397
0.269	-0.035	0.269	1.4	0.27	0.047	0.271009	0.016		0.269	932.552	0.269	8.852	0.27	-21.312	0.271009	552.673			0.239603	1.006			Peak [ml]	Log10(MW [kDa])	mAU [280 nm]
0.314	0.049	0.314	1.324	0.315	-0.025	0.316177	-0.001		0.314	932.401	0.314	8.614	0.315	-21.456	0.316177	552.353			0.279537	0.726			9.58412	2.82607	300.976
0.359	0.087	0.359	1.339	0.36	0.607	0.361345	-0.004		0.359	932.38	0.359	8.454	0.36	-21.509	0.361345	552.188			0.319471	0.581			12.8587	2.19866	398.454
0.404	0.08	0.404	1.387	0.405	1.65	0.406513	-0.013		0.404	932.288	0.404	8.299	0.405	-21.586	0.406513	552.07			0.359404	0.484			15.4544	1.64345	221.032
0.449	0.185	0.449	1.475	0.45	2.707	0.451681	-0.002		0.449	932.318	0.449	8.073	0.45	-21.574	0.451681	552.006			0.399338	0.406			17.3313	1.23045	424.996
0.493	0.322	0.494	1.603	0.496	3.667	0.496849	-0.01		0.493	932.289	0.494	8.121	0.496	-21.619	0.496849	551.928			0.439272	0.341			20.2864	0.130334	532.304	outlier
0.538	0.202	0.538	1.629	0.541	4.411	0.542017	-0.021		0.538	932.336	0.538	8.129	0.541	-21.669	0.542017	551.876			0.479206	0.318
0.583	0.219	0.583	1.653	0.586	4.903	0.587185	-0.009		0.583	932.396	0.583	8.136	0.586	-21.713	0.587185	551.845			0.51914	0.268			y = -0.206x + 4.8188			-0.206
0.628	0.328	0.628	1.711	0.631	5.368	0.632353	-0.016		0.628	932.515	0.628	8.108	0.631	-21.678	0.632353	551.824			0.559074	0.271			log10(MW) = 0.206*ml + 4.8188			4.8188
0.673	0.47	0.673	1.7	0.676	5.71	0.677522	-0.006		0.673	932.766	0.673	8.098	0.676	-21.711	0.677522	551.789			0.599007	0.269			ml=(log10(MW)-4.8188)/-0.206
0.718	0.348	0.718	1.837	0.721	6.031	0.72269	-0.011		0.718	932.68	0.718	8.148	0.721	-21.756	0.72269	551.754			0.638941	0.245
0.762	0.667	0.763	1.924	0.766	6.601	0.767858	-0.019		0.762	932.797	0.763	8.125	0.766	-21.714	0.767858	551.72			0.678875	0.213
0.807	0.804	0.808	1.93	0.811	7.336	0.813026	-0.033		0.807	932.773	0.808	8.179	0.811	-21.737	0.813026	551.706			0.718809	0.197
0.852	1.006	0.853	2.006	0.856	8.54	0.858194	-0.04		0.852	932.842	0.853	8.227	0.856	-21.776	0.858194	551.683			0.758743	0.178
0.897	1.084	0.897	2.082	0.901	10.498	0.903362	-0.027		0.897	932.939	0.897	8.243	0.901	-21.753	0.903362	551.66			0.798676	0.168			kDa	log10(kDa)	ml
0.942	1.431	0.942	2.192	0.946	13.327	0.94853	-0.028		0.942	933.084	0.942	8.368	0.946	-21.775	0.94853	551.648			0.83861	0.196			31.69	1.50092	-0.0692053
0.987	1.849	0.987	2.272	0.991	17.37	0.993698	-0.032		0.987	933.106	0.987	8.342	0.991	-21.841	0.993698	551.63			0.878544	0.141			63.38	1.80195	0.134883
1.032	2.106	1.032	2.264	1.036	21.893	1.03887	-0.038		1.032	933.283	1.032	8.364	1.036	-21.743	1.03887	551.647			0.918478	0.139			44.2996	1.6464	15.4
1.076	2.244	1.077	2.447	1.081	25.339	1.08403	-0.012		1.076	933.369	1.077	8.483	1.081	-21.748	1.08403	551.646			0.958412	0.172
1.121	2.723	1.122	2.483	1.126	26.978	1.1292	-0.02		1.121	933.568	1.122	8.592	1.126	-21.753	1.1292	551.642			0.998346	0.184
1.166	2.84	1.167	2.505	1.171	27.25	1.17437	-0.024		1.166	933.626	1.167	8.616	1.171	-21.745	1.17437	551.636			1.03828	0.15
1.211	3.01	1.212	2.513	1.216	27.342	1.21954	-0.005		1.211	933.598	1.212	8.667	1.216	-21.788	1.21954	551.638			1.07821	0.137
1.256	3.178	1.256	2.602	1.261	27.902	1.26471	-0.02		1.256	933.664	1.256	8.682	1.261	-21.793	1.26471	551.63			1.11815	0.13
1.301	3.534	1.301	2.603	1.306	29.336	1.30987	-0.023		1.301	933.959	1.301	8.678	1.306	-21.763	1.30987	551.618			1.15808	0.113
1.346	3.592	1.346	2.73	1.351	31.428	1.35504	-0.043		1.346	934.029	1.346	8.845	1.351	-21.744	1.35504	551.612			1.19801	0.111
1.39	3.667	1.391	2.827	1.397	34.218	1.40021	-0.061		1.39	934.194	1.391	8.824	1.397	-21.746	1.40021	551.597			1.23795	0.128
1.435	3.883	1.436	2.864	1.442	37.281	1.44538	-0.062		1.435	934.217	1.436	8.934	1.442	-21.795	1.44538	551.588			1.27788	0.129
1.48	3.845	1.481	2.973	1.487	40.322	1.49055	-0.059		1.48	934.115	1.481	9.14	1.487	-21.816	1.49055	551.569			1.31782	0.129
1.525	4.01	1.526	3.04	1.532	42.56	1.53572	-0.05		1.525	934.35	1.526	9.159	1.532	-21.782	1.53572	551.563			1.35775	0.143
1.57	4.187	1.571	3.148	1.577	43.659	1.58088	-0.058		1.57	934.644	1.571	9.283	1.577	-21.705	1.58088	551.561			1.39768	0.172
1.615	4.368	1.615	3.128	1.622	43.43	1.62605	-0.055		1.615	934.635	1.615	9.432	1.622	-21.781	1.62605	551.555			1.43762	0.186
1.66	4.344	1.66	3.202	1.667	42.347	1.67122	-0.053		1.66	934.737	1.66	9.435	1.667	-21.792	1.67122	551.554			1.47755	0.197
1.704	4.414	1.705	3.243	1.712	41.264	1.71639	-0.042		1.704	934.837	1.705	9.464	1.712	-21.777	1.71639	551.532			1.51749	0.213
1.749	4.372	1.75	3.223	1.757	40.358	1.76156	-0.038		1.749	934.899	1.75	9.618	1.757	-21.827	1.76156	551.527			1.55742	0.188
1.794	4.395	1.795	3.18	1.802	39.233	1.80672	-0.046		1.794	935.008	1.795	9.598	1.802	-21.758	1.80672	551.518			1.59735	0.192
1.839	4.374	1.84	3.476	1.847	37.534	1.85189	-0.026		1.839	935.107	1.84	9.685	1.847	-21.72	1.85189	551.536			1.63729	0.2
1.884	4.397	1.885	3.434	1.892	35.951	1.89706	-0.043		1.884	935.259	1.885	9.81	1.892	-21.754	1.89706	551.552			1.67722	0.186
1.929	4.417	1.93	3.495	1.937	34.27	1.94223	-0.061		1.929	935.332	1.93	9.884	1.937	-21.783	1.94223	551.556			1.71715	0.158
1.973	4.451	1.974	3.485	1.982	32.453	1.9874	-0.075		1.973	935.394	1.974	10.053	1.982	-21.814	1.9874	551.553			1.75709	0.209
2.018	4.571	2.019	3.654	2.027	30.031	2.03256	-0.061		2.018	935.584	2.019	10.06	2.027	-21.68	2.03256	551.541			1.79702	0.189
2.063	4.682	2.064	3.777	2.072	26.775	2.07773	-0.054		2.063	935.754	2.064	10.008	2.072	-21.679	2.07773	551.527			1.83696	0.184
2.108	4.755	2.109	3.708	2.117	23.341	2.1229	-0.039		2.108	935.837	2.109	10.003	2.117	-21.749	2.1229	551.523			1.87689	0.206
2.153	4.711	2.154	3.766	2.162	20.274	2.16807	-0.034		2.153	935.882	2.154	10.144	2.162	-21.724	2.16807	551.541			1.91682	0.227
2.198	4.764	2.199	3.981	2.207	18.506	2.21324	-0.03		2.198	936.113	2.199	10.223	2.207	-21.745	2.21324	551.538			1.95676	0.235
2.243	4.904	2.244	3.906	2.252	17.675	2.25841	-0.025		2.243	936.225	2.244	10.326	2.252	-21.7	2.25841	551.532			1.99669	0.268
2.287	4.96	2.289	3.969	2.298	17.005	2.30357	-0.025		2.287	936.35	2.289	10.455	2.298	-21.66	2.30357	551.524			2.03663	0.219
2.332	4.997	2.333	4.03	2.343	16.331	2.34874	-0.029		2.332	936.431	2.333	10.482	2.343	-21.663	2.34874	551.499			2.07656	0.237
2.377	5.145	2.378	4.019	2.388	15.931	2.39391	-0.033		2.377	936.524	2.378	10.592	2.388	-21.672	2.39391	551.488			2.11649	0.227
2.422	5.214	2.423	4.116	2.433	15.475	2.43908	-0.029		2.422	936.72	2.423	10.73	2.433	-21.644	2.43908	551.502			2.15643	0.268
2.467	5.256	2.468	4.185	2.478	15.094	2.48425	-0.022		2.467	936.761	2.468	10.785	2.478	-21.646	2.48425	551.5			2.19636	0.301
2.512	5.41	2.513	4.392	2.523	14.612	2.52941	-0.019		2.512	936.842	2.513	10.904	2.523	-21.643	2.52941	551.52			2.23629	0.287
2.557	5.537	2.558	4.47	2.568	14.155	2.57458	-0.029		2.557	936.967	2.558	10.988	2.568	-21.649	2.57458	551.532			2.27623	0.323
2.601	5.706	2.603	4.441	2.613	13.605	2.61975	-0.052		2.601	937.118	2.603	10.944	2.613	-21.608	2.61975	551.525			2.31616	0.291
2.646	5.7	2.647	4.526	2.658	12.921	2.66492	-0.04		2.646	937.213	2.647	11.018	2.658	-21.626	2.66492	551.507			2.3561	0.288
2.691	5.731	2.692	4.611	2.703	12.202	2.71009	-0.029		2.691	937.274	2.692	11.07	2.703	-21.62	2.71009	551.497			2.39603	0.273
2.736	5.736	2.737	4.597	2.748	11.353	2.75525	-0.033		2.736	937.397	2.737	11.181	2.748	-21.655	2.75525	551.509			2.43596	0.284
2.781	5.836	2.782	4.695	2.793	10.442	2.80042	-0.027		2.781	937.47	2.782	11.401	2.793	-21.669	2.80042	551.513			2.4759	0.285
2.826	5.879	2.827	4.75	2.838	9.546	2.84559	-0.033		2.826	937.553	2.827	11.36	2.838	-21.645	2.84559	551.5			2.51583	0.28
2.87	6.069	2.872	4.695	2.883	8.923	2.89076	-0.035		2.87	937.703	2.872	11.337	2.883	-21.574	2.89076	551.505			2.55576	0.303
2.915	6.001	2.917	4.805	2.928	8.104	2.93593	-0.048		2.915	937.907	2.917	11.444	2.928	-21.601	2.93593	551.507			2.5957	0.299
2.96	6.094	2.962	4.88	2.973	7.126	2.98109	-0.028		2.96	937.946	2.962	11.46	2.973	-21.656	2.98109	551.511			2.63563	0.294
3.005	6.16	3.006	4.944	3.018	5.841	3.02626	-0.013		3.005	938.192	3.006	11.704	3.018	-21.582	3.02626	551.504			2.67557	0.298
3.05	6.261	3.051	5.076	3.063	4.133	3.07143	-0.025		3.05	938.105	3.051	11.853	3.063	-21.567	3.07143	551.498			2.7155	0.295
3.095	6.308	3.096	5.077	3.108	1.713	3.1166	-0.015		3.095	938.105	3.096	11.824	3.108	-21.587	3.1166	551.507			2.75543	0.298
3.14	6.302	3.141	5.077	3.153	-0.657	3.16177	-0.017		3.14	938.351	3.141	11.937	3.153	-21.56	3.16177	551.518			2.79537	0.311
3.184	6.385	3.186	5.12	3.198	-2.219	3.20694	-0.02		3.184	938.482	3.186	11.973	3.198	-21.534	3.20694	551.507			2.8353	0.303
3.229	6.507	3.231	5.226	3.244	-2.34	3.2521	-0.014		3.229	938.511	3.231	12.058	3.244	-21.568	3.2521	551.496			2.87524	0.303
3.274	6.518	3.276	5.146	3.289	-1.331	3.29727	-0.022		3.274	938.707	3.276	12.122	3.289	-21.487	3.29727	551.495			2.91517	0.334
3.319	6.629	3.321	5.167	3.334	0.134	3.34244	-0.028		3.319	938.728	3.321	12.225	3.334	-21.475	3.34244	551.508			2.9551	0.35
3.364	6.709	3.365	5.337	3.379	1.083	3.38761	-0.027		3.364	938.796	3.365	12.344	3.379	-21.551	3.38761	551.501			2.99504	0.359
3.409	6.801	3.41	5.369	3.424	1.374	3.43278	-0.023		3.409	938.991	3.41	12.476	3.424	-21.574	3.43278	551.499			3.03497	0.355
3.454	6.824	3.455	5.411	3.469	1.022	3.47794	-0.002		3.454	939.008	3.455	12.389	3.469	-21.544	3.47794	551.491			3.0749	0.362
3.498	6.956	3.5	5.377	3.514	0.128	3.52311	-0.002		3.498	939.062	3.5	12.51	3.514	-21.523	3.52311	551.486			3.11484	0.385
3.543	6.89	3.545	5.27	3.559	-0.842	3.56828	-0.015		3.543	939.202	3.545	12.695	3.559	-21.525	3.56828	551.494			3.15477	0.383
3.588	7.045	3.59	5.423	3.604	-1.498	3.61345	0.003		3.588	939.292	3.59	12.693	3.604	-21.534	3.61345	551.494			3.19471	0.343
3.633	7.125	3.635	5.592	3.649	-1.809	3.65862	0.009		3.633	939.456	3.635	12.87	3.649	-21.427	3.65862	551.498			3.23464	0.361
3.678	7.186	3.68	5.539	3.694	-1.766	3.70378	-0.015		3.678	939.625	3.68	12.869	3.694	-21.435	3.70378	551.494			3.27457	0.351
3.723	7.144	3.724	5.589	3.739	-1.403	3.74895	-0.007		3.723	939.679	3.724	12.842	3.739	-21.423	3.74895	551.504			3.31451	0.361
3.768	7.284	3.769	5.776	3.784	-0.965	3.79412	0.016		3.768	939.713	3.769	12.924	3.784	-21.433	3.79412	551.525			3.35444	0.362
3.812	7.355	3.814	5.731	3.829	-0.589	3.83929	0.009		3.812	939.724	3.814	12.947	3.829	-21.429	3.83929	551.517			3.39438	0.386
3.857	7.529	3.859	5.706	3.874	-0.31	3.88446	0.009		3.857	939.817	3.859	13.038	3.874	-21.385	3.88446	551.509			3.43431	0.372
3.902	7.537	3.904	5.807	3.919	-0.262	3.92962	0.019		3.902	940.013	3.904	13.242	3.919	-21.424	3.92962	551.492			3.47424	0.372
3.947	7.336	3.949	5.889	3.964	-0.241	3.97479	0.019		3.947	940.23	3.949	13.34	3.964	-21.474	3.97479	551.509			3.51418	0.364
3.992	7.45	3.994	5.872	4.009	-0.278	4.01996	0.02		3.992	940.318	3.994	13.399	4.009	-21.377	4.01996	551.532			3.55411	0.36
4.037	7.607	4.039	5.948	4.054	-0.318	4.06513	0.032		4.037	940.335	4.039	13.399	4.054	-21.304	4.06513	551.523			3.59404	0.349
4.081	7.596	4.083	5.997	4.099	-0.349	4.1103	0.055		4.081	940.561	4.083	13.41	4.099	-21.362	4.1103	551.521			3.63398	0.346
4.126	7.722	4.128	6.06	4.145	-0.34	4.15547	0.075		4.126	940.58	4.128	13.515	4.145	-21.384	4.15547	551.524			3.67391	0.323
4.171	7.72	4.173	6.092	4.19	-0.271	4.20063	0.086		4.171	940.565	4.173	13.729	4.19	-21.322	4.20063	551.524			3.71385	0.324
4.216	7.734	4.218	6.054	4.235	-0.238	4.2458	0.122		4.216	940.64	4.218	13.695	4.235	-21.307	4.2458	551.53			3.75378	0.36
4.261	7.748	4.263	6.141	4.28	-0.246	4.29097	0.142		4.261	940.798	4.263	13.761	4.28	-21.313	4.29097	551.538			3.79371	0.388
4.306	7.762	4.308	6.247	4.325	-0.248	4.33614	0.149		4.306	940.664	4.308	13.863	4.325	-21.323	4.33614	551.547			3.83365	0.392
4.351	7.946	4.353	6.305	4.37	-0.231	4.38131	0.155		4.351	940.682	4.353	13.883	4.37	-21.326	4.38131	551.547			3.87358	0.384
4.395	7.883	4.398	6.271	4.415	-0.21	4.42647	0.187		4.395	940.497	4.398	14.06	4.415	-21.329	4.42647	551.559			3.91351	0.387
4.44	7.833	4.442	6.328	4.46	-0.205	4.47164	0.216		4.44	940.419	4.442	14.07	4.46	-21.338	4.47164	551.563			3.95345	0.422
4.485	7.999	4.487	6.233	4.505	-0.191	4.51681	0.227		4.485	940.241	4.487	14.125	4.505	-21.329	4.51681	551.535			3.99338	0.411
4.53	7.893	4.532	6.406	4.55	-0.184	4.56198	0.24		4.53	940.197	4.532	14.247	4.55	3.068	4.56198	551.524			4.03332	0.449
4.575	7.959	4.577	6.5	4.595	-0.221	4.60715	0.251		4.575	528.586	4.577	14.311	4.595	10.879	4.60715	216.134			4.07325	0.447
4.62	7.901	4.622	6.431	4.64	-0.286	4.65231	0.263		4.62	2.261	4.622	14.343	4.64	4.834	4.65231	-0.009			4.11318	0.457
4.665	8.073	4.667	6.488	4.685	-0.325	4.69748	0.288		4.665	0.647	4.667	14.392	4.685	0.941	4.69748	-0.011			4.15312	0.492
4.709	8.152	4.712	6.496	4.73	-0.375	4.74265	0.318		4.709	-0.221	4.712	0.046	4.73	0.866	4.74265	-0.003			4.19305	0.488
4.754	8.082	4.756	6.579	4.775	-0.376	4.78782	0.329		4.754	-0.288	4.756	3.542	4.775	0.862	4.78782	0.016			4.23299	0.524
4.799	8.041	4.801	6.586	4.82	-0.367	4.83299	0.338		4.799	-0.257	4.801	2.424	4.82	0.047	4.83299	-0.002			4.27292	0.518
4.844	8.099	4.846	6.676	4.865	-0.445	4.87815	0.331		4.844	-0.144	4.846	1.223	4.865	-0.025	4.87815	0			4.31285	0.537
4.889	8.115	4.891	6.766	4.91	-0.484	4.92332	0.359		4.889	-0.035	4.891	1.221	4.91	0.607	4.92332	0.016			4.35279	0.537
4.934	8.166	4.936	6.725	4.955	-0.476	4.96849	0.356		4.934	0.049	4.936	1.432	4.955	1.65	4.96849	-0.001			4.39272	0.55
4.979	8.195	4.981	6.795	5	-0.443	5.01366	0.343		4.979	0.087	4.981	1.4	5	2.707	5.01366	-0.004			4.43265	0.557
5.023	8.176	5.026	6.844	5.046	-0.506	5.05883	0.358		5.023	0.08	5.026	1.324	5.046	3.667	5.05883	-0.013			4.47259	0.536
5.068	8.221	5.071	6.833	5.091	-0.494	5.104	0.344		5.068	0.185	5.071	1.339	5.091	4.411	5.104	-0.002			4.51252	0.563
5.113	8.25	5.115	6.852	5.136	-0.484	5.14916	0.323		5.113	0.322	5.115	1.387	5.136	4.903	5.14916	-0.01			4.55246	0.584
5.158	8.257	5.16	7.025	5.181	-0.529	5.19433	0.286		5.158	0.202	5.16	1.475	5.181	5.368	5.19433	-0.021			4.59239	0.606
5.203	8.202	5.205	6.873	5.226	-0.561	5.2395	0.214		5.203	0.219	5.205	1.603	5.226	5.71	5.2395	-0.009			4.63232	0.62
5.248	8.323	5.25	7.009	5.271	-0.56	5.28467	0.067		5.248	0.328	5.25	1.629	5.271	6.031	5.28467	-0.016			4.67226	0.654
5.292	8.352	5.295	6.99	5.316	-0.532	5.32984	-0.196		5.292	0.47	5.295	1.653	5.316	6.601	5.32984	-0.006			4.71219	0.646
5.337	8.335	5.34	7.123	5.361	-0.518	5.375	-1.861		5.337	0.348	5.34	1.711	5.361	7.336	5.375	-0.011			4.75213	0.642
5.382	8.605	5.385	7.061	5.406	-0.463	5.42017	1.04		5.382	0.667	5.385	1.7	5.406	8.54	5.42017	-0.019			4.79206	0.641
5.427	8.47	5.43	7.031	5.451	-0.419	5.46534	11.612		5.427	0.804	5.43	1.837	5.451	10.498	5.46534	-0.033			4.83199	0.642
5.472	8.388	5.474	7.099	5.496	-0.343	5.51051	20.286		5.472	1.006	5.474	1.924	5.496	13.327	5.51051	-0.04			4.87193	0.617
5.517	8.482	5.519	7.117	5.541	-0.28	5.55568	25.108		5.517	1.084	5.519	1.93	5.541	17.37	5.55568	-0.027			4.91186	0.611
5.562	8.435	5.564	7.125	5.586	-0.213	5.60084	26.957		5.562	1.431	5.564	2.006	5.586	21.893	5.60084	-0.028			4.95179	0.628
5.606	8.511	5.609	7.177	5.631	-0.143	5.64601	26.744		5.606	1.849	5.609	2.082	5.631	25.339	5.64601	-0.032			4.99173	0.629
5.651	8.583	5.654	7.309	5.676	-0.102	5.69118	25.316		5.651	2.106	5.654	2.192	5.676	26.978	5.69118	-0.038			5.03166	0.594
5.696	8.54	5.699	7.367	5.721	-0.039	5.73635	23.225		5.696	2.244	5.699	2.272	5.721	27.25	5.73635	-0.012			5.0716	0.569
5.741	8.53	5.744	7.368	5.766	0.023	5.78152	20.873		5.741	2.723	5.744	2.264	5.766	27.342	5.78152	-0.02			5.11153	0.587
5.786	8.556	5.789	7.323	5.811	0.042	5.82669	18.975		5.786	2.84	5.789	2.447	5.811	27.902	5.82669	-0.024			5.15146	0.603
5.831	8.63	5.833	7.307	5.856	0.074	5.87185	18.855		5.831	3.01	5.833	2.483	5.856	29.336	5.87185	-0.005			5.1914	0.57
5.876	8.664	5.878	7.433	5.901	0.12	5.91702	22.865		5.876	3.178	5.878	2.505	5.901	31.428	5.91702	-0.02			5.23133	0.549
5.92	8.681	5.923	7.405	5.947	0.108	5.96219	30		5.92	3.534	5.923	2.513	5.947	34.218	5.96219	-0.023			5.27126	0.544
5.965	8.663	5.968	7.548	5.992	0.148	6.00736	33.543		5.965	3.592	5.968	2.602	5.992	37.281	6.00736	-0.043			5.3112	0.56
6.01	8.532	6.013	7.521	6.037	0.157	6.05253	35.684		6.01	3.667	6.013	2.603	6.037	40.322	6.05253	-0.061			5.35113	0.546
6.055	8.566	6.058	7.505	6.082	0.117	6.09769	37.513		6.055	3.883	6.058	2.73	6.082	42.56	6.09769	-0.062			5.39107	0.547
6.1	8.67	6.103	7.705	6.127	0.125	6.14286	38.186		6.1	3.845	6.103	2.827	6.127	43.659	6.14286	-0.059			5.431	0.515
6.145	8.734	6.148	7.752	6.172	0.178	6.18803	38.182		6.145	4.01	6.148	2.864	6.172	43.43	6.18803	-0.05			5.47093	0.526
6.189	8.777	6.192	7.736	6.217	0.137	6.2332	38.011		6.189	4.187	6.192	2.973	6.217	42.347	6.2332	-0.058			5.51087	0.518
6.234	8.668	6.237	7.678	6.262	0.087	6.27837	37.775		6.234	4.368	6.237	3.04	6.262	41.264	6.27837	-0.055			5.5508	0.547
6.279	8.711	6.282	7.752	6.307	0.099	6.32353	37.495		6.279	4.344	6.282	3.148	6.307	40.358	6.32353	-0.053			5.59074	0.556
6.324	8.74	6.327	7.676	6.352	0.047	6.3687	37.226		6.324	4.414	6.327	3.128	6.352	39.233	6.3687	-0.042			5.63067	0.518
6.369	8.752	6.372	7.775	6.397	-0.073	6.41387	36.961		6.369	4.372	6.372	3.202	6.397	37.534	6.41387	-0.038			5.6706	0.546
6.414	8.799	6.417	7.858	6.442	-0.17	6.45904	36.588		6.414	4.395	6.417	3.243	6.442	35.951	6.45904	-0.046			5.71054	0.509
6.459	8.75	6.462	7.816	6.487	-0.339	6.50421	36.133		6.459	4.374	6.462	3.223	6.487	34.27	6.50421	-0.026			5.75047	0.489
6.503	8.923	6.507	7.92	6.532	-0.558	6.54937	35.905		6.503	4.397	6.507	3.18	6.532	32.453	6.54937	-0.043			5.7904	0.5
6.548	8.936	6.551	7.941	6.577	-0.695	6.59454	36.102		6.548	4.417	6.551	3.476	6.577	30.031	6.59454	-0.061			5.83034	0.502
6.593	8.884	6.596	8.004	6.622	-0.795	6.63971	37.059		6.593	4.451	6.596	3.434	6.622	26.775	6.63971	-0.075			5.87027	0.508
6.638	8.987	6.641	8.005	6.667	-0.949	6.68488	39.11		6.638	4.571	6.641	3.495	6.667	23.341	6.68488	-0.061			5.91021	0.509
6.683	9.147	6.686	7.892	6.712	-1.061	6.73005	41.943		6.683	4.682	6.686	3.485	6.712	20.274	6.73005	-0.054			5.95014	0.524
6.728	9.078	6.731	7.931	6.757	-1.185	6.77522	45.006		6.728	4.755	6.731	3.654	6.757	18.506	6.77522	-0.039			5.99007	0.544
6.773	9.024	6.776	8.006	6.802	-1.075	6.82038	48.45		6.773	4.711	6.776	3.777	6.802	17.675	6.82038	-0.034			6.03001	0.527
6.817	8.984	6.821	8.215	6.847	-0.96	6.86555	52.34		6.817	4.764	6.821	3.708	6.847	17.005	6.86555	-0.03			6.06994	0.522
6.862	9.059	6.866	8.251	6.893	-0.76	6.91072	55.476		6.862	4.904	6.866	3.766	6.893	16.331	6.91072	-0.025			6.10988	0.565
6.907	9.175	6.91	8.264	6.938	-0.552	6.95589	57.45		6.907	4.96	6.91	3.981	6.938	15.931	6.95589	-0.025			6.14981	0.565
6.952	9.178	6.955	8.201	6.983	-0.353	7.00106	58.765		6.952	4.997	6.955	3.906	6.983	15.475	7.00106	-0.029			6.18974	0.55
6.997	9.311	7	8.29	7.028	-0.15	7.04622	59.936		6.997	5.145	7	3.969	7.028	15.094	7.04622	-0.033			6.22968	0.563
7.042	9.432	7.045	8.574	7.073	0.133	7.09139	61.115		7.042	5.214	7.045	4.03	7.073	14.612	7.09139	-0.029			6.26961	0.552
7.087	9.714	7.09	9.167	7.118	0.342	7.13656	62.473		7.087	5.256	7.09	4.019	7.118	14.155	7.13656	-0.022			6.30954	0.515
7.131	10.182	7.135	10.616	7.163	0.715	7.18173	64.054		7.131	5.41	7.135	4.116	7.163	13.605	7.18173	-0.019			6.34948	0.533
7.176	11.227	7.18	13.368	7.208	1.383	7.2269	65.937		7.176	5.537	7.18	4.185	7.208	12.921	7.2269	-0.029			6.38941	0.537
7.221	12.885	7.224	18.139	7.253	2.7	7.27206	68.746		7.221	5.706	7.224	4.392	7.253	12.202	7.27206	-0.052			6.42935	0.542
7.266	15.338	7.269	25.272	7.298	5.033	7.31723	73.505		7.266	5.7	7.269	4.47	7.298	11.353	7.31723	-0.04			6.46928	0.548
7.311	18.691	7.314	34.589	7.343	8.495	7.3624	81.42		7.311	5.731	7.314	4.441	7.343	10.442	7.3624	-0.029			6.50921	0.578
7.356	22.902	7.359	45.538	7.388	13.014	7.40757	92.612		7.356	5.736	7.359	4.526	7.388	9.546	7.40757	-0.033			6.54915	0.617
7.4	27.693	7.404	56.65	7.433	19.119	7.45274	105.825		7.4	5.836	7.404	4.611	7.433	8.923	7.45274	-0.027			6.58908	0.654
7.445	32.597	7.449	67.015	7.478	25.92	7.4979	119.251		7.445	5.879	7.449	4.597	7.478	8.104	7.4979	-0.033			6.62901	0.685
7.49	37.28	7.494	76.175	7.523	33.468	7.54307	130.324		7.49	6.069	7.494	4.695	7.523	7.126	7.54307	-0.035			6.66895	0.711
7.535	41.246	7.539	83.903	7.568	41.495	7.58824	137.384		7.535	6.001	7.539	4.75	7.568	5.841	7.58824	-0.048			6.70888	0.743
7.58	44.256	7.583	89.494	7.613	49.425	7.63341	141.594		7.58	6.094	7.583	4.695	7.613	4.133	7.63341	-0.028			6.74882	0.772
7.625	46.079	7.628	93.737	7.658	57.086	7.67858	143.412		7.625	6.16	7.628	4.805	7.658	1.713	7.67858	-0.013			6.78875	0.8
7.67	46.937	7.673	96.633	7.703	64.184	7.72375	140.947		7.67	6.261	7.673	4.88	7.703	-0.657	7.72375	-0.025			6.82868	0.859
7.714	46.89	7.718	98.189	7.748	70.845	7.76891	136.25		7.714	6.308	7.718	4.944	7.748	-2.219	7.76891	-0.015			6.86862	0.913
7.759	46.345	7.763	98.901	7.794	76.741	7.81408	133.472		7.759	6.302	7.763	5.076	7.794	-2.34	7.81408	-0.017			6.90855	0.985
7.804	45.525	7.808	98.828	7.839	81.622	7.85925	132.331		7.804	6.385	7.808	5.077	7.839	-1.331	7.85925	-0.02			6.94849	1.113
7.849	44.502	7.853	98.19	7.884	85.597	7.90442	131.054		7.849	6.507	7.853	5.077	7.884	0.134	7.90442	-0.014			6.98842	1.285
7.894	43.514	7.898	96.803	7.929	88.465	7.94959	128.155		7.894	6.518	7.898	5.12	7.929	1.083	7.94959	-0.022			7.02835	1.529
7.939	42.683	7.942	94.771	7.974	89.774	7.99475	123.095		7.939	6.629	7.942	5.226	7.974	1.374	7.99475	-0.028			7.06829	1.847
7.984	42.28	7.987	91.728	8.019	89.505	8.03992	116.3		7.984	6.709	7.987	5.146	8.019	1.022	8.03992	-0.027			7.10822	2.299
8.028	42.191	8.032	87.523	8.064	87.494	8.08509	108.412		8.028	6.801	8.032	5.167	8.064	0.128	8.08509	-0.023			7.14815	2.776
8.073	42.163	8.077	82.499	8.109	83.785	8.13026	99.897		8.073	6.824	8.077	5.337	8.109	-0.842	8.13026	-0.002			7.18809	3.385
8.118	42.175	8.122	76.495	8.154	78.983	8.17543	91.355		8.118	6.956	8.122	5.369	8.154	-1.498	8.17543	-0.002			7.22802	3.995
8.163	41.706	8.167	69.518	8.199	73.41	8.22059	82.905		8.163	6.89	8.167	5.411	8.199	-1.809	8.22059	-0.015			7.26796	4.7
8.208	40.904	8.212	62.327	8.244	67.425	8.26576	74.72		8.208	7.045	8.212	5.377	8.244	-1.766	8.26576	0.003			7.30789	5.427
8.253	39.797	8.257	55.493	8.289	61.085	8.31093	66.732		8.253	7.125	8.257	5.27	8.289	-1.403	8.31093	0.009			7.34782	6.241
8.298	37.885	8.301	49.271	8.334	55.17	8.3561	58.774		8.298	7.186	8.301	5.423	8.334	-0.965	8.3561	-0.015			7.38776	7.012
8.342	35.72	8.346	43.477	8.379	49.462	8.40127	51.027		8.342	7.144	8.346	5.592	8.379	-0.589	8.40127	-0.007			7.42769	7.825
8.387	33.319	8.391	38.373	8.424	44.063	8.44643	43.807		8.387	7.284	8.391	5.539	8.424	-0.31	8.44643	0.016			7.46763	8.65
8.432	30.863	8.436	33.716	8.469	38.898	8.4916	37.286		8.432	7.355	8.436	5.589	8.469	-0.262	8.4916	0.009			7.50756	9.472
8.477	28.176	8.481	29.828	8.514	34.21	8.53677	31.488		8.477	7.529	8.481	5.776	8.514	-0.241	8.53677	0.009			7.54749	10.349
8.522	25.762	8.526	26.68	8.559	29.809	8.58194	26.318		8.522	7.537	8.526	5.731	8.559	-0.278	8.58194	0.019			7.58743	11.191
8.567	23.553	8.571	23.98	8.604	25.634	8.62711	21.955		8.567	7.336	8.571	5.706	8.604	-0.318	8.62711	0.019			7.62736	12.098
8.611	21.827	8.616	22.116	8.649	22.401	8.67228	18.416		8.611	7.45	8.616	5.807	8.649	-0.349	8.67228	0.02			7.66729	13.094
8.656	20.339	8.66	20.712	8.695	19.756	8.71744	15.587		8.656	7.607	8.66	5.889	8.695	-0.34	8.71744	0.032			7.70723	14.185
8.701	19.246	8.705	19.744	8.74	17.789	8.76261	13.362		8.701	7.596	8.705	5.872	8.74	-0.271	8.76261	0.055			7.74716	15.501
8.746	18.56	8.75	18.985	8.785	16.246	8.80778	11.598		8.746	7.722	8.75	5.948	8.785	-0.238	8.80778	0.075			7.7871	17.002
8.791	18.052	8.795	18.475	8.83	15.041	8.85295	10.305		8.791	7.72	8.795	5.997	8.83	-0.246	8.85295	0.086			7.82703	18.795
8.836	17.642	8.84	17.939	8.875	14.103	8.89812	9.355		8.836	7.734	8.84	6.06	8.875	-0.248	8.89812	0.122			7.86696	20.916
8.881	17.3	8.885	17.533	8.92	13.317	8.94328	8.645		8.881	7.748	8.885	6.092	8.92	-0.231	8.94328	0.142			7.9069	23.56
8.925	16.983	8.93	17.03	8.965	12.61	8.98845	8.105		8.925	7.762	8.93	6.054	8.965	-0.21	8.98845	0.149			7.94683	26.779
8.97	16.761	8.975	16.81	9.01	12.021	9.03362	7.697		8.97	7.946	8.975	6.141	9.01	-0.205	9.03362	0.155			7.98676	30.601
9.015	16.504	9.019	16.478	9.055	11.452	9.07879	7.353		9.015	7.883	9.019	6.247	9.055	-0.191	9.07879	0.187			8.0267	34.968
9.06	16.411	9.064	16.143	9.1	10.941	9.12396	7.06		9.06	7.833	9.064	6.305	9.1	-0.184	9.12396	0.216			8.06663	39.717
9.105	16.15	9.109	15.986	9.145	10.477	9.16912	6.802		9.105	7.999	9.109	6.271	9.145	-0.221	9.16912	0.227			8.10657	44.661
9.15	16.212	9.154	15.657	9.19	10.019	9.21429	6.55		9.15	7.893	9.154	6.328	9.19	-0.286	9.21429	0.24			8.1465	49.664
9.195	16.201	9.199	15.475	9.235	9.676	9.25946	6.297		9.195	7.959	9.199	6.233	9.235	-0.325	9.25946	0.251			8.18643	54.595
9.239	16.036	9.244	15.297	9.28	9.346	9.30463	6.054		9.239	7.901	9.244	6.406	9.28	-0.375	9.30463	0.263			8.22637	59.285
9.284	15.856	9.289	15.22	9.325	8.999	9.3498	5.842		9.284	8.073	9.289	6.5	9.325	-0.376	9.3498	0.288			8.2663	63.752
9.329	15.736	9.333	15.081	9.37	8.718	9.39497	5.639		9.329	8.152	9.333	6.431	9.37	-0.367	9.39497	0.318			8.30624	67.864
9.374	15.84	9.378	14.845	9.415	8.565	9.44013	5.42		9.374	8.082	9.378	6.488	9.415	-0.445	9.44013	0.329			8.34617	71.601
9.419	15.649	9.423	14.663	9.46	8.316	9.4853	5.192		9.419	8.041	9.423	6.496	9.46	-0.484	9.4853	0.338			8.3861	74.869
9.464	15.671	9.468	14.617	9.505	8.094	9.53047	4.986		9.464	8.099	9.468	6.579	9.505	-0.476	9.53047	0.331			8.42604	77.569
9.508	15.696	9.513	14.383	9.55	8.005	9.57564	4.77		9.508	8.115	9.513	6.586	9.55	-0.443	9.57564	0.359			8.46597	79.575
9.553	15.533	9.558	14.284	9.595	7.778	9.62081	4.553		9.553	8.166	9.558	6.676	9.595	-0.506	9.62081	0.356			8.5059	80.76
9.598	15.36	9.603	14.213	9.641	7.626	9.66597	4.331		9.598	8.195	9.603	6.766	9.641	-0.494	9.66597	0.343			8.54584	81.276
9.643	15.218	9.648	14.053	9.686	7.489	9.71114	4.099		9.643	8.176	9.648	6.725	9.686	-0.484	9.71114	0.358			8.58577	81.222
9.688	15.191	9.692	13.931	9.731	7.316	9.75631	3.901		9.688	8.221	9.692	6.795	9.731	-0.529	9.75631	0.344			8.62571	80.779
9.733	15.181	9.737	13.808	9.776	7.126	9.80148	3.679		9.733	8.25	9.737	6.844	9.776	-0.561	9.80148	0.323			8.66564	80.093
9.778	15.078	9.782	13.803	9.821	7.007	9.84665	3.449		9.778	8.257	9.782	6.833	9.821	-0.56	9.84665	0.286			8.70557	79.364
9.822	15.054	9.827	13.843	9.866	6.896	9.89181	3.264		9.822	8.202	9.827	6.852	9.866	-0.532	9.89181	0.214			8.74551	78.707
9.867	15.081	9.872	13.74	9.911	6.835	9.93698	3.115		9.867	8.323	9.872	7.025	9.911	-0.518	9.93698	0.067			8.78544	78.25
9.912	15.056	9.917	13.728	9.956	6.752	9.98215	3.013		9.912	8.352	9.917	6.873	9.956	-0.463	9.98215	-0.196			8.82538	78.175
9.957	15.143	9.962	13.762	10.001	6.658	10.0273	2.982		9.957	8.335	9.962	7.009	10.001	-0.419	10.0273	-1.861			8.86531	78.689
10.002	15.005	10.007	13.768	10.046	6.555	10.0725	3.056		10.002	8.605	10.007	6.99	10.046	-0.343	10.0725	1.04			8.90524	80.116
10.047	15.111	10.051	13.656	10.091	6.556	10.1177	3.241		10.047	8.47	10.051	7.123	10.091	-0.28	10.1177	11.612			8.94518	82.797
10.092	15.19	10.096	13.761	10.136	6.608	10.1628	3.613		10.092	8.388	10.096	7.061	10.136	-0.213	10.1628	20.286			8.98511	87.197
10.136	15.119	10.141	13.963	10.181	6.656	10.208	4.271		10.136	8.482	10.141	7.031	10.181	-0.143	10.208	25.108			9.02504	93.748
10.181	15.466	10.186	14.29	10.226	6.887	10.2532	5.157		10.181	8.435	10.186	7.099	10.226	-0.102	10.2532	26.957			9.06498	102.713
10.226	15.674	10.231	14.718	10.271	7.311	10.2983	6.35		10.226	8.511	10.231	7.117	10.271	-0.039	10.2983	26.744			9.10491	114.301
10.271	15.915	10.276	15.432	10.316	7.98	10.3435	7.895		10.271	8.583	10.276	7.125	10.316	0.023	10.3435	25.316			9.14485	128.553
10.316	16.62	10.321	16.615	10.361	8.878	10.3887	9.777		10.316	8.54	10.321	7.177	10.361	0.042	10.3887	23.225			9.18478	145.337
10.361	17.397	10.366	18.153	10.406	10.247	10.4338	11.94		10.361	8.53	10.366	7.309	10.406	0.074	10.4338	20.873			9.22471	164.125
10.406	18.188	10.41	20.369	10.451	12.023	10.479	14.328		10.406	8.556	10.41	7.367	10.451	0.12	10.479	18.975			9.26465	184.353
10.45	19.278	10.455	23.297	10.496	14.528	10.5242	16.82		10.45	8.63	10.455	7.368	10.496	0.108	10.5242	18.855			9.30458	205.312
10.495	20.79	10.5	26.844	10.542	17.427	10.5693	19.332		10.495	8.664	10.5	7.323	10.542	0.148	10.5693	22.865			9.34451	226.066
10.54	22.151	10.545	31.031	10.587	20.915	10.6145	21.679		10.54	8.681	10.545	7.307	10.587	0.157	10.6145	30			9.38445	245.871
10.585	23.72	10.59	35.806	10.632	24.859	10.6597	23.833		10.585	8.663	10.59	7.433	10.632	0.117	10.6597	33.543			9.42438	263.715
10.63	25.207	10.635	40.439	10.677	28.992	10.7048	25.728		10.63	8.532	10.635	7.405	10.677	0.125	10.7048	35.684			9.46432	278.908
10.675	26.558	10.68	44.729	10.722	33.094	10.75	27.225		10.675	8.566	10.68	7.548	10.722	0.178	10.75	37.513			9.50425	290.493
10.719	27.612	10.725	48.659	10.767	36.808	10.7952	28.254		10.719	8.67	10.725	7.521	10.767	0.137	10.7952	38.186			9.54418	298.018
10.764	28.421	10.769	51.731	10.812	40.155	10.8403	28.788		10.764	8.734	10.769	7.505	10.812	0.087	10.8403	38.182			9.58412	300.976
10.809	28.96	10.814	53.466	10.857	42.534	10.8855	28.853		10.809	8.777	10.814	7.705	10.857	0.099	10.8855	38.011			9.62405	299.088
10.854	28.97	10.859	53.934	10.902	44.031	10.9307	28.473		10.854	8.668	10.859	7.752	10.902	0.047	10.9307	37.775			9.66399	292.411
10.899	28.616	10.904	53.134	10.947	44.474	10.9758	27.72		10.899	8.711	10.904	7.736	10.947	-0.073	10.9758	37.495			9.70392	281.353
10.944	27.693	10.949	51.148	10.992	43.87	11.021	26.646		10.944	8.74	10.949	7.678	10.992	-0.17	11.021	37.226			9.74385	266.516
10.989	26.931	10.994	48.308	11.037	42.289	11.0662	25.309		10.989	8.752	10.994	7.752	11.037	-0.339	11.0662	36.961			9.78379	248.716
11.033	25.846	11.039	44.813	11.082	39.892	11.1114	23.788		11.033	8.799	11.039	7.676	11.082	-0.558	11.1114	36.588			9.82372	228.89
11.078	24.478	11.084	40.899	11.127	36.985	11.1565	22.127		11.078	8.75	11.084	7.775	11.127	-0.695	11.1565	36.133			9.86365	208.081
11.123	23.238	11.128	36.797	11.172	33.575	11.2017	20.412		11.123	8.923	11.128	7.858	11.172	-0.795	11.2017	35.905			9.90359	187.128
11.168	21.891	11.173	33.026	11.217	30.229	11.2469	18.672		11.168	8.936	11.173	7.816	11.217	-0.949	11.2469	36.102			9.94352	167.034
11.213	20.712	11.218	29.459	11.262	26.926	11.292	16.988		11.213	8.884	11.218	7.92	11.262	-1.061	11.292	37.059			9.98346	148.397
11.258	19.814	11.263	26.497	11.307	23.693	11.3372	15.372		11.258	8.987	11.263	7.941	11.307	-1.185	11.3372	39.11			10.0234	131.673
11.303	18.944	11.308	23.82	11.352	20.73	11.3824	13.761		11.303	9.147	11.308	8.004	11.352	-1.075	11.3824	41.943			10.0633	117.16
11.347	18.097	11.353	21.64	11.397	18.073	11.4275	12.211		11.347	9.078	11.353	8.005	11.397	-0.96	11.4275	45.006			10.1033	104.851
11.392	17.446	11.398	19.894	11.443	15.781	11.4727	10.765		11.392	9.024	11.398	7.892	11.443	-0.76	11.4727	48.45			10.1432	94.791
11.437	16.811	11.443	18.545	11.488	13.945	11.5179	9.382		11.437	8.984	11.443	7.931	11.488	-0.552	11.5179	52.34			10.1831	86.763
11.482	16.441	11.487	17.46	11.533	12.403	11.563	8.115		11.482	9.059	11.487	8.006	11.533	-0.353	11.563	55.476			10.2231	80.614
11.527	16.14	11.532	16.611	11.578	11.057	11.6082	6.952		11.527	9.175	11.532	8.215	11.578	-0.15	11.6082	57.45			10.263	76.056
11.572	15.679	11.577	15.877	11.623	9.947	11.6534	5.933		11.572	9.178	11.577	8.251	11.623	0.133	11.6534	58.765			10.3029	72.888
11.617	15.452	11.622	15.486	11.668	9.097	11.6985	5.025		11.617	9.311	11.622	8.264	11.668	0.342	11.6985	59.936			10.3429	70.846
11.661	15.416	11.667	14.997	11.713	8.365	11.7437	4.218		11.661	9.432	11.667	8.201	11.713	0.715	11.7437	61.115			10.3828	69.771
11.706	15.277	11.712	14.629	11.758	7.849	11.7889	3.537		11.706	9.714	11.712	8.29	11.758	1.383	11.7889	62.473			10.4227	69.472
11.751	15.262	11.757	14.363	11.803	7.354	11.834	3.003		11.751	10.182	11.757	8.574	11.803	2.7	11.834	64.054			10.4627	69.702
11.796	15.078	11.801	14.244	11.848	6.873	11.8792	2.591		11.796	11.227	11.801	9.167	11.848	5.033	11.8792	65.937			10.5026	70.373
11.841	15.1	11.846	14.017	11.893	6.63	11.9244	2.322		11.841	12.885	11.846	10.616	11.893	8.495	11.9244	68.746			10.5425	71.286
11.886	15.303	11.891	13.896	11.938	6.416	11.9695	2.13		11.886	15.338	11.891	13.368	11.938	13.014	11.9695	73.505			10.5825	72.323
11.93	15.504	11.936	13.93	11.983	6.232	12.0147	2.012		11.93	18.691	11.936	18.139	11.983	19.119	12.0147	81.42			10.6224	73.306
11.975	15.361	11.981	13.854	12.028	6.129	12.0599	1.966		11.975	22.902	11.981	25.272	12.028	25.92	12.0599	92.612			10.6623	74.076
12.02	15.473	12.026	13.913	12.073	6.105	12.1051	1.973		12.02	27.693	12.026	34.589	12.073	33.468	12.1051	105.825			10.7023	74.644
12.065	15.467	12.071	13.854	12.118	6.002	12.1502	2.027		12.065	32.597	12.071	45.538	12.118	41.495	12.1502	119.251			10.7422	74.839
12.11	15.466	12.116	13.909	12.163	5.948	12.1954	2.104		12.11	37.28	12.116	56.65	12.163	49.425	12.1954	130.324			10.7821	74.625
12.155	15.678	12.16	13.98	12.208	6.044	12.2406	2.231		12.155	41.246	12.16	67.015	12.208	57.086	12.2406	137.384			10.8221	73.897
12.2	15.997	12.205	14.028	12.253	6.174	12.2857	2.328		12.2	44.256	12.205	76.175	12.253	64.184	12.2857	141.594			10.862	72.753
12.244	16.001	12.25	14.103	12.298	6.107	12.3309	2.446		12.244	46.079	12.25	83.903	12.298	70.845	12.3309	143.412			10.9019	71.005
12.289	16.072	12.295	14.329	12.343	6.167	12.3761	2.573		12.289	46.937	12.295	89.494	12.343	76.741	12.3761	140.947			10.9419	68.797
12.334	16.365	12.34	14.363	12.389	6.323	12.4212	2.701		12.334	46.89	12.34	93.737	12.389	81.622	12.4212	136.25			10.9818	66.179
12.379	16.495	12.385	14.451	12.434	6.435	12.4664	2.824		12.379	46.345	12.385	96.633	12.434	85.597	12.4664	133.472			11.0217	63.175
12.424	16.445	12.43	14.55	12.479	6.614	12.5116	2.965		12.424	45.525	12.43	98.189	12.479	88.465	12.5116	132.331			11.0617	59.84
12.469	16.628	12.475	14.571	12.524	6.719	12.5567	3.11		12.469	44.502	12.475	98.901	12.524	89.774	12.5567	131.054			11.1016	56.357
12.514	16.934	12.519	14.682	12.569	6.843	12.6019	3.268		12.514	43.514	12.519	98.828	12.569	89.505	12.6019	128.155			11.1415	52.751
12.558	17.078	12.564	14.951	12.614	6.986	12.6471	3.445		12.558	42.683	12.564	98.19	12.614	87.494	12.6471	123.095			11.1815	49.188
12.603	17.169	12.609	14.877	12.659	7.111	12.6922	3.639		12.603	42.28	12.609	96.803	12.659	83.785	12.6922	116.3			11.2214	45.762
12.648	17.209	12.654	15.098	12.704	7.327	12.7374	3.853		12.648	42.191	12.654	94.771	12.704	78.983	12.7374	108.412			11.2613	42.583
12.693	17.445	12.699	15.252	12.749	7.511	12.7826	4.116		12.693	42.163	12.699	91.728	12.749	73.41	12.7826	99.897			11.3013	39.664
12.738	17.646	12.744	15.421	12.794	7.716	12.8277	4.439		12.738	42.175	12.744	87.523	12.794	67.425	12.8277	91.355			11.3412	37.08
12.783	18.131	12.789	15.693	12.839	7.984	12.8729	4.834		12.783	41.706	12.789	82.499	12.839	61.085	12.8729	82.905			11.3811	34.826
12.827	18.578	12.834	15.964	12.884	8.294	12.9181	5.294		12.827	40.904	12.834	76.495	12.884	55.17	12.9181	74.72			11.4211	32.995
12.872	18.811	12.878	16.13	12.929	8.647	12.9632	5.834		12.872	39.797	12.878	69.518	12.929	49.462	12.9632	66.732			11.461	31.539
12.917	19.271	12.923	16.273	12.974	9.057	13.0084	6.399		12.917	37.885	12.923	62.327	12.974	44.063	13.0084	58.774			11.5009	30.385
12.962	19.556	12.968	16.619	13.019	9.559	13.0536	7.002		12.962	35.72	12.968	55.493	13.019	38.898	13.0536	51.027			11.5409	29.619
13.007	19.932	13.013	16.909	13.064	10.003	13.0987	7.608		13.007	33.319	13.013	49.271	13.064	34.21	13.0987	43.807			11.5808	29.165
13.052	20.508	13.058	17.102	13.109	10.465	13.1439	8.213		13.052	30.863	13.058	43.477	13.109	29.809	13.1439	37.286			11.6207	29.009
13.097	20.737	13.103	17.316	13.154	11.03	13.1891	8.81		13.097	28.176	13.103	38.373	13.154	25.634	13.1891	31.488			11.6607	29.16
13.141	20.903	13.148	17.742	13.199	11.581	13.2343	9.369		13.141	25.762	13.148	33.716	13.199	22.401	13.2343	26.318			11.7006	29.584
13.186	21.615	13.193	18.094	13.244	12.218	13.2794	9.802		13.186	23.553	13.193	29.828	13.244	19.756	13.2794	21.955			11.7405	30.269
13.231	21.983	13.237	18.355	13.29	12.91	13.3246	10.153		13.231	21.827	13.237	26.68	13.29	17.789	13.3246	18.416			11.7805	31.239
13.276	22.203	13.282	18.671	13.335	13.613	13.3698	10.413		13.276	20.339	13.282	23.98	13.335	16.246	13.3698	15.587			11.8204	32.527
13.321	22.646	13.327	19.107	13.38	14.285	13.4149	10.574		13.321	19.246	13.327	22.116	13.38	15.041	13.4149	13.362			11.8603	34.091
13.366	22.932	13.372	19.598	13.425	14.917	13.4601	10.64		13.366	18.56	13.372	20.712	13.425	14.103	13.4601	11.598			11.9003	36.076
13.411	23.248	13.417	20.017	13.47	15.588	13.5053	10.635		13.411	18.052	13.417	19.744	13.47	13.317	13.5053	10.305			11.9402	38.459
13.455	23.54	13.462	20.378	13.515	16.129	13.5504	10.566		13.455	17.642	13.462	18.985	13.515	12.61	13.5504	9.355			11.9801	41.479
13.5	23.776	13.507	20.729	13.56	16.672	13.5956	10.447		13.5	17.3	13.507	18.475	13.56	12.021	13.5956	8.645			12.0201	45.194
13.545	24.002	13.552	21.045	13.605	17.17	13.6408	10.277		13.545	16.983	13.552	17.939	13.605	11.452	13.6408	8.105			12.06	49.891
13.59	24.336	13.596	21.497	13.65	17.526	13.6859	10.095		13.59	16.761	13.596	17.533	13.65	10.941	13.6859	7.697			12.0999	55.758
13.635	24.632	13.641	21.856	13.695	17.862	13.7311	9.92		13.635	16.504	13.641	17.03	13.695	10.477	13.7311	7.353			12.1399	63.153
13.68	24.894	13.686	22.053	13.74	18.144	13.7763	9.76		13.68	16.411	13.686	16.81	13.74	10.019	13.7763	7.06			12.1798	72.37
13.725	25.273	13.731	22.261	13.785	18.412	13.8214	9.6		13.725	16.15	13.731	16.478	13.785	9.676	13.8214	6.802			12.2198	83.65
13.769	25.455	13.776	22.549	13.83	18.778	13.8666	9.485		13.769	16.212	13.776	16.143	13.83	9.346	13.8666	6.55			12.2597	97.367
13.814	25.957	13.821	22.602	13.875	19.255	13.9118	9.376		13.814	16.201	13.821	15.986	13.875	8.999	13.9118	6.297			12.2996	113.501
13.859	26.281	13.866	22.635	13.92	19.671	13.9569	9.289		13.859	16.036	13.866	15.657	13.92	8.718	13.9569	6.054			12.3396	132.296
13.904	26.442	13.91	22.651	13.965	20.132	14.0021	9.241		13.904	15.856	13.91	15.475	13.965	8.565	14.0021	5.842			12.3795	153.613
13.949	26.854	13.955	22.586	14.01	20.535	14.0473	9.224		13.949	15.736	13.955	15.297	14.01	8.316	14.0473	5.639			12.4194	177.325
13.994	27.1	14	22.502	14.055	20.83	14.0924	9.231		13.994	15.84	14	15.22	14.055	8.094	14.0924	5.42			12.4594	202.866
14.038	27.356	14.045	22.199	14.1	21.189	14.1376	9.262		14.038	15.649	14.045	15.081	14.1	8.005	14.1376	5.192			12.4993	229.793
14.083	27.911	14.09	21.986	14.145	21.555	14.1828	9.339		14.083	15.671	14.09	14.845	14.145	7.778	14.1828	4.986			12.5392	257.402
14.128	28.183	14.135	21.702	14.191	21.869	14.228	9.477		14.128	15.696	14.135	14.663	14.191	7.626	14.228	4.77			12.5792	284.616
14.173	28.724	14.18	21.519	14.236	22.458	14.2731	9.667		14.173	15.533	14.18	14.617	14.236	7.489	14.2731	4.553			12.6191	311.026
14.218	29.621	14.225	21.479	14.281	23.057	14.3183	9.965		14.218	15.36	14.225	14.383	14.281	7.316	14.3183	4.331			12.659	335.222
14.263	30.557	14.269	21.435	14.326	23.816	14.3635	10.34		14.263	15.218	14.269	14.284	14.326	7.126	14.3635	4.099			12.699	356.574
14.308	31.958	14.314	21.436	14.371	24.643	14.4086	10.867		14.308	15.191	14.314	14.213	14.371	7.007	14.4086	3.901			12.7389	374.159
14.352	33.286	14.359	21.543	14.416	25.441	14.4538	11.522		14.352	15.181	14.359	14.053	14.416	6.896	14.4538	3.679			12.7788	387.354
14.397	34.651	14.404	21.577	14.461	26.278	14.499	12.342		14.397	15.078	14.404	13.931	14.461	6.835	14.499	3.449			12.8188	395.55
14.442	36.569	14.449	21.691	14.506	27.162	14.5441	13.374		14.442	15.054	14.449	13.808	14.506	6.752	14.5441	3.264			12.8587	398.454
14.487	38.741	14.494	21.945	14.551	28.052	14.5893	14.598		14.487	15.081	14.494	13.803	14.551	6.658	14.5893	3.115			12.8986	396.076
14.532	41.374	14.539	22.204	14.596	28.739	14.6345	15.984		14.532	15.056	14.539	13.843	14.596	6.555	14.6345	3.013			12.9386	388.768
14.577	44.801	14.584	22.325	14.641	29.524	14.6796	17.594		14.577	15.143	14.584	13.74	14.641	6.556	14.6796	2.982			12.9785	376.929
14.622	49.585	14.628	22.706	14.686	30.303	14.7248	19.399		14.622	15.005	14.628	13.728	14.686	6.608	14.7248	3.056			13.0184	361.249
14.666	55.787	14.673	23.178	14.731	31.172	14.77	21.459		14.666	15.111	14.673	13.762	14.731	6.656	14.77	3.241			13.0584	342.454
14.711	64.005	14.718	23.812	14.776	32.265	14.8151	23.791		14.711	15.19	14.718	13.768	14.776	6.887	14.8151	3.613			13.0983	321.417
14.756	73.749	14.763	24.965	14.821	33.831	14.8603	26.651		14.756	15.119	14.763	13.656	14.821	7.311	14.8603	4.271			13.1382	299.168
14.801	84.778	14.808	26.57	14.866	35.903	14.9055	30.423		14.801	15.466	14.808	13.761	14.866	7.98	14.9055	5.157			13.1782	276.295
14.846	96.947	14.853	29.363	14.911	39.117	14.9506	35.392		14.846	15.674	14.853	13.963	14.911	8.878	14.9506	6.35			13.2181	253.796
14.891	109.28	14.898	33.367	14.956	43.273	14.9958	41.657		14.891	15.915	14.898	14.29	14.956	10.247	14.9958	7.895			13.258	232.079
14.936	121.587	14.943	38.734	15.001	48.98	15.041	49.08		14.936	16.62	14.943	14.718	15.001	12.023	15.041	9.777			13.298	211.768
14.98	134.016	14.987	46.068	15.046	57.108	15.0861	57.446		14.98	17.397	14.987	15.432	15.046	14.528	15.0861	11.94			13.3379	193.041
15.025	145.49	15.032	54.721	15.092	67.68	15.1313	66.421		15.025	18.188	15.032	16.615	15.092	17.427	15.1313	14.328			13.3778	176.24
15.07	156.144	15.077	64.571	15.137	81.055	15.1765	75.755		15.07	19.278	15.077	18.153	15.137	20.915	15.1765	16.82			13.4178	161.363
15.115	165.766	15.122	75.193	15.182	96.668	15.2217	85.521		15.115	20.79	15.122	20.369	15.182	24.859	15.2217	19.332			13.4577	148.318
15.16	174.292	15.167	86.272	15.227	114.341	15.2668	95.548		15.16	22.151	15.167	23.297	15.227	28.992	15.2668	21.679			13.4976	137.058
15.205	181.584	15.212	97.374	15.272	133.674	15.312	105.618		15.205	23.72	15.212	26.844	15.272	33.094	15.312	23.833			13.5376	127.38
15.249	187.39	15.257	108.009	15.317	154.47	15.3572	115.732		15.249	25.207	15.257	31.031	15.317	36.808	15.3572	25.728			13.5775	119.035
15.294	192.268	15.302	118.13	15.362	177.522	15.4023	125.945		15.294	26.558	15.302	35.806	15.362	40.155	15.4023	27.225			13.6174	111.768
15.339	196.628	15.346	127.961	15.407	204.157	15.4475	136.371		15.339	27.612	15.346	40.439	15.407	42.534	15.4475	28.254			13.6574	105.381
15.384	199.668	15.391	137.361	15.452	230.464	15.4927	146.832		15.384	28.421	15.391	44.729	15.452	44.031	15.4927	28.788			13.6973	99.607
15.429	202.219	15.436	146.532	15.497	256.714	15.5378	157.364		15.429	28.96	15.436	48.659	15.497	44.474	15.5378	28.853			13.7372	94.249
15.474	204.705	15.481	155.464	15.542	279.887	15.583	167.997		15.474	28.97	15.481	51.731	15.542	43.87	15.583	28.473			13.7772	89.19
15.519	207.593	15.526	164.246	15.587	298.247	15.6282	178.019		15.519	28.616	15.526	53.466	15.587	42.289	15.6282	27.72			13.8171	84.272
15.563	211.255	15.571	173.017	15.632	310	15.6733	186.757		15.563	27.693	15.571	53.934	15.632	39.892	15.6733	26.646			13.857	79.451
15.608	217.366	15.616	182.436	15.677	314.634	15.7185	193.673		15.608	26.931	15.616	53.134	15.677	36.985	15.7185	25.309			13.897	74.648
15.653	226.635	15.661	192.782	15.722	313.421	15.7637	198.411		15.653	25.846	15.661	51.148	15.722	33.575	15.7637	23.788			13.9369	69.906
15.698	240.126	15.705	205.411	15.767	307.776	15.8088	200.838		15.698	24.478	15.705	48.308	15.767	30.229	15.8088	22.127			13.9768	65.273
15.743	258.839	15.75	221.232	15.812	300.433	15.854	200.965		15.743	23.238	15.75	44.813	15.812	26.926	15.854	20.412			14.0168	60.649
15.788	282.859	15.795	240.969	15.857	292.999	15.8992	199.097		15.788	21.891	15.795	40.899	15.857	23.693	15.8992	18.672			14.0567	56.248
15.833	310.489	15.84	265.393	15.902	287.054	15.9443	195.448		15.833	20.712	15.84	36.797	15.902	20.73	15.9443	16.988			14.0966	52.059
15.877	339.699	15.885	294.055	15.947	283.025	15.9895	190.361		15.877	19.814	15.885	33.026	15.947	18.073	15.9895	15.372			14.1366	48.156
15.922	367.948	15.93	324.957	15.992	280.081	16.0347	184.147		15.922	18.944	15.93	29.459	15.992	15.781	16.0347	13.761			14.1765	44.522
15.967	391.869	15.975	355.071	16.038	276.737	16.0798	177.212		15.967	18.097	15.975	26.497	16.038	13.945	16.0798	12.211			14.2164	41.237
16.012	408.451	16.02	380.32	16.083	271.253	16.125	169.828		16.012	17.446	16.02	23.82	16.083	12.403	16.125	10.765			14.2564	38.321
16.057	416.622	16.064	397.013	16.128	263.081	16.1702	162.263		16.057	16.811	16.064	21.64	16.128	11.057	16.1702	9.382			14.2963	35.758
16.102	415.138	16.109	402.972	16.173	251.636	16.2153	154.808		16.102	16.441	16.109	19.894	16.173	9.947	16.2153	8.115			14.3362	33.558
16.146	404.406	16.154	398.564	16.218	236.748	16.2605	147.308		16.146	16.14	16.154	18.545	16.218	9.097	16.2605	6.952			14.3762	31.69
16.191	384.849	16.199	384.314	16.263	219.37	16.3057	139.743		16.191	15.679	16.199	17.46	16.263	8.365	16.3057	5.933			14.4161	30.135
16.236	358.921	16.244	362.141	16.308	200.17	16.3509	132.285		16.236	15.452	16.244	16.611	16.308	7.849	16.3509	5.025			14.456	28.908
16.281	328.123	16.289	334.244	16.353	180.328	16.396	124.959		16.281	15.416	16.289	15.877	16.353	7.354	16.396	4.218			14.496	27.991
16.326	294.788	16.334	302.721	16.398	161.025	16.4412	117.83		16.326	15.277	16.334	15.486	16.398	6.873	16.4412	3.537			14.5359	27.371
16.371	260.411	16.378	269.141	16.443	141.209	16.4864	110.839		16.371	15.262	16.378	14.997	16.443	6.63	16.4864	3.003			14.5758	27.079
16.416	226.482	16.423	235.482	16.488	123.784	16.5315	104.118		16.416	15.078	16.423	14.629	16.488	6.416	16.5315	2.591			14.6158	27.139
16.46	194.493	16.468	202.725	16.533	107.386	16.5767	97.762		16.46	15.1	16.468	14.363	16.533	6.232	16.5767	2.322			14.6557	27.629
16.505	165.863	16.513	172.123	16.578	92.351	16.6219	91.529		16.505	15.303	16.513	14.244	16.578	6.129	16.6219	2.13			14.6956	28.619
16.55	140.552	16.558	144.326	16.623	79.04	16.667	85.456		16.55	15.504	16.558	14.017	16.623	6.105	16.667	2.012			14.7356	30.255
16.595	118.798	16.603	119.801	16.668	67.472	16.7122	79.65		16.595	15.361	16.603	13.896	16.668	6.002	16.7122	1.966			14.7755	32.808
16.64	100.594	16.648	98.67	16.713	57.665	16.7574	74.127		16.64	15.473	16.648	13.93	16.713	5.948	16.7574	1.973			14.8154	36.525
16.685	85.639	16.693	81.277	16.758	49.204	16.8025	68.887		16.685	15.467	16.693	13.854	16.758	6.044	16.8025	2.027			14.8554	41.723
16.73	73.373	16.737	67.13	16.803	42.25	16.8477	63.899		16.73	15.466	16.737	13.913	16.803	6.174	16.8477	2.104			14.8953	48.578
16.774	63.467	16.782	55.898	16.848	36.649	16.8929	59.243		16.774	15.678	16.782	13.854	16.848	6.107	16.8929	2.231			14.9353	57.48
16.819	55.381	16.827	47.08	16.893	31.878	16.938	54.827		16.819	15.997	16.827	13.909	16.893	6.167	16.938	2.328			14.9752	68.343
16.864	48.921	16.872	40.427	16.939	27.808	16.9832	50.489		16.864	16.001	16.872	13.98	16.939	6.323	16.9832	2.446			15.0151	81.217
16.909	43.711	16.917	35.276	16.984	24.6	17.0284	46.297		16.909	16.072	16.917	14.028	16.984	6.435	17.0284	2.573			15.0551	95.757
16.954	39.373	16.962	31.441	17.029	21.922	17.0735	42.273		16.954	16.365	16.962	14.103	17.029	6.614	17.0735	2.701			15.095	111.652
16.999	35.816	17.007	28.427	17.074	19.61	17.1187	38.398		16.999	16.495	17.007	14.329	17.074	6.719	17.1187	2.824			15.1349	128.362
17.044	32.846	17.052	26.123	17.119	17.751	17.1639	34.703		17.044	16.445	17.052	14.363	17.119	6.843	17.1639	2.965			15.1749	145.266
17.088	30.596	17.096	24.394	17.164	16.181	17.209	31.165		17.088	16.628	17.096	14.451	17.164	6.986	17.209	3.11			15.2148	162.005
17.133	28.661	17.141	22.982	17.209	14.901	17.2542	27.935		17.133	16.934	17.141	14.55	17.209	7.111	17.2542	3.268			15.2547	177.733
17.178	26.824	17.186	21.834	17.254	13.772	17.2994	24.891		17.178	17.078	17.186	14.571	17.254	7.327	17.2994	3.445			15.2947	191.98
17.223	25.552	17.231	21.043	17.299	12.812	17.3446	21.995		17.223	17.169	17.231	14.682	17.299	7.511	17.3446	3.639			15.3346	203.923
17.268	24.531	17.276	20.365	17.344	11.995	17.3897	19.308		17.268	17.209	17.276	14.951	17.344	7.716	17.3897	3.853			15.3745	213.145
17.313	23.427	17.321	19.712	17.389	11.33	17.4349	16.903		17.313	17.445	17.321	14.877	17.389	7.984	17.4349	4.116			15.4145	218.982
17.357	22.561	17.366	19.183	17.434	10.8	17.4801	14.728		17.357	17.646	17.366	15.098	17.434	8.294	17.4801	4.439			15.4544	221.032
17.402	22.039	17.411	18.762	17.479	10.288	17.5252	12.801		17.402	18.131	17.411	15.252	17.479	8.647	17.5252	4.834			15.4943	219.301
17.447	21.461	17.455	18.532	17.524	9.795	17.5704	12.486		17.447	18.578	17.455	15.421	17.524	9.057	17.5704	5.294			15.5343	213.9
17.492	21.017	17.5	18.325	17.569	9.419	17.6156	18.403		17.492	18.811	17.5	15.693	17.569	9.559	17.6156	5.834			15.5742	205.217
17.537	20.614	17.545	17.974	17.614	9.129	17.6607	31.841		17.537	19.271	17.545	15.964	17.614	10.003	17.6607	6.399			15.6141	193.827
17.582	20.106	17.59	17.738	17.659	8.762	17.7059	44.574		17.582	19.556	17.59	16.13	17.659	10.465	17.7059	7.002			15.6541	180.413
17.627	19.813	17.635	17.49	17.704	8.493	17.7511	53.31		17.627	19.932	17.635	16.273	17.704	11.03	17.7511	7.608			15.694	165.68
17.671	19.545	17.68	17.293	17.749	8.33	17.7962	59.084		17.671	20.508	17.68	16.619	17.749	11.581	17.7962	8.213			15.7339	150.138
17.716	19.334	17.725	17.212	17.794	8.055	17.8414	62.91		17.716	20.737	17.725	16.909	17.794	12.218	17.8414	8.81			15.7739	134.341
17.761	19.026	17.77	17.133	17.84	7.844	17.8866	65.584		17.761	20.903	17.77	17.102	17.84	12.91	17.8866	9.369			15.8138	118.773
17.806	18.769	17.814	17.02	17.885	7.774	17.9317	67.591		17.806	21.615	17.814	17.316	17.885	13.613	17.9317	9.802			15.8537	103.833
17.851	18.624	17.859	16.945	17.93	7.629	17.9769	69.204		17.851	21.983	17.859	17.742	17.93	14.285	17.9769	10.153			15.8937	90.023
17.896	18.529	17.904	16.811	17.975	7.374	18.0221	70.601		17.896	22.203	17.904	18.094	17.975	14.917	18.0221	10.413			15.9336	77.478
17.941	18.403	17.949	16.776	18.02	7.164	18.0672	71.784		17.941	22.646	17.949	18.355	18.02	15.588	18.0672	10.574			15.9735	66.404
17.985	18.269	17.994	16.77	18.065	7.046	18.1124	72.822		17.985	22.932	17.994	18.671	18.065	16.129	18.1124	10.64			16.0135	56.808
18.03	18.006	18.039	16.669	18.11	6.896	18.1576	73.732		18.03	23.248	18.039	19.107	18.11	16.672	18.1576	10.635			16.0534	48.626
18.075	17.968	18.084	16.628	18.155	6.771	18.2027	74.464		18.075	23.54	18.084	19.598	18.155	17.17	18.2027	10.566			16.0933	41.752
18.12	17.865	18.129	16.61	18.2	6.649	18.2479	75.045		18.12	23.776	18.129	20.017	18.2	17.526	18.2479	10.447			16.1333	35.973
18.165	17.699	18.173	16.448	18.245	6.539	18.2931	75.541		18.165	24.002	18.173	20.378	18.245	17.862	18.2931	10.277			16.1732	31.158
18.21	17.494	18.218	16.358	18.29	6.412	18.3382	75.928		18.21	24.336	18.218	20.729	18.29	18.144	18.3382	10.095			16.2131	27.098
18.255	17.523	18.263	16.34	18.335	6.276	18.3834	76.212		18.255	24.632	18.263	21.045	18.335	18.412	18.3834	9.92			16.2531	23.693
18.299	17.601	18.308	16.275	18.38	6.113	18.4286	76.374		18.299	24.894	18.308	21.497	18.38	18.778	18.4286	9.76			16.293	20.819
18.344	17.303	18.353	16.086	18.425	6.008	18.4738	76.46		18.344	25.273	18.353	21.856	18.425	19.255	18.4738	9.6			16.3329	18.466
18.389	17.197	18.398	16.077	18.47	5.919	18.5189	76.441		18.389	25.455	18.398	22.053	18.47	19.671	18.5189	9.485			16.3729	16.469
18.434	17.034	18.443	15.833	18.515	5.815	18.5641	76.251		18.434	25.957	18.443	22.261	18.515	20.132	18.5641	9.376			16.4128	14.796
18.479	16.813	18.487	15.792	18.56	5.754	18.6093	75.937		18.479	26.281	18.487	22.549	18.56	20.535	18.6093	9.289			16.4527	13.505
18.524	16.434	18.532	15.535	18.605	5.752	18.6544	75.456		18.524	26.442	18.532	22.602	18.605	20.83	18.6544	9.241			16.4927	12.598
18.568	15.82	18.577	15.388	18.65	5.742	18.6996	74.798		18.568	26.854	18.577	22.635	18.65	21.189	18.6996	9.224			16.5326	12.139
18.613	15.061	18.622	14.938	18.695	5.782	18.7448	73.984		18.613	27.1	18.622	22.651	18.695	21.555	18.7448	9.231			16.5725	12.341
18.658	13.836	18.667	14.443	18.74	5.857	18.7899	73.014		18.658	27.356	18.667	22.586	18.74	21.869	18.7899	9.262			16.6125	13.558
18.703	11.753	18.712	13.624	18.786	5.991	18.8351	71.805		18.703	27.911	18.712	22.502	18.786	22.458	18.8351	9.339			16.6524	16.292
18.748	9.08	18.757	12.451	18.831	6.263	18.8803	70.325		18.748	28.183	18.757	22.199	18.831	23.057	18.8803	9.477			16.6923	21.342
18.793	6.461	18.802	10.761	18.876	6.774	18.9254	68.589		18.793	28.724	18.802	21.986	18.876	23.816	18.9254	9.667			16.7323	29.529
18.838	4.21	18.846	8.529	18.921	7.399	18.9706	66.63		18.838	29.621	18.846	21.702	18.921	24.643	18.9706	9.965			16.7722	41.72
18.882	2.721	18.891	5.914	18.966	8.169	19.0158	64.451		18.882	30.557	18.891	21.519	18.966	25.441	19.0158	10.34			16.8121	58.495
18.927	1.896	18.936	3.131	19.011	9.181	19.0609	62.108		18.927	31.958	18.936	21.479	19.011	26.278	19.0609	10.867			16.8521	79.949
18.972	1.124	18.981	0.812	19.056	10.585	19.1061	60.07		18.972	33.286	18.981	21.435	19.056	27.162	19.1061	11.522			16.892	105.957
19.017	0.337	19.026	-0.43	19.101	12.198	19.1513	59.178		19.017	34.651	19.026	21.436	19.101	28.052	19.1513	12.342			16.9319	135.808
19.062	-0.329	19.071	-1.1	19.146	14.295	19.1964	59.363		19.062	36.569	19.071	21.543	19.146	28.739	19.1964	13.374			16.9719	168.834
19.107	-1.32	19.116	-1.443	19.191	16.67	19.2416	59.554		19.107	38.741	19.116	21.577	19.191	29.524	19.2416	14.598			17.0118	204.016
19.152	-2.517	19.161	-1.397	19.236	19.49	19.2868	59.842		19.152	41.374	19.161	21.691	19.236	30.303	19.2868	15.984			17.0517	241.045
19.196	-3.975	19.205	-1.061	19.281	22.65	19.3319	60.456		19.196	44.801	19.205	21.945	19.281	31.172	19.3319	17.594			17.0917	278.122
19.241	-5.533	19.25	-0.173	19.326	26.051	19.3771	60.264		19.241	49.585	19.25	22.204	19.326	32.265	19.3771	19.399			17.1316	314.332
19.286	-6.632	19.295	1.259	19.371	29.513	19.4223	59.153		19.286	55.787	19.295	22.325	19.371	33.831	19.4223	21.459			17.1715	348.334
19.331	-7.583	19.34	2.876	19.416	32.67	19.4675	58.045		19.331	64.005	19.34	22.706	19.416	35.903	19.4675	23.791			17.2115	377.942
19.376	-9.281	19.385	4.58	19.461	35.021	19.5126	56.671		19.376	73.749	19.385	23.178	19.461	39.117	19.5126	26.651			17.2514	401.848
19.421	-13.183	19.43	6.647	19.506	36.304	19.5578	54.663		19.421	84.778	19.43	23.812	19.506	43.273	19.5578	30.423			17.2913	417.772
19.465	-20.102	19.475	8.589	19.551	37.078	19.603	52.783		19.465	96.947	19.475	24.965	19.551	48.98	19.603	35.392			17.3313	424.996
19.51	-28.596	19.52	10.554	19.596	38.007	19.6481	52.438		19.51	109.28	19.52	26.57	19.596	57.108	19.6481	41.657			17.3712	422.709
19.555	-36.727	19.564	12.086	19.641	39.496	19.6933	56.183		19.555	121.587	19.564	29.363	19.641	67.68	19.6933	49.08			17.4111	411.557
19.6	-44.302	19.609	13.299	19.687	41.126	19.7385	60.05		19.6	134.016	19.609	33.367	19.687	81.055	19.7385	57.446			17.4511	392.718
19.645	-50.466	19.654	13.959	19.732	42.228	19.7836	51.756		19.645	145.49	19.654	38.734	19.732	96.668	19.7836	66.421			17.491	367.791
19.69	-55.012	19.699	14.23	19.777	42.42	19.8288	37.869		19.69	156.144	19.699	46.068	19.777	114.341	19.8288	75.755			17.5309	338.21
19.735	-58.892	19.744	14.509	19.822	41.925	19.874	28.224		19.735	165.766	19.744	54.721	19.822	133.674	19.874	85.521			17.5709	305.804
19.779	-60.525	19.789	15.09	19.867	41.996	19.9191	25.5		19.779	174.292	19.789	64.571	19.867	154.47	19.9191	95.548			17.6108	271.535
19.824	-60.3	19.834	16.257	19.912	43.172	19.9643	26.532		19.824	181.584	19.834	75.193	19.912	177.522	19.9643	105.618			17.6508	236.723
19.869	-60.231	19.879	17.911	19.957	43.065	20.0095	27.89		19.869	187.39	19.879	86.272	19.957	204.157	20.0095	115.732			17.6907	202.613
19.914	-60.216	19.923	20.133	20.002	39.339	20.0546	28.237		19.914	192.268	19.923	97.374	20.002	230.464	20.0546	125.945			17.7306	170.175
19.959	-59.358	19.968	22.749	20.047	34.361	20.0998	27.337		19.959	196.628	19.968	108.009	20.047	256.714	20.0998	136.371			17.7706	140.411
20.004	-57.303	20.013	25.179	20.092	30.556	20.145	24.852		20.004	199.668	20.013	118.13	20.092	279.887	20.145	146.832			17.8105	113.732
20.049	-56.01	20.058	26.449	20.137	28.001	20.1901	21.281		20.049	202.219	20.058	127.961	20.137	298.247	20.1901	157.364			17.8504	90.878
20.093	-56.656	20.103	23.963	20.182	26.059	20.2353	17.64		20.093	204.705	20.103	137.361	20.182	310	20.2353	167.997			17.8904	71.743
20.138	-57.984	20.148	16.346	20.227	24.663	20.2805	14.599		20.138	207.593	20.148	146.532	20.227	314.634	20.2805	178.019			17.9303	56.215
20.183	-57.974	20.193	8.01	20.272	23.624	20.3256	12.366		20.183	211.255	20.193	155.464	20.272	313.421	20.3256	186.757			17.9702	43.916
20.228	-55.698	20.238	1.74	20.317	22.887	20.3708	10.473		20.228	217.366	20.238	164.246	20.317	307.776	20.3708	193.673			18.0102	34.332
20.273	-51.637	20.282	-1.25	20.362	22.76	20.416	8.451		20.273	226.635	20.282	173.017	20.362	300.433	20.416	198.411			18.0501	26.985
20.318	-46.6	20.327	-0.19	20.407	23.289	20.4612	6.293		20.318	240.126	20.327	182.436	20.407	292.999	20.4612	200.838			18.09	21.467
20.363	-40.887	20.372	3.816	20.452	23.989	20.5063	4.215		20.363	258.839	20.372	192.782	20.452	287.054	20.5063	200.965			18.13	17.309
20.407	-34.739	20.417	8.665	20.497	23.486	20.5515	2.338		20.407	282.859	20.417	205.411	20.497	283.025	20.5515	199.097			18.1699	14.161
20.452	-28.357	20.462	13.348	20.542	21.788	20.5967	0.797		20.452	310.489	20.462	221.232	20.542	280.081	20.5967	195.448			18.2098	11.877
20.497	-21.948	20.507	17.878	20.588	21.449	20.6418	-0.157		20.497	339.699	20.507	240.969	20.588	276.737	20.6418	190.361			18.2498	10.137
20.542	-15.024	20.552	22.519	20.633	23.095	20.687	-0.536		20.542	367.948	20.552	265.393	20.633	271.253	20.687	184.147			18.2897	8.853
20.587	-7.478	20.597	26.704	20.678	24.785	20.7322	-0.75		20.587	391.869	20.597	294.055	20.678	263.081	20.7322	177.212			18.3296	7.874
20.632	1.157	20.641	29.481	20.723	25.591	20.7773	-0.925		20.632	408.451	20.641	324.957	20.723	251.636	20.7773	169.828			18.3696	7.108
20.676	11.476	20.686	30.446	20.768	25.342	20.8225	-0.931		20.676	416.622	20.686	355.071	20.768	236.748	20.8225	162.263			18.4095	6.563
20.721	22.59	20.731	30.046	20.813	23.521	20.8677	-0.823		20.721	415.138	20.731	380.32	20.813	219.37	20.8677	154.808			18.4494	6.073
20.766	33.5	20.776	28.591	20.858	20.182	20.9128	-0.797		20.766	404.406	20.776	397.013	20.858	200.17	20.9128	147.308			18.4894	5.689
20.811	43.245	20.821	27.954	20.903	16.486	20.958	-0.912		20.811	384.849	20.821	402.972	20.903	180.328	20.958	139.743			18.5293	5.422
20.856	51.312	20.866	29.674	20.948	13.567	21.0032	-0.997		20.856	358.921	20.866	398.564	20.948	161.025	21.0032	132.285			18.5692	5.174
20.901	57.192	20.911	33.741	20.993	11.884	21.0483	-0.968		20.901	328.123	20.911	384.314	20.993	141.209	21.0483	124.959			18.6092	4.938
20.946	62.258	20.955	39.1	21.038	11.315	21.0935	-0.771		20.946	294.788	20.955	362.141	21.038	123.784	21.0935	117.83			18.6491	4.778
20.99	67.42	21	44.262	21.083	11.064	21.1387	-0.363		20.99	260.411	21	334.244	21.083	107.386	21.1387	110.839			18.689	4.56
21.035	72.836	21.045	47.178	21.128	11.078	21.1838	0.082		21.035	226.482	21.045	302.721	21.128	92.351	21.1838	104.118			18.729	4.41
21.08	75.558	21.09	46.141	21.173	11.292	21.229	0.277		21.08	194.493	21.09	269.141	21.173	79.04	21.229	97.762			18.7689	4.311
21.125	71.714	21.135	41.274	21.218	11.425	21.2742	0.284		21.125	165.863	21.135	235.482	21.218	67.472	21.2742	91.529			18.8088	4.202
21.17	61.658	21.18	33.925	21.263	10.894	21.3193	0.595		21.17	140.552	21.18	202.725	21.263	57.665	21.3193	85.456			18.8488	4.132
21.215	48.089	21.225	26.069	21.308	9.43	21.3645	1.344		21.215	118.798	21.225	172.123	21.308	49.204	21.3645	79.65			18.8887	4.052
21.26	34.41	21.27	18.516	21.353	7.294	21.4097	2.069		21.26	100.594	21.27	144.326	21.353	42.25	21.4097	74.127			18.9286	3.978
21.304	22.278	21.314	11.956	21.398	6.02	21.4548	2.273		21.304	85.639	21.314	119.801	21.398	36.649	21.4548	68.887			18.9686	3.968
21.349	11.206	21.359	6.221	21.443	5.806	21.5	1.823		21.349	73.373	21.359	98.67	21.443	31.878	21.5	63.899			19.0085	3.931
21.394	1.455	21.404	1.473	21.489	6.157	21.5452	0.847		21.394	63.467	21.404	81.277	21.489	27.808	21.5452	59.243			19.0484	3.912
21.439	-6.397	21.449	-2.28	21.534	6.368	21.5904	-0.361		21.439	55.381	21.449	67.13	21.534	24.6	21.5904	54.827			19.0884	3.87
21.484	-12.791	21.494	-4.825	21.579	6.153	21.6355	-1.501		21.484	48.921	21.494	55.898	21.579	21.922	21.6355	50.489			19.1283	3.87
21.529	-17.573	21.539	-6.374	21.624	5.709	21.6807	-2.35		21.529	43.711	21.539	47.08	21.624	19.61	21.6807	46.297			19.1682	3.866
21.574	-21.169	21.584	-6.796	21.669	5.203	21.7259	-2.816		21.574	39.373	21.584	40.427	21.669	17.751	21.7259	42.273			19.2082	3.906
21.618	-22.988	21.629	-6.164	21.714	4.836	21.771	-2.917		21.618	35.816	21.629	35.276	21.714	16.181	21.771	38.398			19.2481	3.949
21.663	-22.668	21.673	-4.704	21.759	4.582	21.8162	-2.727		21.663	32.846	21.673	31.441	21.759	14.901	21.8162	34.703			19.288	4.054
21.708	-20.045	21.718	-2.585	21.804	4.464	21.8614	-2.354		21.708	30.596	21.718	28.427	21.804	13.772	21.8614	31.165			19.328	4.15
21.753	-15.814	21.763	0.117	21.849	4.424	21.9065	-1.915		21.753	28.661	21.763	26.123	21.849	12.812	21.9065	27.935			19.3679	4.339
21.798	-10.776	21.808	3.146	21.894	4.388	21.9517	-1.502		21.798	26.824	21.808	24.394	21.894	11.995	21.9517	24.891			19.4078	4.638
21.843	-5.626	21.853	5.979	21.939	4.374	21.9969	-1.149		21.843	25.552	21.853	22.982	21.939	11.33	21.9969	21.995			19.4478	5.076
21.887	-0.805	21.898	8.28	21.984	4.358	22.042	-0.869		21.887	24.531	21.898	21.834	21.984	10.8	22.042	19.308			19.4877	5.86
21.932	3.376	21.943	10.128	22.029	4.357	22.0872	-0.688		21.932	23.427	21.943	21.043	22.029	10.288	22.0872	16.903			19.5276	7.314
21.977	6.281	21.988	11.383	22.074	4.34	22.1324	-0.577		21.977	22.561	21.988	20.365	22.074	9.795	22.1324	14.728			19.5676	9.92
22.022	8.231	22.032	12.064	22.119	4.354	22.1775	-0.489		22.022	22.039	22.032	19.712	22.119	9.419	22.1775	12.801			19.6075	14.455
22.067	9.455	22.077	12.457	22.164	4.38	22.2227	-0.44		22.067	21.461	22.077	19.183	22.164	9.129	22.2227	12.486			19.6474	21.907
22.112	10.29	22.122	12.735	22.209	4.403	22.2679	-0.455		22.112	21.017	22.122	18.762	22.209	8.762	22.2679	18.403			19.6874	33.213
22.157	10.576	22.167	13.003	22.254	4.358	22.313	-0.475		22.157	20.614	22.167	18.532	22.254	8.493	22.313	31.841			19.7273	49.291
22.201	10.788	22.212	12.937	22.299	4.32	22.3582	-0.5		22.201	20.106	22.212	18.325	22.299	8.33	22.3582	44.574			19.7672	70.827
22.246	10.89	22.257	12.912	22.344	4.315	22.4034	-0.555		22.246	19.813	22.257	17.974	22.344	8.055	22.4034	53.31			19.8072	97.845
22.291	10.905	22.302	13.034	22.389	4.268	22.4485	-0.62		22.291	19.545	22.302	17.738	22.389	7.844	22.4485	59.084			19.8471	130.402
22.336	11.102	22.347	12.998	22.435	4.194	22.4937	-0.691		22.336	19.334	22.347	17.49	22.435	7.774	22.4937	62.91			19.887	167.925
22.381	11.136	22.391	12.942	22.48	4.113	22.5389	-0.75		22.381	19.026	22.391	17.293	22.48	7.629	22.5389	65.584			19.927	210.224
22.426	11.179	22.436	13.013	22.525	4.096	22.5841	-0.801		22.426	18.769	22.436	17.212	22.525	7.374	22.5841	67.591			19.9669	256.175
22.471	11.277	22.481	13.099	22.57	4.062	22.6292	-0.866		22.471	18.624	22.481	17.133	22.57	7.164	22.6292	69.204			20.0068	304.733
22.515	11.21	22.526	13.077	22.615	4.053	22.6744	-0.923		22.515	18.529	22.526	17.02	22.615	7.046	22.6744	70.601			20.0468	354.466
22.56	11.399	22.571	13.078	22.66	4.038	22.7196	-0.995		22.56	18.403	22.571	16.945	22.66	6.896	22.7196	71.784			20.0867	402.854
22.605	11.472	22.616	13.183	22.705	3.983	22.7647	-1.069		22.605	18.269	22.616	16.811	22.705	6.771	22.7647	72.822			20.1266	447.675
22.65	11.482	22.661	13.307	22.75	3.935	22.8099	-1.106		22.65	18.006	22.661	16.776	22.75	6.649	22.8099	73.732			20.1666	485.364
22.695	11.696	22.706	13.24	22.795	3.965	22.8551	-1.177		22.695	17.968	22.706	16.77	22.795	6.539	22.8551	74.464			20.2065	513.393
22.74	11.961	22.75	13.413	22.84	3.957	22.9002	-1.229		22.74	17.865	22.75	16.669	22.84	6.412	22.9002	75.045			20.2464	529.281
22.785	12.076	22.795	13.452	22.885	3.865	22.9454	-1.289		22.785	17.699	22.795	16.628	22.885	6.276	22.9454	75.541			20.2864	532.304
22.829	12.237	22.84	13.592	22.93	3.79	22.9906	-1.348		22.829	17.494	22.84	16.61	22.93	6.113	22.9906	75.928			20.3263	523.255
22.874	12.641	22.885	13.61	22.975	3.731	23.0357	-1.415		22.874	17.523	22.885	16.448	22.975	6.008	23.0357	76.212			20.3663	504.238
22.919	12.781	22.93	13.934	23.02	3.739	23.0809	-1.471		22.919	17.601	22.93	16.358	23.02	5.919	23.0809	76.374			20.4062	477.795
22.964	13.133	22.975	14.057	23.065	3.736	23.1261	-1.528		22.964	17.303	22.975	16.34	23.065	5.815	23.1261	76.46			20.4461	446.455
23.009	13.291	23.02	14.167	23.11	3.749	23.1712	-1.591		23.009	17.197	23.02	16.275	23.11	5.754	23.1712	76.441			20.4861	411.499
23.054	13.561	23.064	14.361	23.155	3.766	23.2164	-1.645		23.054	17.034	23.064	16.086	23.155	5.752	23.2164	76.251			20.526	374.275
23.098	13.745	23.109	14.477	23.2	3.741	23.2616	-1.676		23.098	16.813	23.109	16.077	23.2	5.742	23.2616	75.937			20.5659	335.204
23.143	14.056	23.154	14.653	23.245	3.823	23.3067	-1.684		23.143	16.434	23.154	15.833	23.245	5.782	23.3067	75.456			20.6059	294.957
23.188	14.174	23.199	14.966	23.29	3.892	23.3519	-1.678		23.188	15.82	23.199	15.792	23.29	5.857	23.3519	74.798			20.6458	254.455
23.233	14.505	23.244	15.065	23.336	3.942	23.3971	-1.655		23.233	15.061	23.244	15.535	23.336	5.991	23.3971	73.984			20.6857	214.885
23.278	15	23.289	15.046	23.381	4.02	23.4422	-1.601		23.278	13.836	23.289	15.388	23.381	6.263	23.4422	73.014			20.7257	177.569
23.323	15.257	23.334	15.245	23.426	4.036	23.4874	-1.486		23.323	11.753	23.334	14.938	23.426	6.774	23.4874	71.805			20.7656	143.506
23.368	15.54	23.379	15.359	23.471	4.05	23.5326	-1.367		23.368	9.08	23.379	14.443	23.471	7.399	23.5326	70.325			20.8055	113.639
23.412	15.784	23.423	15.494	23.516	4.099	23.5777	-1.256		23.412	6.461	23.423	13.624	23.516	8.169	23.5777	68.589			20.8455	88.457
23.457	16.316	23.468	15.749	23.561	4.146	23.6229	-1.099		23.457	4.21	23.468	12.451	23.561	9.181	23.6229	66.63			20.8854	68.002
23.502	16.854	23.513	16.082	23.606	4.269	23.6681	-0.88		23.502	2.721	23.513	10.761	23.606	10.585	23.6681	64.451			20.9253	51.893
23.547	17.06	23.558	16.304	23.651	4.383	23.7133	-0.572		23.547	1.896	23.558	8.529	23.651	12.198	23.7133	62.108			20.9653	39.532
23.592	17.532	23.603	16.723	23.696	4.439	23.7584	-0.137		23.592	1.124	23.603	5.914	23.696	14.295	23.7584	60.07			21.0052	30.304
23.637	18.203	23.648	17.12	23.741	4.51	23.8036	0.488		23.637	0.337	23.648	3.131	23.741	16.67	23.8036	59.178			21.0451	23.567
23.682	18.95	23.693	17.483	23.786	4.543	23.8488	1.447		23.682	-0.329	23.693	0.812	23.786	19.49	23.8488	59.363			21.0851	18.686
23.726	19.804	23.738	17.943	23.831	4.616	23.8939	2.823		23.726	-1.32	23.738	-0.43	23.831	22.65	23.8939	59.554			21.125	15.211
23.771	20.656	23.782	18.545	23.876	4.675	23.9391	4.6		23.771	-2.517	23.782	-1.1	23.876	26.051	23.9391	59.842			21.1649	12.749
23.816	21.575	23.827	19.035	23.921	4.774	23.9843	6.592		23.816	-3.975	23.827	-1.443	23.921	29.513	23.9843	60.456			21.2049	10.981
23.861	22.562	23.872	19.682	23.966	4.945	24.0294	8.525		23.861	-5.533	23.872	-1.397	23.966	32.67	24.0294	60.264			21.2448	9.72
23.906	23.536	23.917	20.297	24.011	5.155	24.0746	10.281		23.906	-6.632	23.917	-1.061	24.011	35.021	24.0746	59.153			21.2847	8.765
23.951	24.076	23.962	20.701	24.056	5.384	24.1198	11.82		23.951	-7.583	23.962	-0.173	24.056	36.304	24.1198	58.045			21.3247	8.058
23.995	22.902	24.007	20.784	24.101	5.775	24.1649	12.993		23.995	-9.281	24.007	1.259	24.101	37.078	24.1649	56.671			21.3646	7.433
24.04	20.865	24.052	21.078	24.146	6.418	24.2101	13.752		24.04	-13.183	24.052	2.876	24.146	38.007	24.2101	54.663			21.4045	6.901
24.085	19.772	24.097	21.749	24.191	7.494	24.2553	14.1		24.085	-20.102	24.097	4.58	24.191	39.496	24.2553	52.783			21.4445	6.422
24.13	19.959	24.141	22.496	24.237	8.949	24.3004	14.322		24.13	-28.596	24.141	6.647	24.237	41.126	24.3004	52.438			21.4844	5.968
24.175	20.902	24.186	23.136	24.282	10.807	24.3456	14.682		24.175	-36.727	24.186	8.589	24.282	42.228	24.3456	56.183			21.5243	5.555
24.22	21.979	24.231	22.971	24.327	12.548	24.3908	15.212		24.22	-44.302	24.231	10.554	24.327	42.42	24.3908	60.05			21.5643	5.147
24.265	23.233	24.276	22.814	24.372	13.606	24.4359	15.83		24.265	-50.466	24.276	12.086	24.372	41.925	24.4359	51.756			21.6042	4.778
24.309	24.855	24.321	23.071	24.417	13.985	24.4811	16.389		24.309	-55.012	24.321	13.299	24.417	41.996	24.4811	37.869			21.6441	4.381
24.354	26.786	24.366	24.46	24.462	14.169	24.5263	16.81		24.354	-58.892	24.366	13.959	24.462	43.172	24.5263	28.224			21.6841	4.027
24.399	28.98	24.411	26.492	24.507	14.794	24.5714	17.087		24.399	-60.525	24.411	14.23	24.507	43.065	24.5714	25.5			21.724	3.721
24.444	30.928	24.456	28.679	24.552	15.733	24.6166	17.237		24.444	-60.3	24.456	14.509	24.552	39.339	24.6166	26.532			21.7639	3.476
24.489	32.813	24.5	30.459	24.597	16.885	24.6618	17.298		24.489	-60.231	24.5	15.09	24.597	34.361	24.6618	27.89			21.8039	3.258
24.534	34.42	24.545	32.154	24.642	18.114	24.707	17.267		24.534	-60.216	24.545	16.257	24.642	30.556	24.707	28.237			21.8438	3.074
24.579	35.542	24.59	33.339	24.687	19.102	24.7521	17.201		24.579	-59.358	24.59	17.911	24.687	28.001	24.7521	27.337			21.8837	2.931
24.623	36.507	24.635	34.174	24.732	19.783	24.7973	17.156		24.623	-57.303	24.635	20.133	24.732	26.059	24.7973	24.852			21.9237	2.798
24.668	37.009	24.68	34.471	24.777	20.136	24.8425	17.138		24.668	-56.01	24.68	22.749	24.777	24.663	24.8425	21.281			21.9636	2.707
24.713	37.113	24.725	34.414	24.822	20.157	24.8876	17.132		24.713	-56.656	24.725	25.179	24.822	23.624	24.8876	17.64			22.0035	2.645
24.758	36.769	24.77	33.969	24.867	19.719	24.9328	17.179		24.758	-57.984	24.77	26.449	24.867	22.887	24.9328	14.599			22.0435	2.592
24.803	35.934	24.815	33.001	24.912	19.002	24.978	17.228		24.803	-57.974	24.815	23.963	24.912	22.76	24.978	12.366			22.0834	2.56
24.848	35.009	24.859	31.647	24.957	18.069	25.0231	17.295		24.848	-55.698	24.859	16.346	24.957	23.289	25.0231	10.473			22.1233	2.537
24.893	33.902	24.904	30.279	25.002	17.059	25.0683	17.32		24.893	-51.637	24.904	8.01	25.002	23.989	25.0683	8.451			22.1633	2.516
24.937	32.601	24.949	28.91	25.047	16.081	25.1135	17.299		24.937	-46.6	24.949	1.74	25.047	23.486	25.1135	6.293			22.2032	2.514
24.982	31.385	24.994	27.822	25.092	15.252	25.1586	17.204		24.982	-40.887	24.994	-1.25	25.092	21.788	25.1586	4.215			22.2431	2.499
25.027	30.527	25.039	26.905	25.137	14.744	25.2038	17.016		25.027	-34.739	25.039	-0.19	25.137	21.449	25.2038	2.338			22.2831	2.447
25.072	30.063	25.084	26.37	25.183	14.572	25.249	16.713		25.072	-28.357	25.084	3.816	25.183	23.095	25.249	0.797			22.323	2.478
25.117	30.021	25.129	26.463	25.228	14.778	25.2941	16.309		25.117	-21.948	25.129	8.665	25.228	24.785	25.2941	-0.157			22.3629	2.52
25.162	30.114	25.174	26.857	25.273	15.274	25.3393	15.774		25.162	-15.024	25.174	13.348	25.273	25.591	25.3393	-0.536			22.4029	2.555
25.206	30.774	25.218	27.441	25.318	16.069	25.3845	15.135		25.206	-7.478	25.218	17.878	25.318	25.342	25.3845	-0.75			22.4428	2.639
25.251	31.585	25.263	28.359	25.363	16.925	25.4296	14.375		25.251	1.157	25.263	22.519	25.363	23.521	25.4296	-0.925			22.4827	2.758
25.296	32.429	25.308	29.517	25.408	17.735	25.4748	13.536		25.296	11.476	25.308	26.704	25.408	20.182	25.4748	-0.931			22.5227	2.888
25.341	33.055	25.353	30.38	25.453	18.496	25.52	12.626		25.341	22.59	25.353	29.481	25.453	16.486	25.52	-0.823			22.5626	3.076
25.386	33.555	25.398	30.982	25.498	18.913	25.5651	11.657		25.386	33.5	25.398	30.446	25.498	13.567	25.5651	-0.797			22.6025	3.276
25.431	33.75	25.443	31.179	25.543	18.966	25.6103	10.697		25.431	43.245	25.443	30.046	25.543	11.884	25.6103	-0.912			22.6425	3.495
25.476	33.884	25.488	31.088	25.588	18.608	25.6555	9.764		25.476	51.312	25.488	28.591	25.588	11.315	25.6555	-0.997			22.6824	3.734
25.52	33.25	25.532	30.439	25.633	17.911	25.7006	8.824		25.52	57.192	25.532	27.954	25.633	11.064	25.7006	-0.968			22.7223	4.012
25.565	32.177	25.577	29.358	25.678	16.781	25.7458	7.908		25.565	62.258	25.577	29.674	25.678	11.078	25.7458	-0.771			22.7623	4.231
25.61	31.179	25.622	27.957	25.723	15.478	25.791	7.056		25.61	67.42	25.622	33.741	25.723	11.292	25.791	-0.363			22.8022	4.464
25.655	29.524	25.667	26.387	25.768	14.019	25.8362	6.285		25.655	72.836	25.667	39.1	25.768	11.425	25.8362	0.082			22.8421	4.673
25.7	27.74	25.712	24.806	25.813	12.548	25.8813	5.543		25.7	75.558	25.712	44.262	25.813	10.894	25.8813	0.277			22.8821	4.852
25.745	26.084	25.757	23.027	25.858	11.188	25.9265	4.875		25.745	71.714	25.757	47.178	25.858	9.43	25.9265	0.284			22.922	5.003
25.79	24.331	25.802	21.537	25.903	9.892	25.9717	4.301		25.79	61.658	25.802	46.141	25.903	7.294	25.9717	0.595			22.9619	5.087
25.834	22.642	25.847	20.038	25.948	8.729	26.0168	3.774		25.834	48.089	25.847	41.274	25.948	6.02	26.0168	1.344			23.0019	5.127
25.879	21.337	25.891	18.92	25.993	7.802	26.062	3.314		25.879	34.41	25.891	33.925	25.993	5.806	26.062	2.069			23.0418	5.09
25.924	20.169	25.936	17.939	26.038	7.003	26.1072	2.89		25.924	22.278	25.936	26.069	26.038	6.157	26.1072	2.273			23.0818	4.989
25.969	19.094	25.981	17.086	26.084	6.309	26.1523	2.522		25.969	11.206	25.981	18.516	26.084	6.368	26.1523	1.823			23.1217	4.867
26.014	18.127	26.026	16.577	26.129	5.769	26.1975	2.218		26.014	1.455	26.026	11.956	26.129	6.153	26.1975	0.847			23.1616	4.654
26.059	17.515	26.071	16.062	26.174	5.362	26.2427	1.952		26.059	-6.397	26.071	6.221	26.174	5.709	26.2427	-0.361			23.2016	4.431
26.104	17.194	26.116	15.673	26.219	5.091	26.2878	1.726		26.104	-12.791	26.116	1.473	26.219	5.203	26.2878	-1.501			23.2415	4.202
26.148	16.766	26.161	15.514	26.264	4.853	26.333	1.516		26.148	-17.573	26.161	-2.28	26.264	4.836	26.333	-2.35			23.2814	3.924
26.193	16.497	26.206	15.225	26.309	4.726	26.3782	1.338		26.193	-21.169	26.206	-4.825	26.309	4.582	26.3782	-2.816			23.3214	3.598
26.238	16.42	26.25	15.189	26.354	4.62	26.4233	1.187		26.238	-22.988	26.25	-6.374	26.354	4.464	26.4233	-2.917			23.3613	3.301
26.283	16.284	26.295	15.193	26.399	4.577	26.4685	1.046		26.283	-22.668	26.295	-6.796	26.399	4.424	26.4685	-2.727			23.4012	2.984
26.328	16.171	26.34	15.103	26.444	4.558	26.5137	0.933		26.328	-20.045	26.34	-6.164	26.444	4.388	26.5137	-2.354			23.4412	2.728
26.373	16.13	26.385	15.088	26.489	4.513	26.5588	0.826		26.373	-15.814	26.385	-4.704	26.489	4.374	26.5588	-1.915			23.4811	2.469
26.417	16.216	26.43	15.163	26.534	4.529	26.604	0.745		26.417	-10.776	26.43	-2.585	26.534	4.358	26.604	-1.502			23.521	2.263
26.462	16.241	26.475	15.097	26.579	4.548	26.6492	0.68		26.462	-5.626	26.475	0.117	26.579	4.357	26.6492	-1.149			23.561	2.08
26.507	16.077	26.52	14.964	26.624	4.523	26.6943	0.611		26.507	-0.805	26.52	3.146	26.624	4.34	26.6943	-0.869			23.6009	1.916
26.552	15.984	26.565	14.954	26.669	4.565	26.7395	0.544		26.552	3.376	26.565	5.979	26.669	4.354	26.7395	-0.688			23.6408	1.801
26.597	16.032	26.609	15.099	26.714	4.57	26.7847	0.499		26.597	6.281	26.609	8.28	26.714	4.38	26.7847	-0.577			23.6808	1.705
26.642	15.966	26.654	15.074	26.759	4.505	26.8299	0.447		26.642	8.231	26.654	10.128	26.759	4.403	26.8299	-0.489			23.7207	1.6
26.687	15.728	26.699	15.069	26.804	4.436	26.875	0.408		26.687	9.455	26.699	11.383	26.804	4.358	26.875	-0.44			23.7606	1.533
26.731	15.79	26.744	15.071	26.849	4.391	26.9202	0.38		26.731	10.29	26.744	12.064	26.849	4.32	26.9202	-0.455			23.8006	1.48
26.776	15.806	26.789	15.149	26.894	4.368	26.9654	0.355		26.776	10.576	26.789	12.457	26.894	4.315	26.9654	-0.475			23.8405	1.466
26.821	15.629	26.834	15.016	26.939	4.439	27.0105	0.336		26.821	10.788	26.834	12.735	26.939	4.268	27.0105	-0.5			23.8804	1.444
26.866	15.566	26.879	14.988	26.985	4.416	27.0557	0.319		26.866	10.89	26.879	13.003	26.985	4.194	27.0557	-0.555			23.9204	1.422
26.911	15.63	26.924	14.881	27.03	4.455	27.1009	0.314		26.911	10.905	26.924	12.937	27.03	4.113	27.1009	-0.62			23.9603	1.444
26.956	15.484	26.968	14.836	27.075	4.442	27.146	0.31		26.956	11.102	26.968	12.912	27.075	4.096	27.146	-0.691			24.0002	1.44
27.001	15.548	27.013	14.776	27.12	4.433	27.1912	0.306		27.001	11.136	27.013	13.034	27.12	4.062	27.1912	-0.75			24.0402	1.445
27.045	15.423	27.058	14.784	27.165	4.421	27.2364	0.317		27.045	11.179	27.058	12.998	27.165	4.053	27.2364	-0.801			24.0801	1.506
27.09	15.382	27.103	14.784	27.21	4.463	27.2815	0.316		27.09	11.277	27.103	12.942	27.21	4.038	27.2815	-0.866			24.12	1.56
27.135	15.438	27.148	14.827	27.255	4.393	27.3267	0.33		27.135	11.21	27.148	13.013	27.255	3.983	27.3267	-0.923			24.16	1.601
27.18	15.538	27.193	14.801	27.3	4.456	27.3719	0.33		27.18	11.399	27.193	13.099	27.3	3.935	27.3719	-0.995			24.1999	1.666
27.225	15.471	27.238	14.799	27.345	4.506	27.417	0.329		27.225	11.472	27.238	13.077	27.345	3.965	27.417	-1.069			24.2398	1.734
27.27	15.332	27.283	14.752	27.39	4.542	27.4622	0.35		27.27	11.482	27.283	13.078	27.39	3.957	27.4622	-1.106			24.2798	1.807
27.314	15.483	27.327	14.762	27.435	4.605	27.5074	0.365		27.314	11.696	27.327	13.183	27.435	3.865	27.5074	-1.177			24.3197	1.851
27.359	15.483	27.372	14.76	27.48	4.612	27.5525	0.379		27.359	11.961	27.372	13.307	27.48	3.79	27.5525	-1.229			24.3596	1.926
27.404	15.448	27.417	14.682	27.525	4.633	27.5977	0.407		27.404	12.076	27.417	13.24	27.525	3.731	27.5977	-1.289			24.3996	2.012
27.449	15.37	27.462	14.719	27.57	4.656	27.6429	0.471		27.449	12.237	27.462	13.413	27.57	3.739	27.6429	-1.348			24.4395	2.065
27.494	15.46	27.507	14.891	27.615	4.635	27.688	0.525		27.494	12.641	27.507	13.452	27.615	3.736	27.688	-1.415			24.4794	2.088
27.539	15.399	27.552	14.861	27.66	4.722	27.7332	0.616		27.539	12.781	27.552	13.592	27.66	3.749	27.7332	-1.471			24.5194	2.102
27.584	15.469	27.597	14.809	27.705	4.747	27.7784	0.72		27.584	13.133	27.597	13.61	27.705	3.766	27.7784	-1.528			24.5593	2.099
27.628	15.36	27.641	14.85	27.75	4.727	27.8236	0.852		27.628	13.291	27.641	13.934	27.75	3.741	27.8236	-1.591			24.5992	2.132
27.673	15.471	27.686	14.857	27.795	4.744	27.8687	1.003		27.673	13.561	27.686	14.057	27.795	3.823	27.8687	-1.645			24.6392	2.109
27.718	15.369	27.731	14.867	27.84	4.704	27.9139	1.185		27.718	13.745	27.731	14.167	27.84	3.892	27.9139	-1.676			24.6791	2.043
27.763	15.244	27.776	14.872	27.885	4.718	27.9591	1.403		27.763	14.056	27.776	14.361	27.885	3.942	27.9591	-1.684			24.719	2.027
27.808	15.415	27.821	14.936	27.931	4.735	28.0042	1.627		27.808	14.174	27.821	14.477	27.931	4.02	28.0042	-1.678			24.759	1.97
27.853	15.556	27.866	14.881	27.976	4.728	28.0494	1.844		27.853	14.505	27.866	14.653	27.976	4.036	28.0494	-1.655			24.7989	1.935
27.898	15.476	27.911	14.836	28.021	4.689	28.0946	2.078		27.898	15	27.911	14.966	28.021	4.05	28.0946	-1.601			24.8388	1.864
27.942	15.577	27.956	14.807	28.066	4.783	28.1397	2.317		27.942	15.257	27.956	15.065	28.066	4.099	28.1397	-1.486			24.8788	1.801
27.987	15.672	28	14.91	28.111	4.901	28.1849	2.53		27.987	15.54	28	15.046	28.111	4.146	28.1849	-1.367			24.9187	1.708
28.032	15.729	28.045	15.01	28.156	4.904	28.2301	2.719		28.032	15.784	28.045	15.245	28.156	4.269	28.2301	-1.256			24.9586	1.645
28.077	15.819	28.09	15.068	28.201	4.943	28.2752	2.898		28.077	16.316	28.09	15.359	28.201	4.383	28.2752	-1.099			24.9986	1.559
28.122	15.974	28.135	15.036	28.246	5.107	28.3204	3.019		28.122	16.854	28.135	15.494	28.246	4.439	28.3204	-0.88			25.0385	1.492
28.167	15.983	28.18	15.237	28.291	5.359	28.3656	3.126		28.167	17.06	28.18	15.749	28.291	4.51	28.3656	-0.572			25.0784	1.417
28.212	16.229	28.225	15.529	28.336	5.633	28.4107	3.188		28.212	17.532	28.225	16.082	28.336	4.543	28.4107	-0.137			25.1184	1.353
28.256	16.576	28.27	15.758	28.381	5.89	28.4559	3.199		28.256	18.203	28.27	16.304	28.381	4.616	28.4559	0.488			25.1583	1.308
28.301	16.859	28.315	15.993	28.426	6.097	28.5011	3.164		28.301	18.95	28.315	16.723	28.426	4.675	28.5011	1.447			25.1982	1.224
28.346	17.331	28.359	16.135	28.471	6.388	28.5462	3.109		28.346	19.804	28.359	17.12	28.471	4.774	28.5462	2.823			25.2382	1.201
28.391	17.794	28.404	16.499	28.516	6.702	28.5914	3.039		28.391	20.656	28.404	17.483	28.516	4.945	28.5914	4.6			25.2781	1.169
28.436	17.986	28.449	16.952	28.561	7.016	28.6366	2.913		28.436	21.575	28.449	17.943	28.561	5.155	28.6366	6.592			25.318	1.11
28.481	18.517	28.494	17.336	28.606	7.34	28.6817	2.755		28.481	22.562	28.494	18.545	28.606	5.384	28.6817	8.525			25.358	1.093
28.525	18.693	28.539	17.69	28.651	7.537	28.7269	2.611		28.525	23.536	28.539	19.035	28.651	5.775	28.7269	10.281			25.3979	1.055
28.57	19.016	28.584	17.973	28.696	7.578	28.7721	2.446		28.57	24.076	28.584	19.682	28.696	6.418	28.7721	11.82			25.4378	1.056
28.615	19.548	28.629	18.204	28.741	7.639	28.8172	2.27		28.615	22.902	28.629	20.297	28.741	7.494	28.8172	12.993			25.4778	1.034
28.66	19.545	28.674	18.535	28.786	7.661	28.8624	2.079		28.66	20.865	28.674	20.701	28.786	8.949	28.8624	13.752			25.5177	1.012
28.705	19.664	28.718	18.68	28.832	7.501	28.9076	1.908		28.705	19.772	28.718	20.784	28.832	10.807	28.9076	14.1			25.5576	0.991
28.75	19.468	28.763	18.585	28.877	7.327	28.9528	1.718		28.75	19.959	28.763	21.078	28.877	12.548	28.9528	14.322			25.5976	0.945
28.795	19.181	28.808	18.469	28.922	7.135	28.9979	1.546		28.795	20.902	28.808	21.749	28.922	13.606	28.9979	14.682			25.6375	0.921
28.839	19.024	28.853	18.274	28.967	6.825	29.0431	1.411		28.839	21.979	28.853	22.496	28.967	13.985	29.0431	15.212			25.6774	0.901
28.884	18.81	28.898	17.968	29.012	6.455	29.0883	1.286		28.884	23.233	28.898	23.136	29.012	14.169	29.0883	15.83			25.7174	0.912
28.929	18.347	28.943	17.62	29.057	6.174	29.1334	1.157		28.929	24.855	28.943	22.971	29.057	14.794	29.1334	16.389			25.7573	0.895
28.974	17.874	28.988	17.211	29.102	5.881	29.1786	1.033		28.974	26.786	28.988	22.814	29.102	15.733	29.1786	16.81			25.7973	0.881
29.019	17.652	29.033	16.897	29.147	5.655	29.2238	0.948		29.019	28.98	29.033	23.071	29.147	16.885	29.2238	17.087			25.8372	0.867
29.064	17.223	29.077	16.525	29.192	5.374	29.2689	0.868		29.064	30.928	29.077	24.46	29.192	18.114	29.2689	17.237			25.8771	0.868
29.109	17.059	29.122	16.244	29.237	5.216	29.3141	0.773		29.109	32.813	29.122	26.492	29.237	19.102	29.3141	17.298			25.9171	0.869
29.153	16.704	29.167	15.878	29.282	5.137	29.3593	0.696		29.153	34.42	29.167	28.679	29.282	19.783	29.3593	17.267			25.957	0.832
29.198	16.47	29.212	15.707	29.327	5.01	29.4044	0.634		29.198	35.542	29.212	30.459	29.327	20.136	29.4044	17.201			25.9969	0.801
29.243	16.034	29.257	15.514	29.372	4.934	29.4496	0.561		29.243	36.507	29.257	32.154	29.372	20.157	29.4496	17.156			26.0369	0.803
29.288	16.07	29.302	15.273	29.417	4.881	29.4948	0.515		29.288	37.009	29.302	33.339	29.417	19.719	29.4948	17.138			26.0768	0.803
29.333	15.882	29.347	15.138	29.462	4.783	29.5399	0.49		29.333	37.113	29.347	34.174	29.462	19.002	29.5399	17.132			26.1167	0.767
29.378	15.672	29.392	15.014	29.507	4.822	29.5851	0.451		29.378	36.769	29.392	34.471	29.507	18.069	29.5851	17.179			26.1567	0.776
29.423	15.744	29.436	15.135	29.552	4.865	29.6303	0.41		29.423	35.934	29.436	34.414	29.552	17.059	29.6303	17.228			26.1966	0.747
29.467	15.734	29.481	15.08	29.597	4.808	29.6754	0.369		29.467	35.009	29.481	33.969	29.597	16.081	29.6754	17.295			26.2365	0.72
29.512	15.635	29.526	15.053	29.642	4.821	29.7206	0.332		29.512	33.902	29.526	33.001	29.642	15.252	29.7206	17.32			26.2765	0.718
29.557	15.63	29.571	14.863	29.687	4.901	29.7658	0.295		29.557	32.601	29.571	31.647	29.687	14.744	29.7658	17.299			26.3164	0.717
29.602	15.531	29.616	14.843	29.733	4.874	29.8109	0.243		29.602	31.385	29.616	30.279	29.733	14.572	29.8109	17.204			26.3563	0.681
29.647	15.541	29.661	14.868	29.778	4.864	29.8561	0.193		29.647	30.527	29.661	28.91	29.778	14.778	29.8561	17.016			26.3963	0.72
29.692	15.596	29.706	14.913	29.823	4.867	29.9013	0.167		29.692	30.063	29.706	27.822	29.823	15.274	29.9013	16.713			26.4362	0.704
29.736	15.649	29.751	14.861	29.868	4.873	29.9465	0.123		29.736	30.021	29.751	26.905	29.868	16.069	29.9465	16.309			26.4761	0.685
29.781	15.671	29.795	14.887	29.913	4.825	29.9916	0.064		29.781	30.114	29.795	26.37	29.913	16.925	29.9916	15.774			26.5161	0.674
29.826	15.579	29.84	14.863	29.958	4.79	30.0368	0.03		29.826	30.774	29.84	26.463	29.958	17.735	30.0368	15.135			26.556	0.647
29.871	15.546	29.885	14.856	30.003	4.777	30.082	-0.013		29.871	31.585	29.885	26.857	30.003	18.496	30.082	14.375			26.5959	0.69
29.916	15.424	29.93	14.903	30.048	4.772	30.1271	-0.06		29.916	32.429	29.93	27.441	30.048	18.913	30.1271	13.536			26.6359	0.701
29.961	15.531	29.975	14.989	30.093	4.776	30.1723	-0.106		29.961	33.055	29.975	28.359	30.093	18.966	30.1723	12.626			26.6758	0.707
30.006	15.699	30.02	15.01	30.138	4.733	30.2175	-0.142		30.006	33.555	30.02	29.517	30.138	18.608	30.2175	11.657			26.7157	0.681
30.05	15.64	30.065	14.92	30.183	4.668	30.2626	-0.203		30.05	33.75	30.065	30.38	30.183	17.911	30.2626	10.697			26.7557	0.683
30.095	15.534	30.109	14.906	30.228	4.646	30.3078	-0.26		30.095	33.884	30.109	30.982	30.228	16.781	30.3078	9.764			26.7956	0.641
30.14	15.459	30.154	15.036	30.273	4.646	30.353	-0.301		30.14	33.25	30.154	31.179	30.273	15.478	30.353	8.824			26.8355	0.69
30.185	15.481	30.199	14.906	30.318	4.579	30.3981	-0.353		30.185	32.177	30.199	31.088	30.318	14.019	30.3981	7.908			26.8755	0.683
30.23	15.463	30.244	14.787	30.363	4.504	30.4433	-0.407		30.23	31.179	30.244	30.439	30.363	12.548	30.4433	7.056			26.9154	0.69
30.275	15.538	30.289	14.869	30.408	4.499	30.4885	-0.446		30.275	29.524	30.289	29.358	30.408	11.188	30.4885	6.285			26.9553	0.669
30.32	15.454	30.334	14.836	30.453	4.459	30.5336	-0.478		30.32	27.74	30.334	27.957	30.453	9.892	30.5336	5.543			26.9953	0.663
30.364	15.385	30.379	14.904	30.498	4.413	30.5788	-0.51		30.364	26.084	30.379	26.387	30.498	8.729	30.5788	4.875			27.0352	0.685
30.409	15.355	30.424	14.869	30.543	4.408	30.624	-0.534		30.409	24.331	30.424	24.806	30.543	7.802	30.624	4.301			27.0751	0.662
30.454	15.415	30.468	14.772	30.588	4.378	30.6691	-0.543		30.454	22.642	30.468	23.027	30.588	7.003	30.6691	3.774			27.1151	0.676
30.499	15.492	30.513	14.835	30.634	4.361	30.7143	-0.565		30.499	21.337	30.513	21.537	30.634	6.309	30.7143	3.314			27.155	0.673
30.544	15.449	30.558	14.877	30.679	4.33	30.7595	-0.555		30.544	20.169	30.558	20.038	30.679	5.769	30.7595	2.89			27.1949	0.649
30.589	15.523	30.603	14.791	30.724	4.269	30.8046	-0.556		30.589	19.094	30.603	18.92	30.724	5.362	30.8046	2.522			27.2349	0.65
30.633	15.453	30.648	14.771	30.769	4.236	30.8498	-0.542		30.633	18.127	30.648	17.939	30.769	5.091	30.8498	2.218			27.2748	0.656
30.678	15.357	30.693	14.788	30.814	4.19	30.895	-0.509		30.678	17.515	30.693	17.086	30.814	4.853	30.895	1.952			27.3147	0.628
30.723	15.417	30.738	14.862	30.859	4.132	30.9401	-0.481		30.723	17.194	30.738	16.577	30.859	4.726	30.9401	1.726			27.3547	0.635
30.768	15.639	30.783	14.899	30.904	4.142	30.9853	-0.453		30.768	16.766	30.783	16.062	30.904	4.62	30.9853	1.516			27.3946	0.629
30.813	15.517	30.827	14.839	30.949	4.123	31.0305	-0.437		30.813	16.497	30.827	15.673	30.949	4.577	31.0305	1.338			27.4345	0.627
30.858	15.575	30.872	14.889	30.994	4.11	31.0757	-0.399		30.858	16.42	30.872	15.514	30.994	4.558	31.0757	1.187			27.4745	0.617
30.903	15.493	30.917	14.877	31.039	4.032	31.1208	-0.351		30.903	16.284	30.917	15.225	31.039	4.513	31.1208	1.046			27.5144	0.624
30.947	15.332	30.962	14.767	31.084	4.082	31.166	-0.323		30.947	16.171	30.962	15.189	31.084	4.529	31.166	0.933			27.5543	0.635
30.992	15.433	31.007	14.749	31.129	4.116	31.2112	-0.279		30.992	16.13	31.007	15.193	31.129	4.548	31.2112	0.826			27.5943	0.62
31.037	15.583	31.052	14.703	31.174	4.153	31.2563	-0.259		31.037	16.216	31.052	15.103	31.174	4.523	31.2563	0.745			27.6342	0.63
31.082	15.504	31.097	14.721	31.219	4.158	31.3015	-0.227		31.082	16.241	31.097	15.088	31.219	4.565	31.3015	0.68			27.6741	0.628
31.127	15.578	31.142	14.881	31.264	4.177	31.3467	-0.187		31.127	16.077	31.142	15.163	31.264	4.57	31.3467	0.611			27.7141	0.584
31.172	15.567	31.186	14.916	31.309	4.2	31.3918	-0.153		31.172	15.984	31.186	15.097	31.309	4.505	31.3918	0.544			27.754	0.617
31.217	15.538	31.231	14.948	31.354	4.233	31.437	-0.11		31.217	16.032	31.231	14.964	31.354	4.436	31.437	0.499			27.7939	0.594
31.261	15.587	31.276	14.785	31.399	4.287	31.4822	-0.093		31.261	15.966	31.276	14.954	31.399	4.391	31.4822	0.447			27.8339	0.572
31.306	15.628	31.321	14.856	31.444	4.362	31.5273	-0.072		31.306	15.728	31.321	15.099	31.444	4.368	31.5273	0.408			27.8738	0.599
31.351	15.604	31.366	14.808	31.489	4.37	31.5725	-0.037		31.351	15.79	31.366	15.074	31.489	4.439	31.5725	0.38			27.9137	0.607
31.396	15.658	31.411	14.85	31.534	4.442	31.6177	-0.015		31.396	15.806	31.411	15.069	31.534	4.416	31.6177	0.355			27.9537	0.6
31.441	15.699	31.456	14.871	31.58	4.442	31.6628	0.009		31.441	15.629	31.456	15.071	31.58	4.455	31.6628	0.336			27.9936	0.586
31.486	15.626	31.501	14.965	31.625	4.415	31.708	0.017		31.486	15.566	31.501	15.149	31.625	4.442	31.708	0.319			28.0335	0.585
31.531	15.62	31.545	14.824	31.67	4.424	31.7532	0.037		31.531	15.63	31.545	15.016	31.67	4.433	31.7532	0.314			28.0735	0.588
31.575	15.739	31.59	14.854	31.715	4.425	31.7983	0.051		31.575	15.484	31.59	14.988	31.715	4.421	31.7983	0.31			28.1134	0.592
31.62	15.693	31.635	14.857	31.76	4.494	31.8435	0.07		31.62	15.548	31.635	14.881	31.76	4.463	31.8435	0.306			28.1533	0.624
31.665	15.649	31.68	14.854	31.805	4.507	31.8887	0.092		31.665	15.423	31.68	14.836	31.805	4.393	31.8887	0.317			28.1933	0.612
31.71	15.629	31.725	14.903	31.85	4.469	31.9338	0.099		31.71	15.382	31.725	14.776	31.85	4.456	31.9338	0.316			28.2332	0.6
31.755	15.605	31.77	14.96	31.895	4.548	31.979	0.106		31.755	15.438	31.77	14.784	31.895	4.506	31.979	0.33			28.2731	0.587
31.8	15.53	31.815	14.884	31.94	4.561	32.0242	0.117		31.8	15.538	31.815	14.784	31.94	4.542	32.0242	0.33			28.3131	0.593
31.844	15.581	31.86	14.984	31.985	4.591	32.0694	0.132		31.844	15.471	31.86	14.827	31.985	4.605	32.0694	0.329			28.353	0.601
31.889	15.612	31.904	14.869	32.03	4.639	32.1145	0.152		31.889	15.332	31.904	14.801	32.03	4.612	32.1145	0.35			28.3929	0.553
31.934	15.526	31.949	14.883	32.075	4.635	32.1597	0.15		31.934	15.483	31.949	14.799	32.075	4.633	32.1597	0.365			28.4329	0.581
31.979	15.615	31.994	14.922	32.12	4.627	32.2049	0.145		31.979	15.483	31.994	14.752	32.12	4.656	32.2049	0.379			28.4728	0.563
32.024	15.604	32.039	14.912	32.165	4.654	32.25	0.151		32.024	15.448	32.039	14.762	32.165	4.635	32.25	0.407			28.5128	0.549
32.069	15.582	32.084	14.994	32.21	4.623	32.2952	0.164		32.069	15.37	32.084	14.76	32.21	4.722	32.2952	0.471			28.5527	0.54
32.114	15.601	32.129	14.976	32.255	4.685	32.3404	0.168		32.114	15.46	32.129	14.682	32.255	4.747	32.3404	0.525			28.5926	0.549
32.158	15.688	32.174	14.976	32.3	4.732	32.3855	0.191		32.158	15.399	32.174	14.719	32.3	4.727	32.3855	0.616			28.6326	0.515
32.203	15.693	32.218	15.083	32.345	4.759	32.4307	0.209		32.203	15.469	32.218	14.891	32.345	4.744	32.4307	0.72			28.6725	0.53
32.248	15.733	32.263	14.973	32.39	4.71	32.4759	0.23		32.248	15.36	32.263	14.861	32.39	4.704	32.4759	0.852			28.7124	0.515
32.293	15.64	32.308	14.889	32.435	4.718	32.521	0.233		32.293	15.471	32.308	14.809	32.435	4.718	32.521	1.003			28.7524	0.528
32.338	15.755	32.353	14.898	32.481	4.813	32.5662	0.248		32.338	15.369	32.353	14.85	32.481	4.735	32.5662	1.185			28.7923	0.533
32.383	15.702	32.398	14.917	32.526	4.802	32.6114	0.275		32.383	15.244	32.398	14.857	32.526	4.728	32.6114	1.403			28.8322	0.516
32.428	15.576	32.443	15.009	32.571	4.793	32.6565	0.274		32.428	15.415	32.443	14.867	32.571	4.689	32.6565	1.627			28.8722	0.528
32.472	15.695	32.488	14.954	32.616	4.704	32.7017	0.278		32.472	15.556	32.488	14.872	32.616	4.783	32.7017	1.844			28.9121	0.509
32.517	15.727	32.533	15.076	32.661	4.725	32.7469	0.283		32.517	15.476	32.533	14.936	32.661	4.901	32.7469	2.078			28.952	0.542
32.562	15.691	32.577	15.035	32.706	4.752	32.792	0.293		32.562	15.577	32.577	14.881	32.706	4.904	32.792	2.317			28.992	0.538
32.607	15.651	32.622	15.068	32.751	4.74	32.8372	0.306		32.607	15.672	32.622	14.836	32.751	4.943	32.8372	2.53			29.0319	0.519
32.652	15.657	32.667	14.991	32.796	4.712	32.8824	0.282		32.652	15.729	32.667	14.807	32.796	5.107	32.8824	2.719			29.0718	0.501
32.697	15.588	32.712	14.916	32.841	4.67	32.9275	0.284		32.697	15.819	32.712	14.91	32.841	5.359	32.9275	2.898			29.1118	0.522
32.742	15.762	32.757	15.083	32.886	4.728	32.9727	0.266		32.742	15.974	32.757	15.01	32.886	5.633	32.9727	3.019			29.1517	0.504
32.786	15.712	32.802	15.095	32.931	4.745	33.0179	0.261		32.786	15.983	32.802	15.068	32.931	5.89	33.0179	3.126			29.1916	0.477
32.831	15.81	32.847	15.162	32.976	4.805	33.0631	0.26		32.831	16.229	32.847	15.036	32.976	6.097	33.0631	3.188			29.2316	0.468
32.876	15.808	32.892	15.1	33.021	4.813	33.1082	0.254		32.876	16.576	32.892	15.237	33.021	6.388	33.1082	3.199			29.2715	0.488
32.921	15.948	32.936	15.19	33.066	4.794	33.1534	0.236		32.921	16.859	32.936	15.529	33.066	6.702	33.1534	3.164			29.3114	0.483
32.966	15.93	32.981	15.158	33.111	4.805	33.1986	0.216		32.966	17.331	32.981	15.758	33.111	7.016	33.1986	3.109			29.3514	0.485
33.011	15.924	33.026	15.105	33.156	4.858	33.2437	0.205		33.011	17.794	33.026	15.993	33.156	7.34	33.2437	3.039			29.3913	0.483
33.055	15.811	33.071	15.083	33.201	4.842	33.2889	0.18		33.055	17.986	33.071	16.135	33.201	7.537	33.2889	2.913			29.4312	0.48
33.1	15.863	33.116	15.22	33.246	4.749	33.3341	0.138		33.1	18.517	33.116	16.499	33.246	7.578	33.3341	2.755			29.4712	0.45
33.145	15.852	33.161	15.23	33.291	4.846	33.3792	0.12		33.145	18.693	33.161	16.952	33.291	7.639	33.3792	2.611			29.5111	0.425
33.19	15.79	33.206	15.224	33.336	4.853	33.4244	0.107		33.19	19.016	33.206	17.336	33.336	7.661	33.4244	2.446			29.551	0.465
33.235	15.901	33.251	15.236	33.382	4.779	33.4696	0.09		33.235	19.548	33.251	17.69	33.382	7.501	33.4696	2.27			29.591	0.437
33.28	15.993	33.295	15.196	33.427	4.796	33.5147	0.078		33.28	19.545	33.295	17.973	33.427	7.327	33.5147	2.079			29.6309	0.441
33.325	15.808	33.34	15.165	33.472	4.838	33.5599	0.066		33.325	19.664	33.34	18.204	33.472	7.135	33.5599	1.908			29.6708	0.456
33.369	15.886	33.385	15.339	33.517	4.817	33.6051	0.054		33.369	19.468	33.385	18.535	33.517	6.825	33.6051	1.718			29.7108	0.459
33.414	15.784	33.43	15.342	33.562	4.773	33.6502	0.038		33.414	19.181	33.43	18.68	33.562	6.455	33.6502	1.546			29.7507	0.424
33.459	15.845	33.475	15.242	33.607	4.779	33.6954	0.036		33.459	19.024	33.475	18.585	33.607	6.174	33.6954	1.411			29.7906	0.43
33.504	15.75	33.52	15.258	33.652	4.752	33.7406	0.029		33.504	18.81	33.52	18.469	33.652	5.881	33.7406	1.286			29.8306	0.4
33.549	15.647	33.565	15.246	33.697	4.707	33.7857	0.039		33.549	18.347	33.565	18.274	33.697	5.655	33.7857	1.157			29.8705	0.428
33.594	15.719	33.61	15.186	33.742	4.635	33.8309	0.06		33.594	17.874	33.61	17.968	33.742	5.374	33.8309	1.033			29.9104	0.408
33.639	15.752	33.654	15.122	33.787	4.679	33.8761	0.094		33.639	17.652	33.654	17.62	33.787	5.216	33.8761	0.948			29.9504	0.401
33.683	15.733	33.699	15.205	33.832	4.631	33.9212	0.182		33.683	17.223	33.699	17.211	33.832	5.137	33.9212	0.868			29.9903	0.431
33.728	15.597	33.744	15.097	33.877	4.62	33.9664	0.31		33.728	17.059	33.744	16.897	33.877	5.01	33.9664	0.773			30.0302	0.442
33.773	15.699	33.789	15.007	33.922	4.622	34.0116	0.45		33.773	16.704	33.789	16.525	33.922	4.934	34.0116	0.696			30.0702	0.424
33.818	15.534	33.834	15.084	33.967	4.603	34.0567	0.616		33.818	16.47	33.834	16.244	33.967	4.881	34.0567	0.634			30.1101	0.431
33.863	15.566	33.879	15.03	34.012	4.525	34.1019	0.849		33.863	16.034	33.879	15.878	34.012	4.783	34.1019	0.561			30.15	0.441
33.908	15.524	33.924	14.968	34.057	4.59	34.1471	1.125		33.908	16.07	33.924	15.707	34.057	4.822	34.1471	0.515			30.19	0.46
33.952	15.421	33.969	14.994	34.102	4.652	34.1923	1.452		33.952	15.882	33.969	15.514	34.102	4.865	34.1923	0.49			30.2299	0.427
33.997	15.464	34.013	15.057	34.147	4.65	34.2374	1.837		33.997	15.672	34.013	15.273	34.147	4.808	34.2374	0.451			30.2698	0.421
34.042	15.306	34.058	14.99	34.192	4.619	34.2826	2.255		34.042	15.744	34.058	15.138	34.192	4.821	34.2826	0.41			30.3098	0.429
34.087	15.437	34.103	14.931	34.237	4.595	34.3278	2.698		34.087	15.734	34.103	15.014	34.237	4.901	34.3278	0.369			30.3497	0.408
34.132	15.416	34.148	14.879	34.282	4.614	34.3729	3.158		34.132	15.635	34.148	15.135	34.282	4.874	34.3729	0.332			30.3896	0.395
34.177	15.277	34.193	14.985	34.328	4.706	34.4181	3.63		34.177	15.63	34.193	15.08	34.328	4.864	34.4181	0.295			30.4296	0.403
34.222	15.55	34.238	14.923	34.373	4.785	34.4633	4.083		34.222	15.531	34.238	15.053	34.373	4.867	34.4633	0.243			30.4695	0.412
34.266	15.418	34.283	14.818	34.418	4.82	34.5084	4.548		34.266	15.541	34.283	14.863	34.418	4.873	34.5084	0.193			30.5094	0.397
34.311	15.5	34.328	14.854	34.463	4.888	34.5536	4.979		34.311	15.596	34.328	14.843	34.463	4.825	34.5536	0.167			30.5494	0.392
34.356	15.574	34.372	14.971	34.508	4.98	34.5988	5.363		34.356	15.649	34.372	14.868	34.508	4.79	34.5988	0.123			30.5893	0.405
34.401	15.695	34.417	14.92	34.553	5.046	34.6439	5.707		34.401	15.671	34.417	14.913	34.553	4.777	34.6439	0.064			30.6292	0.395
34.446	15.855	34.462	14.93	34.598	5.176	34.6891	5.958		34.446	15.579	34.462	14.861	34.598	4.772	34.6891	0.03			30.6692	0.404
34.491	16.107	34.507	15.028	34.643	5.384	34.7343	6.159		34.491	15.546	34.507	14.887	34.643	4.776	34.7343	-0.013			30.7091	0.405
34.536	16.286	34.552	14.987	34.688	5.539	34.7794	6.301		34.536	15.424	34.552	14.863	34.688	4.733	34.7794	-0.06			30.749	0.411
34.58	16.816	34.597	15.174	34.733	5.772	34.8246	6.393		34.58	15.531	34.597	14.856	34.733	4.668	34.8246	-0.106			30.789	0.42
34.625	17.222	34.642	15.302	34.778	6.083	34.8698	6.425		34.625	15.699	34.642	14.903	34.778	4.646	34.8698	-0.142			30.8289	0.39
34.67	17.728	34.686	15.477	34.823	6.413	34.9149	6.373		34.67	15.64	34.686	14.989	34.823	4.646	34.9149	-0.203			30.8688	0.388
34.715	18.26	34.731	15.781	34.868	6.819	34.9601	6.286		34.715	15.534	34.731	15.01	34.868	4.579	34.9601	-0.26			30.9088	0.404
34.76	18.942	34.776	16.022	34.913	7.344	35.0053	6.149		34.76	15.459	34.776	14.92	34.913	4.504	35.0053	-0.301			30.9487	0.389
34.805	19.565	34.821	16.337	34.958	7.846	35.0504	5.964		34.805	15.481	34.821	14.906	34.958	4.499	35.0504	-0.353			30.9886	0.405
34.85	20.287	34.866	16.666	35.003	8.425	35.0956	5.724		34.85	15.463	34.866	15.036	35.003	4.459	35.0956	-0.407			31.0286	0.389
34.894	21.006	34.911	17.191	35.048	8.966	35.1408	5.464		34.894	15.538	34.911	14.906	35.048	4.413	35.1408	-0.446			31.0685	0.408
34.939	21.642	34.956	17.603	35.093	9.427	35.186	5.18		34.939	15.454	34.956	14.787	35.093	4.408	35.186	-0.478			31.1084	0.405
34.984	22.375	35.001	18.167	35.138	9.89	35.2311	4.891		34.984	15.385	35.001	14.869	35.138	4.378	35.2311	-0.51			31.1484	0.434
35.029	22.934	35.045	18.873	35.183	10.347	35.2763	4.582		35.029	15.355	35.045	14.836	35.183	4.361	35.2763	-0.534			31.1883	0.418
35.074	23.407	35.09	19.488	35.229	10.606	35.3215	4.265		35.074	15.415	35.09	14.904	35.229	4.33	35.3215	-0.543			31.2283	0.409
35.119	23.469	35.135	20.121	35.274	10.786	35.3666	3.962		35.119	15.492	35.135	14.869	35.274	4.269	35.3666	-0.565			31.2682	0.389
35.163	23.588	35.18	20.645	35.319	10.811	35.4118	3.667		35.163	15.449	35.18	14.772	35.319	4.236	35.4118	-0.555			31.3081	0.432
35.208	23.509	35.225	21.118	35.364	10.719	35.457	3.378		35.208	15.523	35.225	14.835	35.364	4.19	35.457	-0.556			31.3481	0.418
35.253	23.477	35.27	21.573	35.409	10.54	35.5021	3.098		35.253	15.453	35.27	14.877	35.409	4.132	35.5021	-0.542			31.388	0.414
35.298	23.233	35.315	21.836	35.454	10.213	35.5473	2.842		35.298	15.357	35.315	14.791	35.454	4.142	35.5473	-0.509			31.4279	0.41
35.343	22.75	35.36	22.073	35.499	9.832	35.5925	2.594		35.343	15.417	35.36	14.771	35.499	4.123	35.5925	-0.481			31.4679	0.418
35.388	22.025	35.404	22.063	35.544	9.381	35.6376	2.375		35.388	15.639	35.404	14.788	35.544	4.11	35.6376	-0.453			31.5078	0.421
35.433	21.607	35.449	21.953	35.589	8.838	35.6828	2.16		35.433	15.517	35.449	14.862	35.589	4.032	35.6828	-0.437			31.5477	0.464
35.477	21.045	35.494	21.72	35.634	8.34	35.728	1.95		35.477	15.575	35.494	14.899	35.634	4.082	35.728	-0.399			31.5877	0.456
35.522	20.358	35.539	21.36	35.679	7.845	35.7731	1.774		35.522	15.493	35.539	14.839	35.679	4.116	35.7731	-0.351			31.6276	0.456
35.567	19.684	35.584	20.827	35.724	7.399	35.8183	1.611		35.567	15.332	35.584	14.889	35.724	4.153	35.8183	-0.323			31.6675	0.452
35.612	18.996	35.629	20.234	35.769	7.036	35.8635	1.448		35.612	15.433	35.629	14.877	35.769	4.158	35.8635	-0.279			31.7075	0.486
35.657	18.603	35.674	19.724	35.814	6.678	35.9086	1.289		35.657	15.583	35.674	14.767	35.814	4.177	35.9086	-0.259			31.7474	0.495
35.702	18.192	35.719	19.143	35.859	6.308	35.9538	1.13		35.702	15.504	35.719	14.749	35.859	4.2	35.9538	-0.227			31.7873	0.489
35.747	17.767	35.763	18.566	35.904	6.012	35.999	0.99		35.747	15.578	35.763	14.703	35.904	4.233	35.999	-0.187			31.8273	0.491
35.791	17.24	35.808	18.133	35.949	5.832	36.0441	0.866		35.791	15.567	35.808	14.721	35.949	4.287	36.0441	-0.153			31.8672	0.494
35.836	16.871	35.853	17.61	35.994	5.64	36.0893	0.759		35.836	15.538	35.853	14.881	35.994	4.362	36.0893	-0.11			31.9071	0.477
35.881	16.74	35.898	17.259	36.039	5.388	36.1345	0.672		35.881	15.587	35.898	14.916	36.039	4.37	36.1345	-0.093			31.9471	0.464
35.926	16.578	35.943	16.833	36.084	5.216	36.1796	0.562		35.926	15.628	35.943	14.948	36.084	4.442	36.1796	-0.072			31.987	0.489
35.971	16.472	35.988	16.595	36.13	5.167	36.2248	0.472		35.971	15.604	35.988	14.785	36.13	4.442	36.2248	-0.037			32.0269	0.484
36.016	16.258	36.033	16.316	36.175	5.122	36.27	0.379		36.016	15.658	36.033	14.856	36.175	4.415	36.27	-0.015			32.0669	0.492
36.061	16.152	36.078	16.119	36.22	5.037	36.3152	0.299		36.061	15.699	36.078	14.808	36.22	4.424	36.3152	0.009			32.1068	0.505
36.105	16.04	36.122	15.857	36.265	4.932	36.3603	0.234		36.105	15.626	36.122	14.85	36.265	4.425	36.3603	0.017			32.1467	0.499
36.15	15.831	36.167	15.729	36.31	4.926	36.4055	0.171		36.15	15.62	36.167	14.871	36.31	4.494	36.4055	0.037			32.1867	0.497
36.195	16.115	36.212	15.617	36.355	4.88	36.4507	0.127		36.195	15.739	36.212	14.965	36.355	4.507	36.4507	0.051			32.2266	0.51
36.24	15.995	36.257	15.526	36.4	4.91	36.4958	0.094		36.24	15.693	36.257	14.824	36.4	4.469	36.4958	0.07			32.2665	0.488
36.285	15.956	36.302	15.479	36.445	4.882	36.541	0.044		36.285	15.649	36.302	14.854	36.445	4.548	36.541	0.092			32.3065	0.489
36.33	16.086	36.347	15.424	36.49	4.816	36.5862	0.007		36.33	15.629	36.347	14.857	36.49	4.561	36.5862	0.099			32.3464	0.482
36.374	16.092	36.392	15.311	36.535	4.789	36.6313	-0.028		36.374	15.605	36.392	14.854	36.535	4.591	36.6313	0.106			32.3863	0.489
36.419	16.049	36.437	15.356	36.58	4.786	36.6765	-0.048		36.419	15.53	36.437	14.903	36.58	4.639	36.6765	0.117			32.4263	0.488
36.464	16.024	36.481	15.332	36.625	4.788	36.7217	-0.07		36.464	15.581	36.481	14.96	36.625	4.635	36.7217	0.132			32.4662	0.503
36.509	16.119	36.526	15.357	36.67	4.734	36.7668	-0.073		36.509	15.612	36.526	14.884	36.67	4.627	36.7668	0.152			32.5061	0.495
36.554	16.282	36.571	15.292	36.715	4.742	36.812	-0.063		36.554	15.526	36.571	14.984	36.715	4.654	36.812	0.15			32.5461	0.469
36.599	16.213	36.616	15.24	36.76	4.75	36.8572	-0.052		36.599	15.615	36.616	14.869	36.76	4.623	36.8572	0.145			32.586	0.474
36.644	16.152	36.661	15.328	36.805	4.738	36.9023	-0.055		36.644	15.604	36.661	14.883	36.805	4.685	36.9023	0.151			32.6259	0.466
36.688	16.268	36.706	15.419	36.85	4.774	36.9475	-0.049		36.688	15.582	36.706	14.922	36.85	4.732	36.9475	0.164			32.6659	0.48
36.733	16.096	36.751	15.408	36.895	4.749	36.9927	-0.046		36.733	15.601	36.751	14.912	36.895	4.759	36.9927	0.168			32.7058	0.478
36.778	16.071	36.795	15.419	36.94	4.797	37.0378	-0.042		36.778	15.688	36.795	14.994	36.94	4.71	37.0378	0.191			32.7457	0.465
36.823	16.206	36.84	15.421	36.985	4.801	37.083	-0.032		36.823	15.693	36.84	14.976	36.985	4.718	37.083	0.209			32.7857	0.47
36.868	16.323	36.885	15.448	37.03	4.72	37.1282	-0.01		36.868	15.733	36.885	14.976	37.03	4.813	37.1282	0.23			32.8256	0.482
36.913	16.124	36.93	15.348	37.076	4.788	37.1733	0.002		36.913	15.64	36.93	15.083	37.076	4.802	37.1733	0.233			32.8655	0.462
36.958	16.066	36.975	15.384	37.121	4.771	37.2185	0.009		36.958	15.755	36.975	14.973	37.121	4.793	37.2185	0.248			32.9055	0.46
37.002	16.208	37.02	15.397	37.166	4.729	37.2637	0.021		37.002	15.702	37.02	14.889	37.166	4.704	37.2637	0.275			32.9454	0.477
37.047	16.193	37.065	15.524	37.211	4.769	37.3089	0.024		37.047	15.576	37.065	14.898	37.211	4.725	37.3089	0.274			32.9853	0.485
37.092	16.125	37.11	15.415	37.256	4.78	37.354	0.044		37.092	15.695	37.11	14.917	37.256	4.752	37.354	0.278			33.0253	0.462
37.137	16.154	37.154	15.335	37.301	4.84	37.3992	0.059		37.137	15.727	37.154	15.009	37.301	4.74	37.3992	0.283			33.0652	0.456
37.182	16.124	37.199	15.315	37.346	4.802	37.4444	0.055		37.182	15.691	37.199	14.954	37.346	4.712	37.4444	0.293			33.1051	0.449
37.227	16.113	37.244	15.315	37.391	4.816	37.4895	0.093		37.227	15.651	37.244	15.076	37.391	4.67	37.4895	0.306			33.1451	0.442
37.271	16.046	37.289	15.266	37.436	4.805	37.5347			37.271	15.657	37.289	15.035	37.436	4.728	37.5347	0.282			33.185	0.475
37.316	16.106	37.334	15.337	37.481	4.824	37.5799			37.316	15.588	37.334	15.068	37.481	4.745	37.5799	0.284			33.2249	0.474
37.361	16.032	37.379	15.216	37.526	4.902	37.625			37.361	15.762	37.379	14.991	37.526	4.805	37.625	0.266			33.2649	0.485
37.406	16.05	37.424	15.185	37.571		37.6702			37.406	15.712	37.424	14.916	37.571	4.813	37.6702	0.261			33.3048	0.483
37.451	15.907	37.469	15.183	37.616		37.7154			37.451	15.81	37.469	15.083	37.616	4.794	37.7154	0.26			33.3447	0.483
37.496		37.513	15.207	37.661		37.7605			37.496	15.808	37.513	15.095	37.661	4.805	37.7605	0.254			33.3847	0.5
37.541		37.558		37.706		37.8057			37.541	15.948	37.558	15.162	37.706	4.858	37.8057	0.236			33.4246	0.503
37.585		37.603		37.751		37.8509			37.585	15.93	37.603	15.1	37.751	4.842	37.8509	0.216			33.4645	0.513
37.63		37.648		37.796		37.896			37.63	15.924	37.648	15.19	37.796	4.749	37.896	0.205			33.5045	0.52
37.675		37.693		37.841		37.9412			37.675	15.811	37.693	15.158	37.841	4.846	37.9412	0.18			33.5444	0.507
37.72		37.738		37.886		37.9864			37.72	15.863	37.738	15.105	37.886	4.853	37.9864	0.138			33.5843	0.496
37.765		37.783		37.931		38.0315			37.765	15.852	37.783	15.083	37.931	4.779	38.0315	0.12			33.6243	0.495
37.81		37.828		37.977		38.0767			37.81	15.79	37.828	15.22	37.977	4.796	38.0767	0.107			33.6642	0.51
37.855		37.872		38.022		38.1219			37.855	15.901	37.872	15.23	38.022	4.838	38.1219	0.09			33.7041	0.514
37.899		37.917		38.067		38.167			37.899	15.993	37.917	15.224	38.067	4.817	38.167	0.078			33.7441	0.487
37.944		37.962		38.112		38.2122			37.944	15.808	37.962	15.236	38.112	4.773	38.2122	0.066			33.784	0.504
37.989		38.007		38.157		38.2574			37.989	15.886	38.007	15.196	38.157	4.779	38.2574	0.054			33.8239	0.522
38.034		38.052		38.202		38.3026			38.034	15.784	38.052	15.165	38.202	4.752	38.3026	0.038			33.8639	0.538
38.079		38.097		38.247		38.3477			38.079	15.845	38.097	15.339	38.247	4.707	38.3477	0.036			33.9038	0.523
38.124		38.142		38.292		38.3929			38.124	15.75	38.142	15.342	38.292	4.635	38.3929	0.029			33.9438	0.526
38.169		38.187		38.337		38.4381			38.169	15.647	38.187	15.242	38.337	4.679	38.4381	0.039			33.9837	0.517
38.213		38.231		38.382		38.4832			38.213	15.719	38.231	15.258	38.382	4.631	38.4832	0.06			34.0236	0.547
38.258		38.276		38.427		38.5284			38.258	15.752	38.276	15.246	38.427	4.62	38.5284	0.094			34.0636	0.541
38.303		38.321		38.472		38.5736			38.303	15.733	38.321	15.186	38.472	4.622	38.5736	0.182			34.1035	0.552
38.348		38.366		38.517		38.6187			38.348	15.597	38.366	15.122	38.517	4.603	38.6187	0.31			34.1434	0.545
38.393		38.411		38.562		38.6639			38.393	15.699	38.411	15.205	38.562	4.525	38.6639	0.45			34.1834	0.527
38.438		38.456		38.607		38.7091			38.438	15.534	38.456	15.097	38.607	4.59	38.7091	0.616			34.2233	0.551
38.482		38.501		38.652		38.7542			38.482	15.566	38.501	15.007	38.652	4.652	38.7542	0.849			34.2632	0.548
38.527		38.546		38.697		38.7994			38.527	15.524	38.546	15.084	38.697	4.65	38.7994	1.125			34.3032	0.546
38.572		38.59		38.742		38.8446			38.572	15.421	38.59	15.03	38.742	4.619	38.8446	1.452			34.3431	0.529
38.617		38.635		38.787		38.8897			38.617	15.464	38.635	14.968	38.787	4.595	38.8897	1.837			34.383	0.528
38.662		38.68		38.832		38.9349			38.662	15.306	38.68	14.994	38.832	4.614	38.9349	2.255			34.423	0.528
38.707		38.725		38.878		38.9801			38.707	15.437	38.725	15.057	38.878	4.706	38.9801	2.698			34.4629	0.487
38.752		38.77		38.923		39.0252			38.752	15.416	38.77	14.99	38.923	4.785	39.0252	3.158			34.5028	0.516
38.796		38.815		38.968		39.0704			38.796	15.277	38.815	14.931	38.968	4.82	39.0704	3.63			34.5428	0.533
38.841		38.86		39.013		39.1156			38.841	15.55	38.86	14.879	39.013	4.888	39.1156	4.083			34.5827	0.541
38.886		38.905		39.058		39.1607			38.886	15.418	38.905	14.985	39.058	4.98	39.1607	4.548			34.6226	0.517
38.931		38.949		39.103		39.2059			38.931	15.5	38.949	14.923	39.103	5.046	39.2059	4.979			34.6626	0.495
38.976		38.994		39.148		39.2511			38.976	15.574	38.994	14.818	39.148	5.176	39.2511	5.363			34.7025	0.512
39.021		39.039		39.193		39.2962			39.021	15.695	39.039	14.854	39.193	5.384	39.2962	5.707			34.7424	0.495
39.066		39.084		39.238		39.3414			39.066	15.855	39.084	14.971	39.238	5.539	39.3414	5.958			34.7824	0.502
39.11		39.129		39.283		39.3866			39.11	16.107	39.129	14.92	39.283	5.772	39.3866	6.159			34.8223	0.483
39.155		39.174		39.328		39.4318			39.155	16.286	39.174	14.93	39.328	6.083	39.4318	6.301			34.8622	0.489
39.2		39.219		39.373		39.4769			39.2	16.816	39.219	15.028	39.373	6.413	39.4769	6.393			34.9022	0.476
39.245		39.263		39.418		39.5221			39.245	17.222	39.263	14.987	39.418	6.819	39.5221	6.425			34.9421	0.476
39.29		39.308		39.463		39.5673			39.29	17.728	39.308	15.174	39.463	7.344	39.5673	6.373			34.982	0.486
39.335		39.353		39.508		39.6124			39.335	18.26	39.353	15.302	39.508	7.846	39.6124	6.286			35.022	0.513
39.38		39.398		39.553		39.6576			39.38	18.942	39.398	15.477	39.553	8.425	39.6576	6.149			35.0619	0.497
39.424		39.443		39.598		39.7028			39.424	19.565	39.443	15.781	39.598	8.966	39.7028	5.964			35.1018	0.484
39.469		39.488		39.643		39.7479			39.469	20.287	39.488	16.022	39.643	9.427	39.7479	5.724			35.1418	0.479
39.514		39.533		39.688		39.7931			39.514	21.006	39.533	16.337	39.688	9.89	39.7931	5.464			35.1817	0.482
39.559		39.578		39.733		39.8383			39.559	21.642	39.578	16.666	39.733	10.347	39.8383	5.18			35.2216	0.473
39.604		39.622		39.779		39.8834			39.604	22.375	39.622	17.191	39.779	10.606	39.8834	4.891			35.2616	0.472
39.649		39.667		39.824		39.9286			39.649	22.934	39.667	17.603	39.824	10.786	39.9286	4.582			35.3015	0.458
39.693		39.712		39.869		39.9738			39.693	23.407	39.712	18.167	39.869	10.811	39.9738	4.265			35.3414	0.425
39.738		39.757		39.914		40.0189			39.738	23.469	39.757	18.873	39.914	10.719	40.0189	3.962			35.3814	0.437
39.783		39.802		39.959		40.0641			39.783	23.588	39.802	19.488	39.959	10.54	40.0641	3.667			35.4213	0.434
39.828		39.847		40.004		40.1093			39.828	23.509	39.847	20.121	40.004	10.213	40.1093	3.378			35.4612	0.446
39.873		39.892		40.049		40.1544			39.873	23.477	39.892	20.645	40.049	9.832	40.1544	3.098			35.5012	0.425
39.918		39.937		40.094		40.1996			39.918	23.233	39.937	21.118	40.094	9.381	40.1996	2.842			35.5411	0.426
39.963		39.981		40.139		40.2448			39.963	22.75	39.981	21.573	40.139	8.838	40.2448	2.594			35.581	0.432
40.007		40.026		40.184		40.2899			40.007	22.025	40.026	21.836	40.184	8.34	40.2899	2.375			35.621	0.432
40.052		40.071		40.229		40.3351			40.052	21.607	40.071	22.073	40.229	7.845	40.3351	2.16			35.6609	0.47
40.097		40.116		40.274		40.3803			40.097	21.045	40.116	22.063	40.274	7.399	40.3803	1.95			35.7008	0.466
40.142		40.161		40.319		40.4255			40.142	20.358	40.161	21.953	40.319	7.036	40.4255	1.774			35.7408	0.483
40.187		40.206		40.364		40.4706			40.187	19.684	40.206	21.72	40.364	6.678	40.4706	1.611			35.7807	0.467
40.232		40.251		40.409		40.5158			40.232	18.996	40.251	21.36	40.409	6.308	40.5158	1.448			35.8206	0.474
40.277		40.296		40.454		40.561			40.277	18.603	40.296	20.827	40.454	6.012	40.561	1.289			35.8606	0.465
40.321		40.34		40.499		40.6061			40.321	18.192	40.34	20.234	40.499	5.832	40.6061	1.13			35.9005	0.425
40.366		40.385		40.544		40.6513			40.366	17.767	40.385	19.724	40.544	5.64	40.6513	0.99			35.9404	0.466
40.411		40.43		40.589		40.6965			40.411	17.24	40.43	19.143	40.589	5.388	40.6965	0.866			35.9804	0.456
40.456		40.475		40.634		40.7416			40.456	16.871	40.475	18.566	40.634	5.216	40.7416	0.759			36.0203	0.478
40.501		40.52		40.679		40.7868			40.501	16.74	40.52	18.133	40.679	5.167	40.7868	0.672			36.0602	0.468
40.546		40.565		40.725		40.832			40.546	16.578	40.565	17.61	40.725	5.122	40.832	0.562			36.1002	0.47
40.59		40.61		40.77		40.8771			40.59	16.472	40.61	17.259	40.77	5.037	40.8771	0.472			36.1401	0.449
40.635		40.655		40.815		40.9223			40.635	16.258	40.655	16.833	40.815	4.932	40.9223	0.379			36.18	0.472
40.68		40.699		40.86		40.9675			40.68	16.152	40.699	16.595	40.86	4.926	40.9675	0.299			36.22	0.474
40.725		40.744		40.905		41.0126			40.725	16.04	40.744	16.316	40.905	4.88	41.0126	0.234			36.2599	0.46
40.77		40.789		40.95		41.0578			40.77	15.831	40.789	16.119	40.95	4.91	41.0578	0.171			36.2998	0.499
40.815		40.834		40.995		41.103			40.815	16.115	40.834	15.857	40.995	4.882	41.103	0.127			36.3398	0.505
40.86		40.879		41.04		41.1481			40.86	15.995	40.879	15.729	41.04	4.816	41.1481	0.094			36.3797	0.477
40.904		40.924		41.085		41.1933			40.904	15.956	40.924	15.617	41.085	4.789	41.1933	0.044			36.4196	0.51
40.949		40.969		41.13		41.2385			40.949	16.086	40.969	15.526	41.13	4.786	41.2385	0.007			36.4596	0.508
40.994		41.014		41.175		41.2836			40.994	16.092	41.014	15.479	41.175	4.788	41.2836	-0.028			36.4995	0.484
41.039		41.058		41.22		41.3288			41.039	16.049	41.058	15.424	41.22	4.734	41.3288	-0.048			36.5394	0.508
41.084		41.103		41.265		41.374			41.084	16.024	41.103	15.311	41.265	4.742	41.374	-0.07			36.5794	0.48
41.129		41.148		41.31		41.4191			41.129	16.119	41.148	15.356	41.31	4.75	41.4191	-0.073			36.6193	0.461
41.174		41.193		41.355		41.4643			41.174	16.282	41.193	15.332	41.355	4.738	41.4643	-0.063			36.6593	0.484
41.218		41.238		41.4		41.5095			41.218	16.213	41.238	15.357	41.4	4.774	41.5095	-0.052			36.6992	0.48
41.263		41.283		41.445		41.5547			41.263	16.152	41.283	15.292	41.445	4.749	41.5547	-0.055			36.7391	0.472
41.308		41.328		41.49		41.5998			41.308	16.268	41.328	15.24	41.49	4.797	41.5998	-0.049			36.7791	0.505
41.353		41.372		41.535		41.645			41.353	16.096	41.372	15.328	41.535	4.801	41.645	-0.046			36.819	0.48
41.398		41.417		41.58		41.6902			41.398	16.071	41.417	15.419	41.58	4.72	41.6902	-0.042			36.8589	0.479
41.443		41.462		41.626		41.7353			41.443	16.206	41.462	15.408	41.626	4.788	41.7353	-0.032			36.8989	0.482
41.488		41.507		41.671		41.7805			41.488	16.323	41.507	15.419	41.671	4.771	41.7805	-0.01			36.9388	0.505
41.532		41.552		41.716		41.8257			41.532	16.124	41.552	15.421	41.716	4.729	41.8257	0.002			36.9787	0.498
41.577		41.597		41.761		41.8708			41.577	16.066	41.597	15.448	41.761	4.769	41.8708	0.009			37.0187	0.515
41.622		41.642		41.806		41.916			41.622	16.208	41.642	15.348	41.806	4.78	41.916	0.021			37.0586	0.531
41.667		41.687		41.851		41.9612			41.667	16.193	41.687	15.384	41.851	4.84	41.9612	0.024			37.0985	0.499
41.712		41.731		41.896		42.0063			41.712	16.125	41.731	15.397	41.896	4.802	42.0063	0.044			37.1385	0.474
41.757		41.776		41.941		42.0515			41.757	16.154	41.776	15.524	41.941	4.816	42.0515	0.059			37.1784	0.511
41.801		41.821		41.986		42.0967			41.801	16.124	41.821	15.415	41.986	4.805	42.0967	0.055			37.2183	0.504
41.846		41.866		42.031		42.1418			41.846	16.113	41.866	15.335	42.031	4.824	42.1418	0.093			37.2583	0.491
41.891		41.911		42.076					41.891	16.046	41.911	15.315	42.076	4.902					37.2982	0.522
41.936		41.956							41.936	16.106	41.956	15.315							37.3381	0.504
41.981		42.001							41.981	16.032	42.001	15.266							37.3781	0.503
42.026		42.046							42.026	16.05	42.046	15.337							37.418	0.52
42.071		42.09							42.071	15.907	42.09	15.216							37.4579	0.504
		42.135									42.135	15.185							37.4979	0.521
		42.18									42.18	15.183							37.5378	0.532
		42.225									42.225	15.207							37.5777	0.502
																			37.6177	0.53
																			37.6576	0.541
																			37.6975	0.542
																			37.7375	0.488
																			37.7774	0.452
																			37.8173	0.478
																			37.8573	0.479

## Sheet: Figure 2 A
Figure 2—source data 1							GraphPad Michaelis-Menten Least squares fit
							Michaelis-Menten
Final Plot source data							Best-fit values
MinD 6µM + MinC [6 µM] activity [nmol/mg/min]							Vmax	8.296
ATP [mM]	Replicate 1	Replicate 2	Replicate 3				Km	0.09947
0	0	0	0				95% CI (profile likelihood)
0.05	2.58566	2.54574	1.9869				Vmax	8.008 to 8.592
0.1	4.47507	4.34201	4.46176				Km	0.08417 to 0.1170
0.2	5.99191	6.01853	5.63266				Goodness of Fit
0.5	7.01645	6.60397	6.68381				Degrees of Freedom	22
1	7.49546	7.08298	6.98984				R squared	0.9832
2	7.8414	7.66843	7.44224				Sum of Squares	3.027
5	8.52	8.61313	8.69297				Sy.x	0.3709
							Constraints
Plot Source Data after background substraction, normalization and conversion							Km	Km > 0
	MinD 6µM + MinC [6 µM] activity [nmol/mg/min]
ATP [mM]	Replicate 1	Replicate 2	Replicate 3	Average	StDev		Number of points
0	0	0	0	0	0		# of X values	24
0.05	2.58566	2.54574	1.9869	2.37277	0.273335		# Y values analyzed	24
0.1	4.47507	4.34201	4.46176	4.42628	0.0598332
0.2	5.99191	6.01853	5.63266	5.88103	0.175962
0.5	7.01645	6.60397	6.68381	6.76808	0.178625		Relative activity:
1	7.49546	7.08298	6.98984	7.18942	0.219712		MinD/MinD	% MinCD/MinD
2	7.8414	7.66843	7.44224	7.65069	0.163442		1	0.949608
5	8.52	8.61313	8.69297	8.6087	0.0706846
5 (Without MinC)	9.11875	9.01231		9.06553	0.0532196
Raw plate reader data
MinD [6 µM] + MinC [6µM] + ATP [0-5 µM] + Liposomes [0.2 mg/ml]
MinD Row 1
Time [s]	0	60	120	180	240	300.1	360.1	420.1	480.1	540.1	600.1	660.1	720.1	780.1	840.1	900.1	960.1	1020.1	1080.1	1140.1	1200.2	1260.2	1320.2	1380.2	1440.2	1500.2	1560.2	1620.2	1680.2	1740.2	1800.2	1860.2	1920.2	1980.2	2040.3	2100.3	2160.3	2220.3	2280.3	2340.3	2400.3	2460.3	2520.3	2580.3	2640.3	2700.3	2760.3	2820.3	2880.3
ATP [0 mM]	0.1634	0.1647	0.166	0.1651	0.1653	0.1641	0.1648	0.1657	0.1665	0.166	0.1661	0.1663	0.1662	0.1664	0.1669	0.1677	0.1681	0.17	0.1694	0.1679	0.1684	0.1685	0.1692	0.1687	0.1681	0.1672	0.1675	0.1668	0.1653	0.1666	0.1658	0.1659	0.1672	0.1667	0.1663	0.1665	0.1667	0.1655	0.1672	0.1661	0.1625	0.1627	0.1656	0.1616	0.1602	0.1642	0.1642	0.1639	0.1604
ATP [0.05 mM]	0.1848	0.1931	0.2009	0.2057	0.2079	0.2078	0.2084	0.2088	0.2098	0.2113	0.213	0.214	0.215	0.2161	0.2175	0.2188	0.2206	0.2213	0.2227	0.2246	0.2251	0.2267	0.2284	0.2292	0.2303	0.2318	0.2327	0.2336	0.2349	0.2356	0.2361	0.2372	0.2386	0.2387	0.2395	0.2403	0.2406	0.2411	0.2415	0.2418	0.2423	0.2429	0.2429	0.2436	0.2439	0.2442	0.2444	0.2449	0.2454
ATP [0.1 mM]	0.186	0.1916	0.1995	0.2077	0.2137	0.2177	0.2183	0.2188	0.2212	0.2209	0.2227	0.2245	0.2263	0.2286	0.2299	0.2318	0.2342	0.2365	0.2382	0.2403	0.2413	0.2439	0.2459	0.2477	0.2502	0.2522	0.2547	0.2568	0.2583	0.2609	0.2628	0.2644	0.2663	0.2684	0.2698	0.2713	0.2735	0.2755	0.2768	0.2783	0.2801	0.2818	0.2831	0.2847	0.2864	0.2874	0.2892	0.2911	0.2919
ATP [0.2 mM]	0.1947	0.194	0.1938	0.196	0.2059	0.2161	0.2233	0.2278	0.2303	0.2318	0.2322	0.2338	0.2359	0.2382	0.2406	0.2424	0.2441	0.2472	0.2488	0.2518	0.2541	0.2572	0.2599	0.2631	0.2656	0.2685	0.2714	0.2741	0.2766	0.2796	0.282	0.285	0.2873	0.2904	0.2929	0.2952	0.2988	0.301	0.3031	0.3064	0.3088	0.312	0.3138	0.3164	0.319	0.3206	0.323	0.3262	0.328
ATP [0.5 mM]	0.2423	0.2495	0.2537	0.2575	0.2609	0.2637	0.2677	0.2696	0.2717	0.2746	0.2755	0.2784	0.2794	0.2799	0.2834	0.2879	0.2894	0.2928	0.2955	0.2991	0.3007	0.3044	0.3068	0.3095	0.3134	0.3165	0.3199	0.3225	0.3255	0.3295	0.3351	0.338	0.3424	0.3448	0.3489	0.3514	0.3567	0.3599	0.3628	0.3668	0.3688	0.3722	0.3745	0.3779	0.3804	0.3843	0.3876	0.3902	0.3928
ATP [1 mM]	0.225	0.227	0.2289	0.2289	0.2321	0.2338	0.2405	0.2455	0.2484	0.2529	0.2548	0.2561	0.2603	0.2631	0.2662	0.2701	0.2738	0.2761	0.2784	0.2838	0.2875	0.2889	0.2926	0.2959	0.3013	0.3027	0.307	0.3108	0.3157	0.3186	0.3214	0.3263	0.3294	0.3313	0.3362	0.3399	0.3441	0.3475	0.3503	0.3542	0.3585	0.3608	0.3642	0.3682	0.3704	0.3723	0.3745	0.3785	0.3832
ATP [2 mM]	0.2432	0.2464	0.2515	0.2504	0.2535	0.2532	0.2554	0.2589	0.263	0.2665	0.2668	0.2707	0.2754	0.2824	0.2855	0.2905	0.2951	0.298	0.3015	0.304	0.3075	0.3118	0.3147	0.3186	0.3222	0.3267	0.3289	0.334	0.3377	0.3415	0.3453	0.3498	0.3532	0.357	0.3604	0.3647	0.3681	0.3714	0.3762	0.3779	0.3813	0.3859	0.3884	0.3915	0.3954	0.3981	0.3998	0.403	0.404
ATP [5 mM]	0.2719	0.2883	0.2888	0.2904	0.2938	0.2973	0.301	0.3052	0.31	0.3112	0.3165	0.3186	0.3212	0.3248	0.3289	0.3333	0.3372	0.3446	0.3511	0.3568	0.3646	0.3691	0.3713	0.375	0.3787	0.3816	0.3869	0.3902	0.3941	0.3973	0.4007	0.405	0.4066	0.4117	0.4139	0.4171	0.4194	0.4216	0.4237	0.4269	0.4294	0.4316	0.4322	0.4336	0.4344	0.4359	0.4365	0.4369	0.4366
5 mM, NO MinC 1	0.255	0.2607	0.2662	0.2727	0.2804	0.2861	0.2917	0.2986	0.3022	0.3091	0.3126	0.3158	0.3192	0.3241	0.3296	0.3366	0.343	0.3508	0.3565	0.3608	0.3669	0.3714	0.3763	0.38	0.3846	0.3904	0.3946	0.3995	0.4038	0.4076	0.4109	0.4152	0.4183	0.4216	0.4238	0.4272	0.4294	0.4306	0.4325	0.4349	0.4365	0.4377	0.4389	0.4401	0.4409	0.4416	0.442	0.4426	0.4426
MinD Row2
Time [s]	0	60	120	180	240	300.1	360.1	420.1	480.1	540.1	600.1	660.1	720.1	780.1	840.1	900.1	960.1	1020.1	1080.1	1140.1	1200.2	1260.2	1320.2	1380.2	1440.2	1500.2	1560.2	1620.2	1680.2	1740.2	1800.2	1860.2	1920.2	1980.2	2040.3	2100.3	2160.3	2220.3	2280.3	2340.3	2400.3	2460.3	2520.3	2580.3	2640.3	2700.3	2760.3	2820.3	2880.3
ATP [0 mM]	0.1666	0.1663	0.1655	0.1658	0.1655	0.1654	0.1657	0.1658	0.1654	0.1659	0.1662	0.1661	0.1661	0.1659	0.1656	0.1654	0.1653	0.165	0.1652	0.1653	0.1645	0.1644	0.1644	0.1644	0.1646	0.1644	0.1645	0.1645	0.1643	0.1644	0.1643	0.1641	0.1645	0.1645	0.1637	0.164	0.1639	0.164	0.1641	0.1637	0.1636	0.1637	0.1632	0.1636	0.1634	0.1629	0.1628	0.1629	0.1631
ATP [0.05 mM]	0.1989	0.2072	0.2151	0.2187	0.2216	0.223	0.2224	0.2231	0.2234	0.2247	0.2253	0.2267	0.2278	0.2291	0.2302	0.2315	0.2333	0.234	0.235	0.2359	0.2374	0.2389	0.2399	0.2408	0.2419	0.2436	0.2447	0.2453	0.2467	0.2476	0.2493	0.2498	0.2506	0.2507	0.2515	0.2523	0.2526	0.2535	0.2534	0.2534	0.2547	0.2546	0.255	0.2556	0.2557	0.257	0.2566	0.2569	0.2569
ATP [0.1 mM]	0.1867	0.1972	0.2075	0.214	0.2204	0.2231	0.2255	0.2264	0.2297	0.2308	0.2328	0.2335	0.2327	0.2337	0.2364	0.2379	0.2394	0.2418	0.2426	0.2441	0.2465	0.2481	0.2506	0.252	0.2539	0.256	0.2584	0.2599	0.2628	0.2644	0.266	0.2678	0.2696	0.2718	0.2735	0.2746	0.2764	0.2786	0.2803	0.2821	0.2832	0.2851	0.2863	0.2877	0.2896	0.2914	0.2923	0.2943	0.2952
ATP [0.2 mM]	0.1984	0.2001	0.2001	0.2012	0.2143	0.2237	0.2287	0.2344	0.2366	0.2384	0.2392	0.2406	0.2427	0.2448	0.2477	0.249	0.2513	0.2542	0.2554	0.2585	0.2615	0.2642	0.2669	0.2688	0.272	0.2748	0.2779	0.2805	0.2832	0.2865	0.2892	0.292	0.2946	0.2972	0.2996	0.3018	0.3042	0.3069	0.3096	0.3124	0.3152	0.3178	0.3203	0.323	0.3258	0.3278	0.3293	0.3326	0.3346
ATP [0.5 mM]	0.2235	0.2299	0.2336	0.2364	0.2391	0.2423	0.2435	0.2471	0.25	0.253	0.2558	0.2584	0.2605	0.2637	0.2662	0.268	0.2701	0.2703	0.2711	0.2745	0.2777	0.2814	0.2826	0.2846	0.2887	0.2909	0.2948	0.2975	0.3014	0.3052	0.3072	0.3112	0.3151	0.3173	0.3223	0.3258	0.3294	0.3324	0.3355	0.3391	0.3419	0.3446	0.3484	0.3517	0.3553	0.357	0.361	0.3642	0.367
ATP [1 mM]	0.2347	0.2389	0.2408	0.2442	0.2496	0.2542	0.2575	0.2587	0.2626	0.2654	0.268	0.2703	0.2713	0.2732	0.2752	0.277	0.2783	0.2804	0.2838	0.2875	0.2901	0.2935	0.2959	0.2999	0.3022	0.3059	0.3102	0.3127	0.3166	0.3206	0.3226	0.3264	0.3303	0.3336	0.3376	0.3412	0.3456	0.3483	0.3521	0.3546	0.3589	0.3621	0.3658	0.3684	0.3728	0.3767	0.3785	0.3822	0.3847
ATP [2 mM]	0.2489	0.256	0.2581	0.2593	0.2616	0.2632	0.2672	0.2733	0.2768	0.2828	0.2897	0.2915	0.2947	0.2976	0.3005	0.3023	0.3038	0.3076	0.3104	0.3145	0.3179	0.3222	0.325	0.3272	0.3311	0.3339	0.3385	0.3422	0.3463	0.3493	0.353	0.3566	0.3609	0.3646	0.368	0.373	0.3771	0.3797	0.3839	0.387	0.3918	0.3943	0.398	0.4004	0.4052	0.4088	0.4112	0.4143	0.4172
ATP [5 mM]	0.2891	0.2968	0.2992	0.3009	0.3007	0.3054	0.3087	0.3172	0.3176	0.3218	0.3254	0.3295	0.3325	0.3382	0.3392	0.3435	0.3473	0.3513	0.3584	0.3641	0.3709	0.3769	0.3798	0.3833	0.3871	0.3904	0.3942	0.3996	0.4029	0.4072	0.4101	0.414	0.4172	0.4197	0.424	0.4264	0.4299	0.4319	0.4358	0.4376	0.4419	0.4434	0.4448	0.4465	0.4483	0.4498	0.4511	0.453	0.4524
5 mM, NO MinC 2	0.2522	0.2587	0.2668	0.2735	0.2814	0.2878	0.2937	0.2995	0.3039	0.3082	0.3122	0.3158	0.3188	0.3251	0.3314	0.3388	0.3457	0.3513	0.3561	0.3615	0.3662	0.3707	0.3761	0.3808	0.3855	0.3899	0.3948	0.3991	0.4028	0.407	0.4107	0.414	0.4173	0.4204	0.4228	0.4255	0.4276	0.4297	0.4309	0.4325	0.4337	0.4342	0.4351	0.4363	0.4369	0.4368	0.4375	0.4379	0.4379
MinD Row 3
Time [s]	0	60	120	180	240	300.1	360.1	420.1	480.1	540.1	600.1	660.1	720.1	780.1	840.1	900.1	960.1	1020.1	1080.1	1140.1	1200.2	1260.2	1320.2	1380.2	1440.2	1500.2	1560.2	1620.2	1680.2	1740.2	1800.2	1860.2	1920.2	1980.2	2040.3	2100.3	2160.3	2220.3	2280.3	2340.3	2400.3	2460.3	2520.3	2580.3	2640.3	2700.3	2760.3	2820.3	2880.3
ATP [0 mM]	0.1639	0.1617	0.1607	0.1606	0.1606	0.1604	0.1601	0.1602	0.1602	0.16	0.1605	0.1602	0.1593	0.159	0.159	0.1591	0.1587	0.1586	0.1577	0.1583	0.1579	0.1576	0.1569	0.1577	0.1574	0.1572	0.157	0.1565	0.1567	0.1569	0.156	0.1562	0.1565	0.1563	0.1557	0.1554	0.1561	0.1559	0.1559	0.1555	0.1559	0.155	0.1552	0.1556	0.1545	0.155	0.1546	0.1546	0.1541
ATP [0.05 mM]	0.1874	0.1965	0.2024	0.2043	0.2056	0.207	0.207	0.2067	0.2067	0.2069	0.2081	0.2083	0.2088	0.2089	0.2096	0.2105	0.2113	0.2117	0.2129	0.2137	0.2146	0.216	0.2167	0.2174	0.2177	0.2186	0.22	0.2207	0.2211	0.2218	0.2226	0.2237	0.2239	0.2244	0.2246	0.225	0.2259	0.2265	0.2264	0.2263	0.2274	0.2269	0.2269	0.2274	0.2273	0.228	0.2278	0.2285	0.2282
ATP [0.1 mM]	0.1933	0.1972	0.2032	0.2106	0.2185	0.2221	0.2244	0.2255	0.2266	0.2281	0.229	0.2312	0.2314	0.2344	0.2353	0.2366	0.2397	0.2409	0.2421	0.245	0.2463	0.2482	0.2504	0.2522	0.2543	0.2575	0.259	0.2605	0.2627	0.2649	0.2673	0.2689	0.2703	0.2722	0.2743	0.2758	0.2776	0.2787	0.2802	0.2821	0.2838	0.2854	0.2868	0.2887	0.2902	0.2919	0.2934	0.2939	0.2965
ATP [0.2 mM]	0.1968	0.2004	0.1991	0.1983	0.2003	0.2028	0.2077	0.2141	0.2219	0.227	0.2291	0.2313	0.2338	0.2356	0.2372	0.2401	0.2425	0.245	0.2463	0.2489	0.2517	0.2545	0.2568	0.2592	0.2617	0.2649	0.2676	0.2695	0.2729	0.2755	0.2775	0.2801	0.2829	0.2852	0.2858	0.2908	0.2932	0.2952	0.2982	0.3006	0.3035	0.3054	0.3076	0.3105	0.3128	0.3149	0.3169	0.3195	0.3217
ATP [0.5 mM]	0.2239	0.228	0.2301	0.2314	0.2369	0.2388	0.2399	0.2409	0.243	0.2448	0.2455	0.2476	0.2498	0.2517	0.2537	0.2573	0.2603	0.2639	0.2659	0.2678	0.2708	0.2741	0.2763	0.2791	0.2839	0.2856	0.2913	0.293	0.2974	0.3002	0.3026	0.3061	0.3106	0.3127	0.3171	0.3198	0.3211	0.3258	0.3295	0.3318	0.3361	0.3387	0.3421	0.3448	0.3483	0.3495	0.3536	0.3566	0.3594
ATP [1 mM]	0.2269	0.2332	0.2371	0.2348	0.2384	0.2417	0.2481	0.2515	0.2556	0.2578	0.2597	0.2623	0.2632	0.2644	0.2683	0.2703	0.2726	0.276	0.2786	0.2825	0.2853	0.2881	0.2903	0.2946	0.298	0.3004	0.3042	0.3068	0.3107	0.3136	0.3174	0.3204	0.3243	0.3277	0.331	0.335	0.3384	0.3405	0.3448	0.3486	0.3523	0.3547	0.3585	0.3623	0.3658	0.3692	0.3716	0.376	0.3784
ATP [2 mM]	0.258	0.2596	0.2596	0.26	0.2631	0.2651	0.2658	0.269	0.2744	0.2782	0.2838	0.2884	0.2922	0.2954	0.2973	0.2993	0.3023	0.3057	0.3082	0.3129	0.3143	0.3179	0.3221	0.3243	0.3289	0.3318	0.3353	0.3391	0.3427	0.3467	0.3507	0.3534	0.3566	0.3607	0.3643	0.3688	0.3731	0.3767	0.38	0.384	0.3881	0.3905	0.3942	0.3977	0.4013	0.4051	0.4082	0.41	0.4135
ATP [5 mM]	0.3053	0.3136	0.3151	0.3179	0.3244	0.3279	0.3301	0.3312	0.3304	0.3328	0.3359	0.3395	0.3419	0.3445	0.3492	0.3539	0.3574	0.363	0.3692	0.3752	0.3804	0.3891	0.3922	0.3966	0.3994	0.4036	0.4076	0.413	0.4127	0.4197	0.4211	0.4247	0.4268	0.4311	0.4337	0.4364	0.4399	0.4428	0.4462	0.4476	0.4503	0.4526	0.4552	0.4571	0.4594	0.4612	0.463	0.4643	0.4633
Phosphate standard
Pi standard [µM]	Lane 4	Lane 5	Average
0	0.1485	0.1496	0.14905
2	0.1554	0.1552	0.1553
5	0.1631	0.1721	0.1676
10	0.1727	0.1815	0.1771
20	0.2088	0.2029	0.20585
50	0.2921	0.2888	0.29045
100	0.4137	0.4106	0.41215
150	0.5138	0.5045	0.50915
His-MinD MW	31690	g/mole (Daltons)
	0.003169	mg of MinD per µM in 100µl
[truncated: 72 more columns]

## Sheet: Figure 2 B Left
Figure 2—source data 2							GraphPad Michaelis-Menten Least squares fit
							Michaelis-Menten
Final Plot source data							Best-fit values
MinD 6µM + PDZ [5 µM] activity [nmol/mg/min]							Vmax	6.348
ATP [mM]	Replicate 1	Replicate 2	Replicate 3				Km	0.233
0	0	0	0				95% CI (profile likelihood)
0.05	0.586076	0.735279	0.599638				Vmax	5.905 to 6.818
0.1	1.35922	1.21002	1.61693				Km	0.1781 to 0.3034
0.2	2.82412	3.10896	3.40737				Goodness of Fit
0.5	4.64168	4.62811	4.46535				Degrees of Freedom	22
1	5.64541	5.94381	5.44195				R squared	0.9575
2	6.07945	6.05232	5.86243				Sum of Squares	5.153
5	5.29275	5.10285	5.52333				Sy.x	0.484
							Constraints
Plot Source Data after background substraction, normalization and conversion							Km	Km > 0
	MinD 6µM + PDZ [5 µM] activity [nmol/mg/min]
ATP [mM]	Replicate 1	Replicate 2	Replicate 3	Average	StDev		Number of points
0	0	0	0	0	0		# of X values	24
0.05	0.586076	0.735279	0.599638	0.640331	0.0673664		# Y values analyzed	24
0.1	1.35922	1.21002	1.61693	1.39539	0.16808
0.2	2.82412	3.10896	3.40737	3.11348	0.238133
0.5	4.64168	4.62811	4.46535	4.57838	0.0801175
1	5.64541	5.94381	5.44195	5.67705	0.206105
2	6.07945	6.05232	5.86243	5.99807	0.0965481
5	5.29275	5.10285	5.52333	5.30631	0.171928
NO PDZ control (5)	4.42466	4.19407		4.30936	0.115294
Raw plate reader data
MinD [6 µM] + PDZ [5µM] + ATP [0-5 µM] + Liposomes [0.2 mg/ml]
MinD Row 1
Time [s]	0	60	120	180	240	300.1	360.1	420.1	480.1	540.1	600.1	660.1	720.1	780.1	840.1	900.1	960.1	1020.1	1080.1	1140.1	1200.1	1260.2	1320.2	1380.2	1440.2	1500.2	1560.2	1620.2	1680.2	1740.2	1800.2	1860.2	1920.2	1980.2	2040.3	2100.2	2160.3	2220.3	2280.3	2340.3	2400.3	2460.3	2520.3	2580.3	2640.3	2700.3	2760.3	2820.3	2880.3
ATP [0 mM]	0.1802	0.1785	0.1777	0.1775	0.1782	0.1778	0.1775	0.1774	0.1781	0.1783	0.1781	0.1774	0.1783	0.1786	0.1782	0.1783	0.1785	0.1784	0.1781	0.1796	0.1789	0.1787	0.1788	0.1781	0.1788	0.1783	0.1781	0.1779	0.1784	0.1782	0.1784	0.1783	0.178	0.1783	0.178	0.1783	0.1778	0.1784	0.1775	0.1776	0.1778	0.1772	0.1776	0.1777	0.1774	0.1765	0.1766	0.1765	0.1759
ATP [0.05 mM]	0.163	0.1653	0.1673	0.1679	0.169	0.1695	0.1704	0.1707	0.1708	0.172	0.1714	0.1718	0.1727	0.1733	0.1728	0.1725	0.1731	0.173	0.1722	0.1736	0.1738	0.1733	0.1738	0.1732	0.1737	0.1731	0.1731	0.173	0.1731	0.1733	0.1733	0.1732	0.1735	0.1737	0.1734	0.1734	0.1733	0.1738	0.1729	0.1736	0.1733	0.1736	0.1731	0.1733	0.1733	0.1722	0.1728	0.1727	0.1724
ATP [0.1 mM]	0.1649	0.168	0.1721	0.1745	0.1771	0.1782	0.179	0.1808	0.1816	0.1831	0.1846	0.1851	0.1874	0.1888	0.1884	0.1895	0.191	0.1919	0.1922	0.1935	0.1944	0.1947	0.1956	0.1956	0.1969	0.1966	0.1967	0.1968	0.1979	0.1982	0.1989	0.1986	0.199	0.1994	0.2001	0.2006	0.2009	0.2011	0.2008	0.2013	0.2015	0.2024	0.2014	0.2019	0.2021	0.2021	0.202	0.2019	0.2024
ATP [0.2 mM]	0.17	0.1689	0.168	0.1693	0.1756	0.1801	0.1841	0.1863	0.1869	0.1902	0.1915	0.1923	0.1952	0.1965	0.1976	0.1999	0.2009	0.2027	0.2048	0.2063	0.2065	0.208	0.2103	0.2108	0.2124	0.2139	0.2148	0.2159	0.2172	0.2182	0.2193	0.2204	0.2213	0.2228	0.2237	0.2254	0.226	0.2263	0.2272	0.2282	0.2293	0.2305	0.2309	0.2318	0.2328	0.2322	0.2336	0.2347	0.2348
ATP [0.5 mM]	0.1941	0.1918	0.1918	0.1923	0.1933	0.1948	0.1958	0.1977	0.2011	0.2044	0.2056	0.2077	0.2106	0.2124	0.2147	0.2169	0.2193	0.2217	0.2229	0.2256	0.228	0.2299	0.2322	0.2339	0.2368	0.238	0.2396	0.2416	0.2433	0.2454	0.2478	0.2503	0.2524	0.2543	0.256	0.2575	0.2589	0.2599	0.2608	0.2612	0.2648	0.2672	0.268	0.2694	0.271	0.2715	0.2737	0.2759	0.2775
ATP [1 mM]	0.2042	0.2064	0.2066	0.2053	0.2064	0.2078	0.2092	0.2116	0.2135	0.2164	0.2191	0.2213	0.2246	0.2275	0.2297	0.2315	0.234	0.237	0.2388	0.2423	0.2452	0.2475	0.2508	0.2526	0.2552	0.2574	0.2599	0.2626	0.2651	0.2676	0.27	0.2726	0.2757	0.2776	0.2797	0.2825	0.2853	0.2871	0.289	0.2917	0.2942	0.2971	0.2986	0.3012	0.3041	0.3055	0.308	0.3103	0.3124
ATP [2 mM]	0.2244	0.2248	0.2263	0.2256	0.227	0.2266	0.2272	0.2287	0.2305	0.2356	0.2375	0.239	0.2421	0.2462	0.2476	0.2501	0.2533	0.2563	0.2583	0.2621	0.2651	0.267	0.2703	0.2726	0.2761	0.2784	0.2807	0.283	0.2861	0.2893	0.2925	0.2948	0.298	0.3003	0.3029	0.3065	0.3092	0.3119	0.3139	0.3171	0.3202	0.3233	0.3275	0.3318	0.335	0.3376	0.34	0.343	0.3441
ATP [5 mM]	0.2605	0.27	0.27	0.274	0.2748	0.2778	0.2819	0.2827	0.2863	0.2921	0.2963	0.2989	0.2995	0.3002	0.3035	0.3115	0.3149	0.3175	0.3171	0.3214	0.3226	0.3238	0.326	0.3281	0.3329	0.3345	0.3342	0.3393	0.3404	0.3434	0.3455	0.3444	0.3496	0.3533	0.3554	0.3571	0.3582	0.3604	0.3633	0.3658	0.368	0.3706	0.372	0.3738	0.376	0.3762	0.3786	0.3819	0.3836
NO PDZ1	0.2462	0.2492	0.2516	0.2558	0.2604	0.2634	0.2661	0.2687	0.2713	0.2743	0.2758	0.278	0.2803	0.2825	0.2841	0.2865	0.2877	0.2903	0.2922	0.2948	0.2973	0.2981	0.301	0.3021	0.3047	0.306	0.308	0.3095	0.312	0.3137	0.3158	0.3177	0.3196	0.322	0.3244	0.3261	0.3286	0.3308	0.3311	0.3336	0.3347	0.338	0.3386	0.3414	0.3429	0.3447	0.3454	0.3486	0.3498
MinD Row2
Time [s]	0	60	120	180	240	300.1	360.1	420.1	480.1	540.1	600.1	660.1	720.1	780.1	840.1	900.1	960.1	1020.1	1080.1	1140.1	1200.1	1260.2	1320.2	1380.2	1440.2	1500.2	1560.2	1620.2	1680.2	1740.2	1800.2	1860.2	1920.2	1980.2	2040.3	2100.2	2160.3	2220.3	2280.3	2340.3	2400.3	2460.3	2520.3	2580.3	2640.3	2700.3	2760.3	2820.3	2880.3
ATP [0 mM]	0.1718	0.1693	0.1677	0.1679	0.1677	0.1673	0.1671	0.1673	0.1676	0.1688	0.1687	0.1676	0.1688	0.1684	0.1677	0.1677	0.1685	0.1687	0.168	0.1688	0.1689	0.1689	0.1689	0.1683	0.1691	0.1691	0.1691	0.1693	0.1691	0.1692	0.1691	0.1694	0.1695	0.1693	0.1693	0.1695	0.1696	0.1696	0.1687	0.1692	0.1688	0.1693	0.1684	0.1684	0.1691	0.1685	0.1678	0.1677	0.1679
ATP [0.05 mM]	0.1645	0.1652	0.167	0.1686	0.1706	0.171	0.1716	0.1717	0.1734	0.1774	0.174	0.1744	0.1774	0.1783	0.1792	0.1799	0.1796	0.1799	0.1791	0.1802	0.1822	0.1811	0.1807	0.1795	0.1803	0.1802	0.1798	0.1798	0.1802	0.1807	0.1809	0.1804	0.181	0.1817	0.1818	0.182	0.182	0.1817	0.1809	0.1822	0.1818	0.1821	0.1815	0.1813	0.182	0.1813	0.1813	0.1815	0.1812
ATP [0.1 mM]	0.1689	0.1679	0.1698	0.1739	0.1775	0.1796	0.181	0.1815	0.1831	0.1846	0.1858	0.1865	0.1888	0.1897	0.1903	0.1911	0.1925	0.193	0.1936	0.1948	0.1957	0.1959	0.1966	0.1964	0.1975	0.1974	0.1979	0.1979	0.1985	0.1991	0.1998	0.199	0.1997	0.1997	0.2005	0.2007	0.2012	0.201	0.2012	0.2013	0.2015	0.2022	0.2013	0.2016	0.2022	0.2019	0.202	0.2023	0.2022
ATP [0.2 mM]	0.1745	0.1744	0.1729	0.1726	0.1767	0.1826	0.1874	0.1887	0.1911	0.193	0.1946	0.1963	0.1992	0.2008	0.2018	0.2034	0.2058	0.2071	0.209	0.2115	0.2132	0.2147	0.216	0.2168	0.2188	0.2198	0.2213	0.2224	0.2237	0.2243	0.2258	0.2266	0.2282	0.2291	0.2306	0.232	0.2332	0.2339	0.2343	0.2352	0.2366	0.2384	0.2375	0.2388	0.24	0.2398	0.241	0.2423	0.2425
ATP [0.5 mM]	0.1919	0.1916	0.1904	0.1897	0.1894	0.1907	0.1935	0.1949	0.196	0.1991	0.201	0.2028	0.2058	0.2086	0.2096	0.2113	0.214	0.2171	0.2197	0.2214	0.225	0.2262	0.2281	0.2297	0.2325	0.2341	0.2373	0.2387	0.2403	0.2428	0.2448	0.2461	0.2495	0.251	0.2527	0.2548	0.2574	0.2592	0.2607	0.2624	0.2644	0.2668	0.268	0.2697	0.2715	0.2724	0.2742	0.2763	0.2782
ATP [1 mM]	0.2005	0.2032	0.2039	0.2046	0.2074	0.2086	0.2097	0.2113	0.2129	0.2158	0.2176	0.22	0.2239	0.2263	0.2287	0.2317	0.2349	0.2371	0.2388	0.2421	0.245	0.2474	0.2504	0.2526	0.2568	0.2588	0.2615	0.2637	0.2674	0.2699	0.2723	0.2744	0.277	0.2798	0.2822	0.2855	0.2879	0.2908	0.2922	0.2947	0.2972	0.3006	0.3022	0.3048	0.3074	0.3096	0.312	0.3148	0.3166
ATP [2 mM]	0.2179	0.2194	0.2206	0.2212	0.2227	0.2234	0.2241	0.2243	0.2269	0.2312	0.2327	0.2348	0.2383	0.2417	0.2439	0.2461	0.2494	0.2524	0.2553	0.2582	0.2608	0.2633	0.2672	0.2691	0.2727	0.2747	0.2773	0.2804	0.2831	0.2859	0.289	0.2911	0.2944	0.2971	0.2998	0.303	0.3064	0.3084	0.3105	0.3129	0.3164	0.319	0.3215	0.324	0.3269	0.3294	0.3318	0.335	0.3367
ATP [5 mM]	0.259	0.2631	0.2675	0.2708	0.273	0.2755	0.2786	0.2835	0.2874	0.291	0.2913	0.2934	0.2984	0.3005	0.3034	0.3079	0.3126	0.3154	0.3178	0.319	0.3208	0.323	0.3255	0.3273	0.3301	0.3341	0.3358	0.3383	0.3405	0.3437	0.3456	0.3483	0.35	0.3526	0.3554	0.3579	0.3596	0.3622	0.364	0.3654	0.3685	0.3716	0.3742	0.3735	0.3761	0.3776	0.3795	0.3818	0.3836
NO PDZ2	0.2589	0.2622	0.2643	0.2669	0.2712	0.2734	0.2756	0.2773	0.2794	0.2808	0.2813	0.283	0.2851	0.2869	0.2879	0.2896	0.2916	0.294	0.2943	0.2985	0.2988	0.3009	0.3029	0.3039	0.3063	0.3078	0.3091	0.3108	0.3133	0.315	0.3168	0.3187	0.3207	0.3224	0.3235	0.3261	0.3275	0.3292	0.3305	0.3332	0.3347	0.3367	0.3381	0.3397	0.3421	0.3427	0.3446	0.3469	0.3487
MinD Row 3
Time [s]	0	60	120	180	240	300.1	360.1	420.1	480.1	540.1	600.1	660.1	720.1	780.1	840.1	900.1	960.1	1020.1	1080.1	1140.1	1200.1	1260.2	1320.2	1380.2	1440.2	1500.2	1560.2	1620.2	1680.2	1740.2	1800.2	1860.2	1920.2	1980.2	2040.3	2100.2	2160.3	2220.3	2280.3	2340.3	2400.3	2460.3	2520.3	2580.3	2640.3	2700.3	2760.3	2820.3	2880.3
ATP [0 mM]	0.1663	0.1689	0.1676	0.167	0.1677	0.1675	0.1673	0.1672	0.1678	0.1684	0.1677	0.1681	0.1677	0.1679	0.1681	0.1683	0.168	0.1684	0.1682	0.1688	0.169	0.1685	0.1689	0.1688	0.1697	0.1689	0.1691	0.1686	0.169	0.1695	0.1695	0.1696	0.1699	0.1698	0.1696	0.1697	0.17	0.1701	0.1695	0.1703	0.1695	0.1692	0.1692	0.1691	0.1699	0.1691	0.1691	0.1687	0.1684
ATP [0.05 mM]	0.1632	0.1661	0.1678	0.1697	0.1716	0.1724	0.173	0.1726	0.1747	0.1762	0.1758	0.1762	0.1772	0.1773	0.1777	0.178	0.1785	0.1791	0.1786	0.1797	0.18	0.18	0.1802	0.1798	0.1802	0.1801	0.1802	0.18	0.1802	0.1802	0.1808	0.1804	0.1806	0.1802	0.1806	0.1818	0.1815	0.1809	0.1806	0.1809	0.1806	0.1812	0.1803	0.1812	0.181	0.1805	0.1806	0.1806	0.1806
ATP [0.1 mM]	0.1682	0.1719	0.1745	0.1804	0.1867	0.1875	0.1893	0.1901	0.1922	0.1938	0.1948	0.197	0.1987	0.2005	0.2002	0.2014	0.2027	0.2045	0.2061	0.2074	0.2082	0.2091	0.2093	0.2099	0.2112	0.2112	0.2117	0.2114	0.2128	0.2139	0.2141	0.2147	0.2135	0.2152	0.2159	0.2158	0.2147	0.2169	0.2169	0.2178	0.2174	0.2183	0.2165	0.2181	0.2195	0.219	0.219	0.2184	0.219
ATP [0.2 mM]	0.1714	0.1709	0.1685	0.1695	0.1744	0.18	0.1852	0.1868	0.1882	0.1909	0.1924	0.194	0.1969	0.198	0.1997	0.2013	0.2036	0.2053	0.2063	0.209	0.2099	0.211	0.2132	0.2138	0.2167	0.2195	0.2214	0.2222	0.2239	0.225	0.2256	0.2268	0.2277	0.2286	0.2298	0.2307	0.2318	0.2331	0.2327	0.2339	0.2349	0.2364	0.2365	0.2369	0.2388	0.2386	0.2392	0.2403	0.2407
ATP [0.5 mM]	0.1898	0.19	0.1909	0.1914	0.1928	0.1922	0.1951	0.1979	0.1982	0.2014	0.2033	0.2052	0.2079	0.2105	0.2128	0.2145	0.2174	0.2197	0.2215	0.2247	0.2266	0.2274	0.2307	0.2319	0.2341	0.2361	0.2382	0.2401	0.2421	0.243	0.2452	0.2472	0.2496	0.2516	0.2535	0.2537	0.2563	0.2584	0.26	0.2618	0.264	0.266	0.2671	0.2695	0.2714	0.2724	0.2735	0.2754	0.2768
ATP [1 mM]	0.1971	0.1999	0.2015	0.2013	0.2032	0.2039	0.2056	0.2063	0.2084	0.2114	0.2143	0.2158	0.2196	0.2216	0.224	0.2269	0.2294	0.232	0.2344	0.2369	0.24	0.2421	0.2451	0.2472	0.2498	0.2522	0.2545	0.257	0.2594	0.2621	0.2644	0.2672	0.2703	0.2717	0.2744	0.2772	0.2801	0.2817	0.284	0.287	0.2891	0.2916	0.2931	0.2965	0.2988	0.3007	0.3023	0.3048	0.3066
ATP [2 mM]	0.213	0.2174	0.2183	0.2196	0.2213	0.223	0.2233	0.224	0.2267	0.2313	0.2316	0.2337	0.2369	0.2402	0.2426	0.2454	0.2483	0.2504	0.2532	0.2559	0.2586	0.2611	0.2646	0.2662	0.269	0.2716	0.274	0.2764	0.2797	0.2823	0.285	0.2872	0.2907	0.2936	0.2962	0.2995	0.3028	0.3046	0.3063	0.3088	0.3111	0.3145	0.3177	0.3198	0.3233	0.3253	0.3274	0.3308	0.3324
ATP [5 mM]	0.2589	0.2623	0.2661	0.2699	0.2736	0.2781	0.2835	0.2872	0.2913	0.2968	0.3005	0.3028	0.3064	0.3081	0.3108	0.3129	0.3166	0.32	0.3218	0.3254	0.3293	0.3306	0.334	0.3353	0.3385	0.3403	0.3435	0.3456	0.3473	0.35	0.3531	0.3552	0.3572	0.3597	0.3616	0.3648	0.3668	0.3687	0.3711	0.372	0.3759	0.3782	0.3799	0.3824	0.3851	0.3865	0.3888	0.3902	0.391
Phosphate standard
Pi standard [µM]	Lane 4	Lane 5	Average
0	0.1472	0.1569	0.15205
2	0.152	0.1486	0.1503
5	0.1644	0.1791	0.17175
10	0.1745	0.1754	0.17495
20	0.2034	0.2042	0.2038
50	0.2889	0.2949	0.2919
100	0.4073	0.405	0.40615
150	0.5126	0.4979	0.50525
His-MinD MW	31690	g/mole (Daltons)
	0.003169	mg of MinD per µM in 100µl
[truncated: 72 more columns]

## Sheet: Figure 2 B Right
Figure 2—source data 3
Final Plot source data
Sample	Mean (Relative activity)	SD
MinD [6 µM]	1	0.00847324
MinD [6 µM] + PDZ [1 µM]	1.25066	0.067512
MinD [6 µM] + PDZ [3 µM]	1.37349	0.125033
MinD [6 µM] + PDZ [5 µM]	1.2227	0.0279229
Plot Source Data after background substraction, normalization and conversion
		Mean (Relative activity)	StDev	%
5µM	1.22469
	1.25465
	1.18874	1.2227	0.0269448	122
3µM	1.37149
	1.52728
	1.2217	1.37349	0.124762	137
1µM	1.2966
	1.29959
	1.15579	1.25066	0.0670948	125
Plot Source Data
Well	ohne Auto	Steigung (µM/sek)	Average	nmol/min/mg	Average	StDev
A1	0.016625	0.0178375		5.62874
A2	0.0170613	0.0182738		5.76644
A3	0.0161014	0.0173139	0.0178084	5.46351	5.61956	0.123839
B1	0.0187631	0.0199756		6.30344
B2	0.0210321	0.0222446		7.01945
B3	0.0165813	0.0177938	0.0200047	5.61497	6.31262	0.573413
C1	0.0176722	0.0188847		5.95921
C2	0.0177158	0.0189284		5.97298
C3	0.0156214	0.0168339	0.0182157	5.31205	5.74808	0.308371
G6	0.0132651	0.0144776		4.56851
H6	0.0134396	0.0146521	0.0145649	4.62358	4.59604	0.0275371
Raw plate reader data
						A1-A3 5µM PDZ
						B1-B3 3µM PDZ
MinD [6 µM] + PDZ [5-1µM] + ATP [5 mM] + Liposomes [0.2 mg/ml]						C1-C3 1µM PDZ
						G6+H6 0µM PDZ
Time [s]	0	60	120	180	240.1	300.1	360.1	420.1	480.1	540.1	600.1	660.1	720.1	780.1	840.1	900.1	960.1	1020.1	1080.2	1140.2	1200.2	1260.2	1320.2	1380.2	1440.2	1500.2	1560.2	1620.2	1680.2	1740.2	1800.2	1860.2	1920.2	1980.3	2040.2	2100.3	2160.3	2220.3	2280.3	2340.3	2400.3	2460.3	2520.3	2580.3	2640.3	2700.3	2760.3	2820.3	2880.3
A1	0.2327	0.2486	0.2543	0.2608	0.2655	0.2705	0.2771	0.2811	0.285	0.2868	0.2949	0.2999	0.3013	0.3042	0.3025	0.306	0.3098	0.3137	0.3167	0.3215	0.3203	0.3284	0.3304	0.3323	0.3343	0.3365	0.3383	0.3407	0.3446	0.3443	0.3469	0.3496	0.3514	0.3548	0.3568	0.3589	0.362	0.3635	0.3666	0.3676	0.3695	0.3714	0.3744	0.3756	0.3803	0.3816	0.3831	0.3849	0.3872
A2	0.2252	0.2373	0.2451	0.2514	0.2558	0.2594	0.2642	0.2678	0.2724	0.2751	0.2789	0.2819	0.2835	0.2904	0.2913	0.2954	0.2976	0.3	0.3047	0.3092	0.3099	0.3162	0.3176	0.3201	0.3228	0.3244	0.3262	0.3297	0.3334	0.3341	0.3348	0.3378	0.3413	0.3438	0.3466	0.3497	0.3533	0.3517	0.3577	0.3579	0.3608	0.3633	0.3656	0.3676	0.3706	0.3721	0.374	0.3766	0.3788
A3	0.206	0.2168	0.2251	0.2367	0.2413	0.2424	0.2478	0.2525	0.2578	0.2604	0.2653	0.2684	0.2697	0.2754	0.2757	0.2793	0.2825	0.285	0.2896	0.2942	0.2931	0.2996	0.3017	0.3043	0.3071	0.3081	0.3104	0.3132	0.3158	0.3171	0.3201	0.3226	0.3249	0.3265	0.3291	0.3334	0.336	0.3368	0.3407	0.3409	0.3427	0.3454	0.348	0.3493	0.3536	0.3545	0.3565	0.3572	0.3602
B1	0.2129	0.2251	0.2344	0.2418	0.2476	0.2527	0.2596	0.2639	0.2683	0.2733	0.2764	0.28	0.2812	0.2858	0.2865	0.291	0.2944	0.2973	0.3001	0.3052	0.3055	0.3135	0.3147	0.3187	0.3212	0.3211	0.3242	0.3271	0.3315	0.3323	0.336	0.3388	0.3406	0.3431	0.3445	0.3485	0.3517	0.3521	0.3567	0.3578	0.3597	0.3619	0.3654	0.3663	0.3712	0.3725	0.3745	0.3764	0.379
B2	0.1974	0.2063	0.2118	0.2171	0.2204	0.2248	0.2296	0.233	0.2352	0.238	0.2407	0.2441	0.2451	0.2502	0.2522	0.2577	0.2626	0.2671	0.2704	0.2751	0.2742	0.2816	0.2836	0.2875	0.2902	0.2913	0.2942	0.299	0.3036	0.3036	0.3085	0.3114	0.3144	0.3186	0.3209	0.3261	0.3302	0.331	0.3355	0.337	0.339	0.3408	0.3453	0.3468	0.3524	0.3532	0.3559	0.3578	0.3613
B3	0.1472	0.1586	0.167	0.1727	0.1768	0.1823	0.1897	0.1954	0.2017	0.2062	0.2111	0.216	0.2179	0.2232	0.2256	0.2299	0.2343	0.2382	0.2427	0.248	0.247	0.2535	0.2549	0.2585	0.2614	0.2616	0.264	0.2666	0.2705	0.2707	0.2742	0.2767	0.2788	0.2807	0.2818	0.2853	0.2884	0.2877	0.2919	0.2923	0.2931	0.2945	0.2963	0.2967	0.301	0.2999	0.3003	0.3013	0.3024
C1	0.1989	0.2128	0.223	0.2326	0.2385	0.2453	0.2534	0.2583	0.2624	0.2665	0.2693	0.2726	0.2736	0.2785	0.2801	0.2832	0.2857	0.2885	0.2919	0.2963	0.2959	0.3023	0.3043	0.3072	0.3103	0.3112	0.3139	0.3169	0.3206	0.321	0.324	0.3278	0.33	0.3324	0.3342	0.3375	0.3412	0.3412	0.3456	0.3469	0.3486	0.3512	0.354	0.356	0.3606	0.3618	0.3638	0.3656	0.3682
C2	0.1885	0.1988	0.2068	0.2131	0.2165	0.2196	0.2248	0.228	0.2307	0.2338	0.2356	0.2375	0.2388	0.2436	0.2449	0.2483	0.2524	0.2556	0.2592	0.2639	0.2635	0.2679	0.2705	0.2732	0.2773	0.2778	0.2805	0.2836	0.2869	0.2879	0.2918	0.2952	0.2975	0.2998	0.3025	0.3067	0.3101	0.3109	0.3153	0.3166	0.319	0.3219	0.3244	0.3258	0.3314	0.3323	0.3338	0.3367	0.3394
C3	0.2028	0.2137	0.224	0.2322	0.2391	0.2445	0.2511	0.255	0.2589	0.2628	0.2654	0.2681	0.2694	0.2737	0.2747	0.2779	0.2797	0.2815	0.2846	0.2887	0.2881	0.2939	0.2965	0.2993	0.3016	0.3021	0.3042	0.3072	0.31	0.3108	0.3138	0.3161	0.3189	0.3204	0.3222	0.3257	0.3295	0.3297	0.3335	0.3342	0.3364	0.3388	0.3403	0.3427	0.3472	0.3479	0.3498	0.3522	0.3541
G6	0.2063	0.2198	0.2299	0.2368	0.2436	0.2491	0.256	0.2601	0.2632	0.267	0.2694	0.2725	0.2735	0.278	0.2784	0.2804	0.2837	0.2849	0.2871	0.2907	0.2896	0.2943	0.2963	0.2978	0.3002	0.3002	0.3021	0.3048	0.3084	0.3079	0.3108	0.3133	0.3151	0.3175	0.3185	0.3226	0.3254	0.3262	0.3293	0.3312	0.3324	0.3345	0.3402	0.3378	0.3426	0.3438	0.345	0.3477	0.3501
H6	0.2064	0.2207	0.2319	0.239	0.2482	0.253	0.2589	0.2616	0.2649	0.2684	0.2717	0.2742	0.2756	0.2795	0.278	0.2824	0.2871	0.2896	0.2903	0.2938	0.2927	0.2995	0.301	0.3037	0.3059	0.3045	0.3058	0.3101	0.3113	0.3108	0.3145	0.3176	0.3188	0.3211	0.323	0.3257	0.3291	0.3294	0.3332	0.3349	0.3366	0.3379	0.3399	0.3432	0.3489	0.3484	0.3486	0.3511	0.3532
Phosphate standard
Pi standard [µM]	Lane 4	Lane 5	Average
0	0.1339	0.1341	0.134
2	0.1471	0.148	0.14755
5	0.154	0.1679	0.16095
10	0.1721	0.1688	0.17045
20	0.1946	0.1948	0.1947
50	0.2934	0.311	0.3022
100	0.4014	0.4073	0.40435
150	0.5245	0.5111	0.5178
His-MinD MW	31690	g/mole (Daltons)
	0.003169	mg of MinD per µM in 100µl
[truncated: 72 more columns]

## Sheet: Figure 2—figure supplement 1
Figure 2—figure supplement 1—source data 1

[truncated: 22 more sheets: Figure 2—figure supplement 2, Figure 4 A + B, Figure 4 C, Figure 4—figure supplement 1, Figure 4—figure supplement 2, Figure 4—figure supplement 3, Figure 4—figure supplement 4, Figure 5 B, Figure 5 C, Figure 5 D, Figure 5 E, Figure 5—figure supplement 1 A, Figure 5—figure supplement 1 B, Figure 5—figure supplement 2 A, Figure 5—figure supplement 2 B, Table 1-1, Table 1-2, Table 1-3, Table 1-4, Table 1-5 …]
