# Supplementary material for: Membrane binding controls the ATPase cycle and localization of MinD in Bacillus subtilis
Source: eLife. 2026 Jun 8;13:RP101517. doi: 10.7554/eLife.101517 (PMC13246001; doi:10.7554/eLife.101517)
Supplement: Supplementary file 1. [file elife-101517-supp1.xlsx]

## Sheet: Tabelle1
Supplementary file 1: Oligonucleotides used in this study.
Oligo ID	Name	Sequence (5’ to 3’)
NA016	MinC-NdeI-F	GTCATCATATGGTGAAGACCAAAAAGCAG
NA017	MinC-XhoI-R	GTCATCTCGAGTCACATTCCTCCCTCAAG
NA018	MinD-NdeI-F	GTCATCATATGTTGGGTGAGGCTATCGTA
NA019	MinD-XhoI-R	GTCATCTCGAGTTAAGATCTTACTCCGAA
HF0245	GC-1-pUC18toMinC-F	GCCTGCAGGTCGACTCTAGAGGATCCCCGGAACAAAGAATGGACTAACATTG
HF0246	GC-1-MinCtoSpec-R	ACATCCTTTCACCCTTCACATTCCTCCCTCAAG
HF0247	GC-2-MinCtoSpec-Halo-F	GGGAGGAATGTGAAGGGTGAAAGGATGTACTTAAAC
HF0248	GC-2-Spec-HalotoMinD-R	ATAGCCTCACCCAACCCATTGGAAATCTCCAGAG
HF0249	GC-3-HalotoMinD+Down-F	AGATTTCCAATGGGTTGGGTGAGGCTATCGTAATAAC
HF0250	GC-3-MinDDowntopUC18-R	CATGATTACGAATTCGAGCTCGGTACCCGCCTACTTCAATCTGCTGTTC
HF0213	MinD-G12V-QC-F	TCGGGAAAAGtCGGAGTAGGT
HF0214	MinD-G12V-QC-R	AGTTATTACGATAGCCTCAC
HF0215	MinD-K16A-QC-F	CGGAGTAGGTgcGACAACAACATC
HF0216	MinD-K16A-QC-R	CCTTTTCCCGAAGTTATTAC
HF0237	MinD-I260E-QC-F	GATGGCTAAGgaaAAGTCATTTTTCGG
HF0238	MinD-I260E-QC-R	ATTCCTTTGTTTTGCTCTTC
HF0239	MinD-D40A-QC-F	AGTAGATACTgcgATAGGACTGC
HF0240	MinD-D40A-QC-R	AAGCATACGCGCTTC
HF0255	MinJ-PDZ-28a-BamHI-F	CATGGATCCTTGGAGGTCTTGTTCCAGGGACCGCGTATTTTTCTG
HF0256	MinJ-PDZ-28a-XhoI-R	CGCCTCGAGTTATTATGATCCCGAAGCGAC
