# Supplementary material for: Membrane binding controls the ATPase cycle and localization of MinD in Bacillus subtilis
Source: eLife. 2026 Jun 8;13:RP101517. doi: 10.7554/eLife.101517 (PMC13246001; doi:10.7554/eLife.101517)
Supplement: Supplementary file 2. [file elife-101517-supp2.xlsx]

## Sheet: Tabelle1
Supplementary file 2: Plasmids used in this study.
Plasmid	Characteristic	Reference/Source
pUC18	lacZα, pMB1 ori, bla (ApR)	Norrander et al., 1983. DOI: 10.1016/0378-1119(83)90040-9
pET-28a (+)	kanR, T7lac, f1 ori, N-term His-tag/thrombin/T7-Tag	Novagen
NAP012	pET-28a-minC	This paper
NAP013	pET-28a-minD	This paper
EHF045	pET-28a-minD-G12V	This paper
EHF046	pET-28a-minD-K16A	This paper
EHF047	pET-28a-minD-I260E	This paper
EHF052	pET-28a-minD-D40A	This paper
CD001	pET-28a-PDZ	This paper
EHF042	pUC18mut-minDNUp-aad9-Halo-minD	Laboratory stock
EHF054	pUC18-minC-aad9-haloTag-minD-minDdown	This paper
EHF055	pUC18-minC-aad9-haloTag-minD-G12V-minDdown	This paper
EHF056	pUC18-minC-aad9-haloTag-minD-K16A-minDdown	This paper
EHF057	pUC18-minC-aad9-haloTag-minD-D40A-minDdown	This paper
EHF058	pUC18-minC-aad9-haloTag-minD-I260E-minDdown	This paper
