# Supplementary material for: Membrane binding controls the ATPase cycle and localization of MinD in Bacillus subtilis
Source: eLife. 2026 Jun 8;13:RP101517. doi: 10.7554/eLife.101517 (PMC13246001; doi:10.7554/eLife.101517)
Supplement: Supplementary file 3. [file elife-101517-supp3.xlsx]

## Sheet: Tabelle1
Supplementary file 3: Strains used in this study.
Strain	Relevant features/genotype	Reference/Source	Transformation
B. subtilis
168	trpC2	Laboratory collection
BKK28000	minC::lox71-kanR-lox66	Addgene (B. subtilis BKK Library, Kan), Koo et al. 2017, DOI: 10.1016/j.cels.2016.12.013
RD021	minJ::tet	Bramkamp et al., 2008, DOI: 10.1111/j.1365-2958.2008.06501.x
BKK27990	minD::lox71-kanR-lox66	Addgene (B. subtilis BKK Library, Kan); Koo et al. 2017, DOI: 10.1016/j.cels.2016.12.013
BHF077	minD::lox71-kanR-lox66	This study	BKK27990 gDNA -> 168
BHF078	minD::aad9-Halo-minD	This study	EHF054 -> BHF077
BHF079	minD::aad9-Halo-minD-G12V	This study	EHF055 -> BHF077
BHF080	minD::aad9-Halo-minD-K16A	This study	EHF056 -> BHF077
BHF081	minD::aad9-Halo-minD-D40A	This study	EHF057 -> BHF077
BHF082	minD::aad9-Halo-minD-I260E	This study	EHF058 -> BHF077
BHF083	minD::aad9-Halo-minD, minC::lox71-kanR-lox66	This study	BKK28000 gDNA-> BHF078
BHF084	minD::aad9-Halo-minD, minJ::tet	This study	RD021 gDNA -> BHF078
E. coli
NEB 5-alpha	fhuA2Δ(argF-lacZ)U169 phoA glnV44 Φ80Δ(lacZ)M15 gyrA96 recA1 relA1 endA1 thi-1 hsdR17	New England Biolabs
BL21(DE3)pLysS	F–, ompT, hsdSB (rB–, mB–), dcm, gal, λ(DE3), pLysS, Cmr	Promega
