# Supplementary material for: Membrane binding controls the ATPase cycle and localization of MinD in Bacillus subtilis
Source: eLife. 2026 Jun 8;13:RP101517. doi: 10.7554/eLife.101517 (PMC13246001; doi:10.7554/eLife.101517)
Supplement: Supplementary file 4. [file elife-101517-supp4.xlsx]

## Sheet: Tabelle1
Supplementary file 4: BLI Advanced Kinetics Protocol.
Step type	Sample type	Position	Duration [s]
1. Initial baseline	Buffer	Tube	30
2. Loading of the bait	Biotinylated liposomes	Tube	90
3. Baseline	Buffer	Tube	30
4. Association	Analyte (His-MinD*)	Tube	120
5. Dissociation	Buffer	Tube	120
*His-MinD or variant
