# Supplementary figures and images for: Mechanistic Insights into MinD Regulation and Pattern Formation in Bacillus subtilis
Source: eLife journal article supplement (doi:10.7554/elife.101517), 2024-09-11

Figure 2—figure supplement 1—source data 1

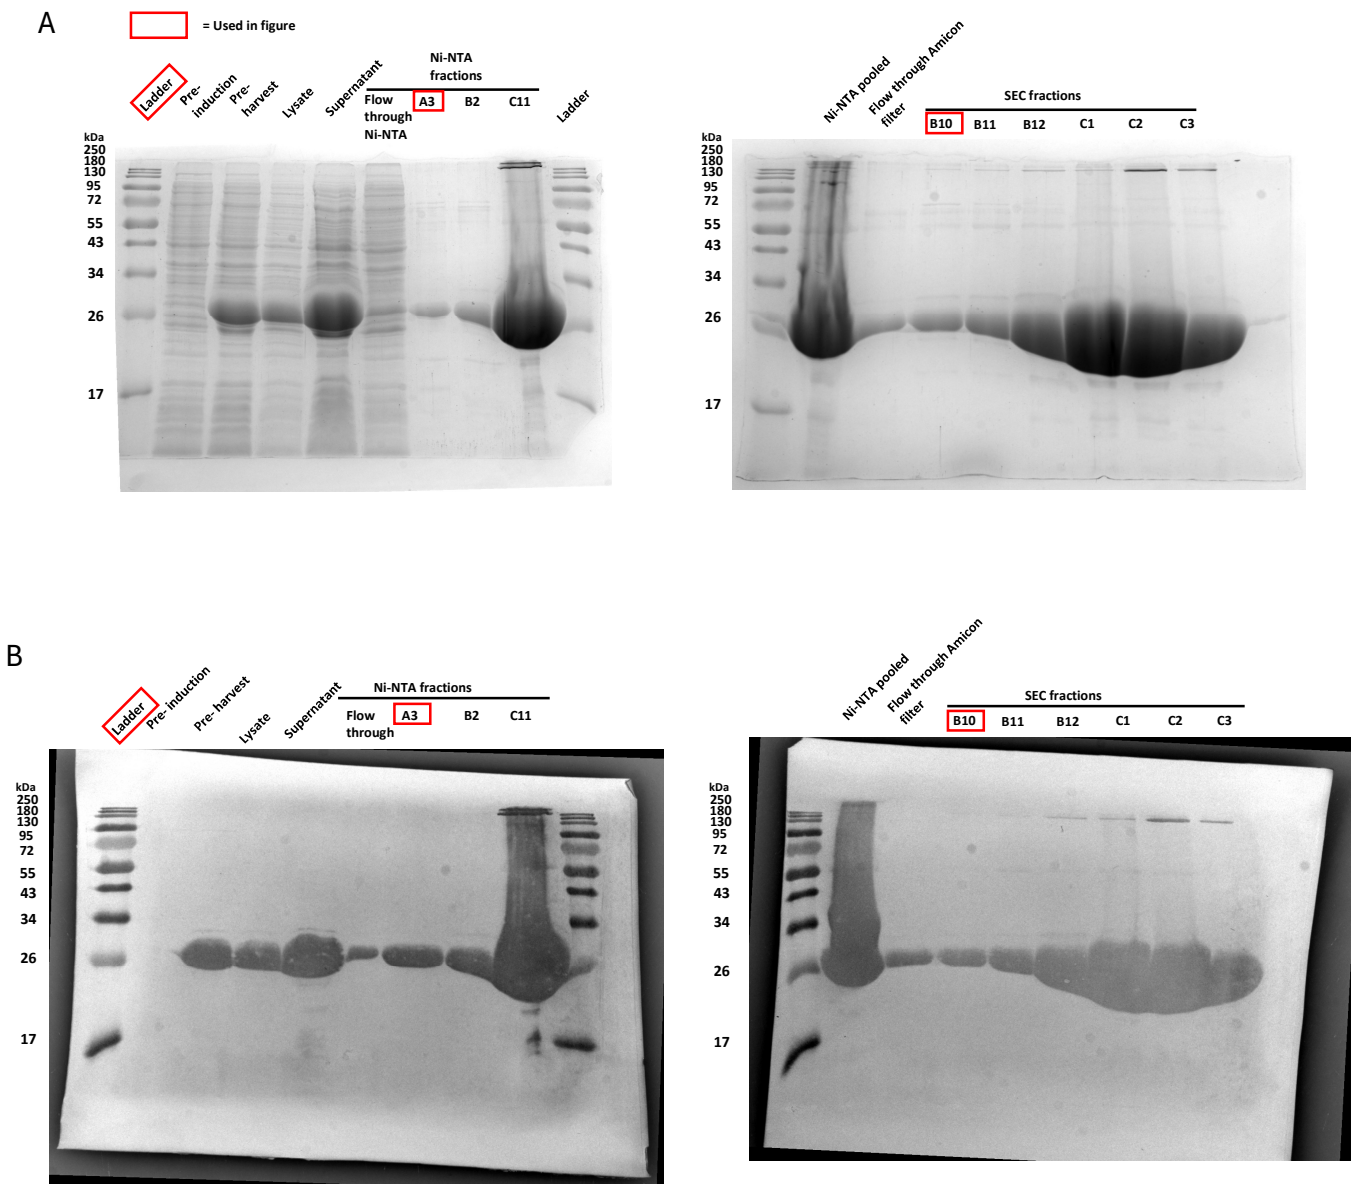

Supplement: fig2-figsupp1-data2 [file Figure 2–figure supplement 1-source data 1.pdf › Figure 2–figure supplement 1-source data 1.pdf]

Figure 2—figure supplement 2—source data 1

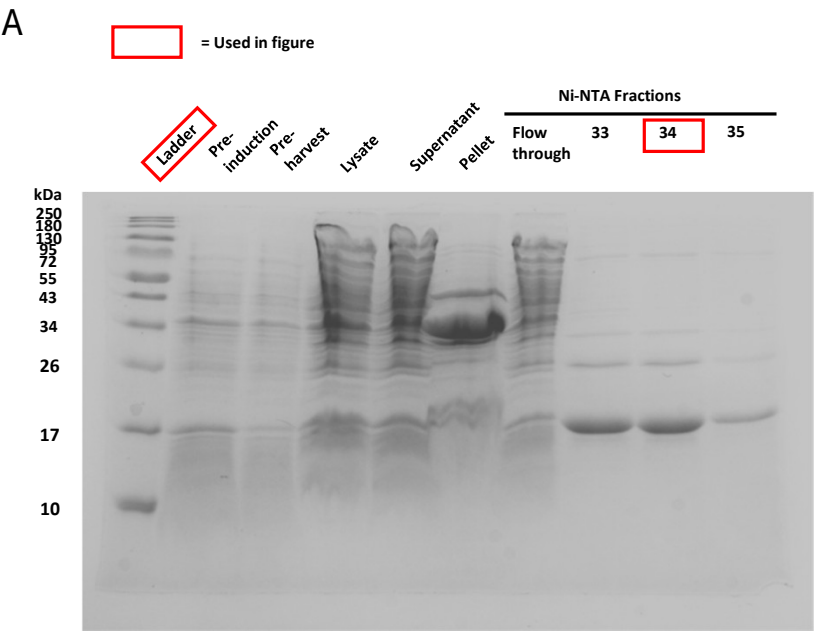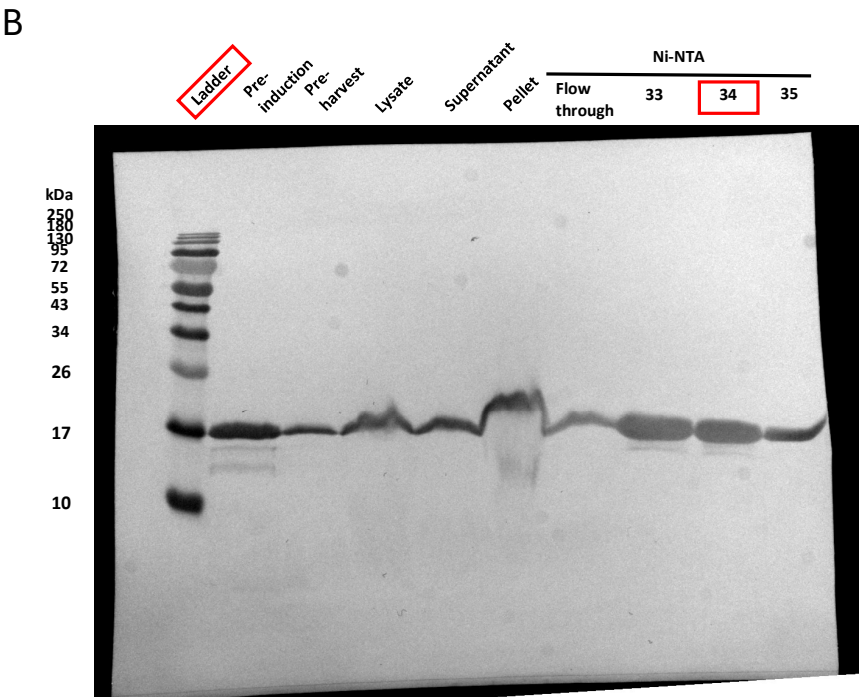

Supplement: fig2-figsupp2-data2 [file Figure 2–figure supplement 2-source data 1.pdf › Figure 2–figure supplement 2-source data 1.pdf]

Figure 4—figure supplement 1—source data 1

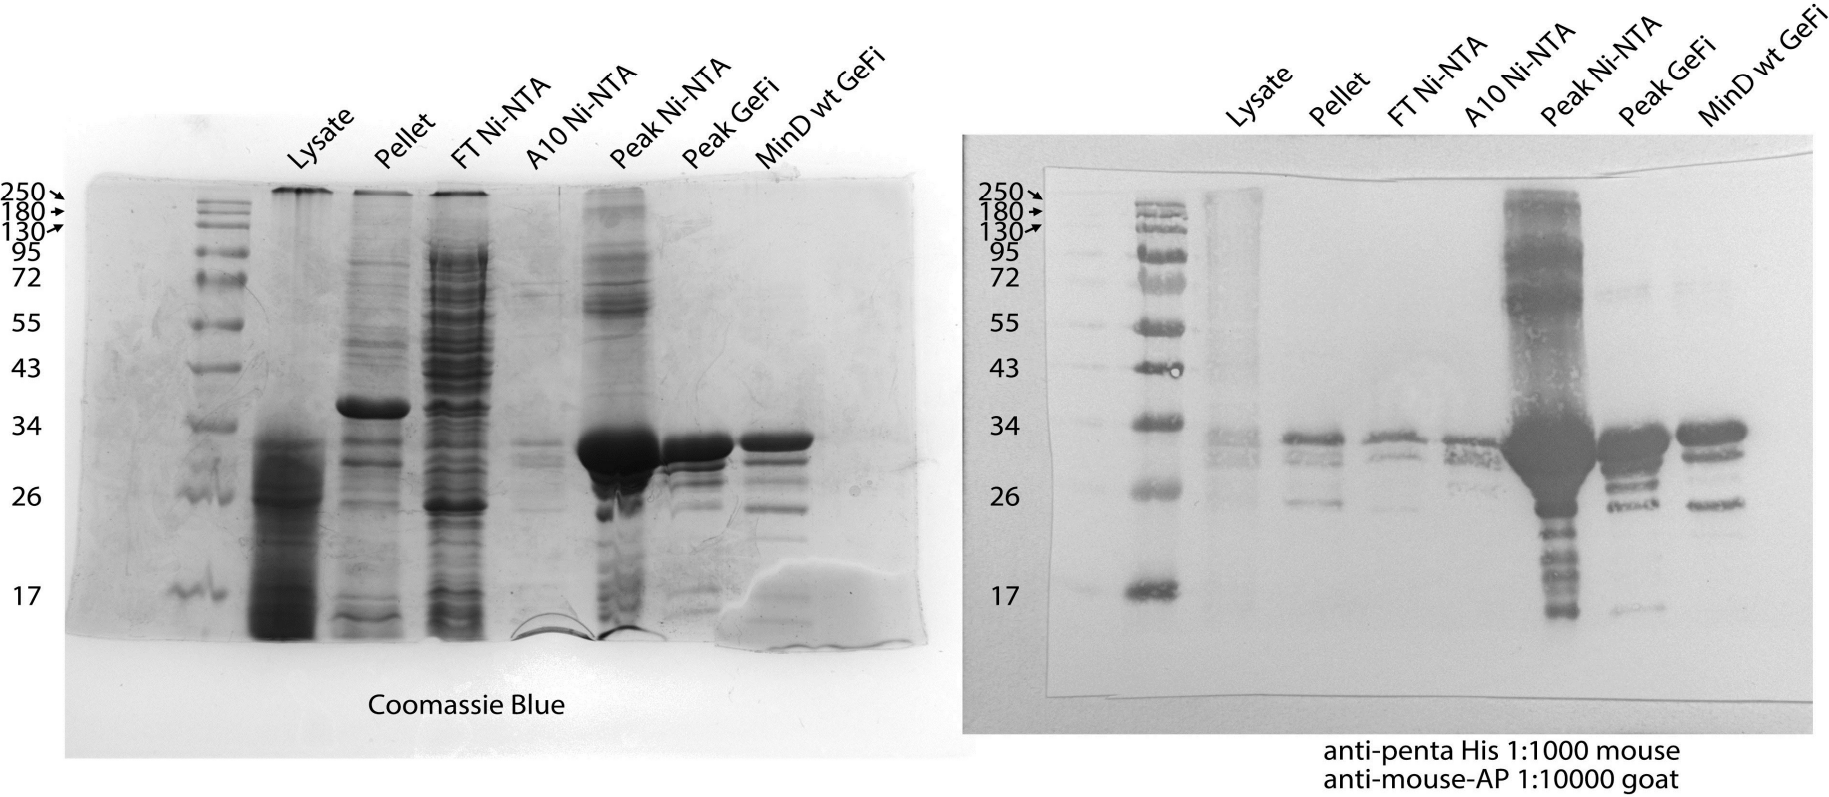

Supplement: fig4-figsupp1-data2 [file Figure 4–figure supplement 1-source data 1.pdf › Figure 4–figure supplement 1-source data 1.pdf]

Figure 4—figure supplement 3—source data 1

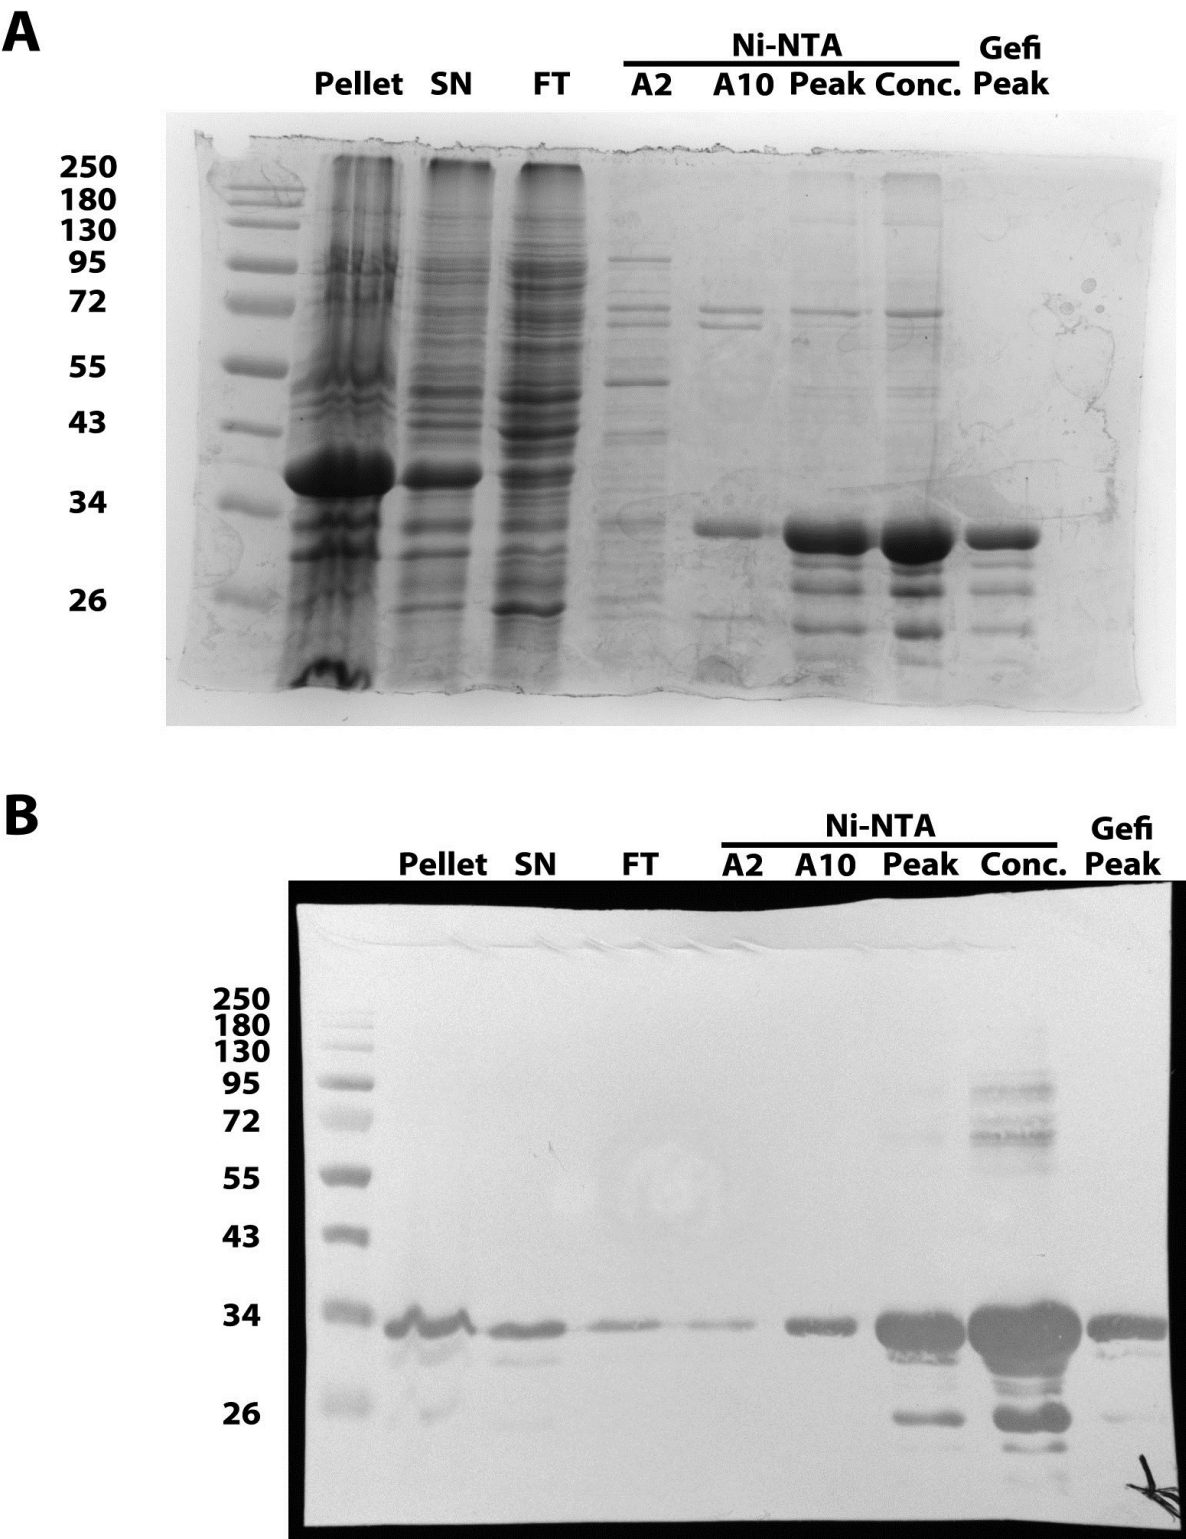

Supplement: fig4-figsupp3-data2 [file Figure 4–figure supplement 3-source data 1.pdf › Figure 4–figure supplement 3-source data 1.pdf]
